# Supplementary material for: An essential periplasmic protein coordinates lipid trafficking and is required for asymmetric polar growth in mycobacteria
Source: bioRxiv preprint, doi:10.1101/633768, version 4 (2022-05-26)
Supplement: Supplemental Table 1 [file 633768_file02.xlsx]

## Sheet: delta_lamA_vs_WT_tnseq_resampli
#Resampling
#GUI with: norm=TTR, samples=10000, pseudocounts=0.00, adaptive=True, histogram=False, includeZeros=True
#Parameters: samples=10000, norm=TTR, histograms=False, adaptive=True, excludeZeros=False, pseudocounts=0.0, LOESS=False, trim_Nterm=0.0, trim_Cterm=0.0
#Orf	Name	Desc	Sites	Mean Ctrl	Mean Exp	log2FC	Sum Ctrl	Sum Exp	Delta Mean	p-value	Adj. p-value
MSMEG_3187c	-	acyltransferase domain-containing protein	31	114.3	10.7	-3.41	7085.7	665.39	-103.6	0	0
MSMEG_4265c	-	MmpS3 protein	16	142.4	10.7	-3.73	4555.3	342.14	-131.7	0	0
MSMEG_0786c	-	serine/threonine protein kinase	25	77.3	18.9	-2.03	3865.4	944.54	-58.4	0.0001	0.1679
MSMEG_5041c	-	acyltransferase	19	75.6	6.7	-3.5	2873	253.4	-68.9	0.0001	0.1679
MSMEG_6154	-	adenylate cyclase, family protein 3	11	194.3	52.8	-1.88	4274.1	1161.46	-141.5	0.0002	0.26864
MSMEG_0788c	-	hypothetical protein MSMEG_0788	12	189.5	39.4	-2.27	4549	945.05	-150.2	0.0003	0.3358
MSMEG_3641	-	hypothetical protein MSMEG_3641	25	184.3	44	-2.07	9215.9	2199.26	-140.3	0.0005	0.47971
MSMEG_0381	-	Mmp14a protein	36	148.7	61.7	-1.27	10710	4439.67	-87.1	0.0006	0.5037
MSMEG_4483c	-	deoxyguanosinetriphosphate triphosphohydrolase-like protein	9	108.8	20	-2.44	1958.1	360.51	-88.8	0.0007	0.52236
MSMEG_4296c	-	protease	15	341.9	82.4	-2.05	10258.5	2473.1	-259.5	0.0009	0.60444
MSMEG_0001	dnaN	DNA polymerase III subunit beta	8	0.3	0	-0.33	4	0	-0.3	1	1
MSMEG_0002	-	6-phosphogluconate dehydrogenase-like protein	10	57.7	28.7	-1	1153.7	574.97	-28.9	0.53	1
MSMEG_0003	recF	recombination protein F	11	7.4	17	1.19	163.7	373.96	9.6	0.57	1
MSMEG_0004	-	hypothetical protein MSMEG_0004	3	26.6	10.9	-1.29	159.4	65.19	-15.7	0.68	1
MSMEG_0005	gyrB	DNA gyrase subunit B	22	1.1	2.5	1.15	49.3	109.05	1.4	0.27	1
MSMEG_0006	gyrA	DNA gyrase subunit A	33	0.3	2.3	2.88	20.5	150.7	2	0.2	1
MSMEG_0007	-	hypothetical protein MSMEG_0007	6	680.9	232.3	-1.55	8171.3	2787.31	-448.7	0.11	1
MSMEG_0009	-	hypothetical protein MSMEG_0009	0	0	0	0	0	0	0	1	1
MSMEG_0011	-	FAD-binding 9, siderophore-interacting	11	203.1	204.7	0.01	4467.7	4504.1	1.7	1	1
MSMEG_0012	-	ferric enterobactin transport system permease protein FepD	9	67.5	83.7	0.31	1215.8	1506.84	16.2	0.92	1
MSMEG_0014c	FxbA	Formyl transferase	13	56.9	70.9	0.32	1478.2	1843.16	14	0.71	1
MSMEG_0015	-	ferric enterobactin transport ATP-binding protein FepC	6	16.5	24.8	0.59	198.1	297.51	8.3	0.45	1
MSMEG_0016	-	hypothetical protein MSMEG_0016	1	0	200.6	7.66	0	401.13	200.6	0.32	1
MSMEG_0017	-	ABC transporter, permease/ATP-binding protein	19	70.2	86.9	0.31	2668.3	3302.79	16.7	0.68	1
MSMEG_0018	-	ABC transporter, permease/ATP-binding protein	11	114.3	343	1.59	2514.6	7544.97	228.7	0.22	1
MSMEG_0019	-	amino acid adenylation	202	69.9	116.1	0.73	28234.7	46887.9	46.2	0.0036	1
MSMEG_0020c	-	periplasmic binding protein	10	61.8	84	0.44	1236.1	1679.66	22.2	0.58	1
MSMEG_0021	panD	aspartate 1-decarboxylase	5	89.8	112.4	0.32	897.9	1123.95	22.6	0.66	1
MSMEG_0022	-	L-ornithine 5-monooxygenase	18	125.3	104	-0.27	4512.4	3745.42	-21.3	0.56	1
MSMEG_0023c	-	hypothetical protein MSMEG_0023	4	149.9	66.6	-1.17	1199.2	532.55	-83.3	0.58	1
MSMEG_0024	-	peptidyl-prolyl cis-trans isomerase B	6	269.5	331.8	0.3	3233.9	3982.14	62.3	0.57	1
MSMEG_0025c	-	hypothetical protein MSMEG_0025	5	81	49.8	-0.7	810	498.27	-31.2	0.55	1
MSMEG_0026c	-	putative septation inhibitor protein	2	8.1	4.7	-0.8	32.4	18.63	-3.4	0.87	1
MSMEG_0027	-	hypothetical protein MSMEG_0027	8	326.3	829.6	1.35	5220.9	13274	503.3	0.095	1
MSMEG_0028c	-	serine-threonine protein kinase	14	0.6	1.1	0.9	16.2	30.14	0.5	1	1
MSMEG_0029	-	para-aminobenzoate synthase component II	5	22.6	111.8	2.31	225.5	1117.88	89.2	0.9	1
MSMEG_0030c	pknA	serine/threonine protein kinase PknA	12	22.4	22.3	-0.01	538.8	535	-0.2	1	1
MSMEG_0031c	-	penicillin binding protein transpeptidase domain-containing protein	20	166	305.1	0.88	6639.6	12202.5	139.1	0.16	1
MSMEG_0032c	-	cell cycle protein, FtsW/RodA/SpoVE family protein	17	84.7	196.8	1.22	2880.3	6690.2	112.1	0.47	1
MSMEG_0033c	-	protein phosphatase 2C	10	60.8	115.4	0.93	1215.2	2308.96	54.7	0.31	1
MSMEG_0034c	-	FHA domain-containing protein	10	165.4	326.2	0.98	3307	6524.88	160.9	0.31	1
MSMEG_0035c	-	FHA domain-containing protein	48	51	232.7	2.19	4894	22335.6	181.7	0.039	1
MSMEG_0036c	-	hypothetical protein MSMEG_0036	1	0	0	0	0	0	0	1	1
MSMEG_0039c	-	small membrane hydrophobic protein	4	348.7	476	0.45	2789.6	3808.3	127.3	0.53	1
MSMEG_0040c	-	hypothetical protein MSMEG_0040	4	87.7	354.9	2.02	701.5	2839.07	267.2	0.53	1
MSMEG_0041c	-	hypothetical protein MSMEG_0041	5	81.9	50.8	-0.69	819.2	507.58	-31.2	0.58	1
MSMEG_0042	-	TetR-family protein transcriptional regulator	6	18.1	29.1	0.68	217.4	349.25	11	0.68	1
MSMEG_0043c	-	extradiol ring-cleavage dioxygenase, class III enzyme, subunit B	13	107.1	205.9	0.94	2784.2	5353.68	98.8	0.14	1
MSMEG_0044	-	hypothetical protein MSMEG_0044	19	65.6	93.3	0.51	2492	3544.03	27.7	0.63	1
MSMEG_0045	-	hypothetical protein MSMEG_0045	15	160.8	304.3	0.92	4823.4	9128.64	143.5	0.4	1
MSMEG_0046	-	hypothetical protein MSMEG_0046	14	148.9	218.2	0.55	4168.1	6109.51	69.3	0.92	1
MSMEG_0047c	-	hypothetical protein MSMEG_0047	4	164.4	169.3	0.04	1315.2	1354.46	4.9	0.99	1
MSMEG_0048	-	pyridoxamine 5'-phosphate oxidase family protein	10	224.6	305.5	0.44	4492.9	6110.54	80.9	0.56	1
MSMEG_0049c	-	pirin domain-containing protein	9	89.8	126.5	0.49	1616.8	2276.88	36.7	0.73	1
MSMEG_0050	-	hypothetical protein MSMEG_0050	3	132.8	64.4	-1.04	796.6	386.51	-68.3	0.45	1
MSMEG_0051c	-	transcription factor WhiB family protein	1	0	0	0	0	0	0	1	1
MSMEG_0052	-	hypothetical protein MSMEG_0052	3	10.2	0.8	-3.71	61	4.66	-9.4	0.73	1
MSMEG_0053c	-	hypothetical protein MSMEG_0053	11	236.7	327.9	0.47	5207.7	7214.83	91.2	0.76	1
MSMEG_0054	-	ISMsm2, transposase	9	210.8	170.2	-0.31	3793.7	3064	-40.5	0.73	1
MSMEG_0055	-	hypothetical protein MSMEG_0055	11	242.5	294.1	0.28	5335	6470.77	51.6	0.64	1
MSMEG_0056	-	hypothetical protein MSMEG_0056	3	264.8	268.7	0.02	1588.9	1612.13	3.9	0.98	1
MSMEG_0057	-	hypothetical protein MSMEG_0057	6	176	185.2	0.07	2111.8	2222.29	9.2	0.9	1
MSMEG_0058	-	hypothetical protein MSMEG_0058	5	121.7	29.8	-2.03	1217.2	297.77	-91.9	0.066	1
MSMEG_0059	-	ATPase, AAA family protein	21	157.7	249.7	0.66	6625	10487.8	92	0.29	1
MSMEG_0060	-	hypothetical protein MSMEG_0060	17	119.4	138	0.21	4060.5	4692.29	18.6	0.69	1
MSMEG_0061	-	ftsk/SpoIIIE family protein	23	122.7	183.6	0.58	5646.3	8445.5	60.9	0.62	1
MSMEG_0062	-	ftsk/SpoIIIE family protein	16	198.4	248.2	0.32	6348.7	7941.01	49.8	0.58	1
MSMEG_0063	-	PE family protein	2	495.4	468.3	-0.08	1981.5	1873.3	-27.1	1	1
MSMEG_0064	-	PPE family protein	6	224.5	174.5	-0.36	2693.5	2094.36	-49.9	0.57	1
MSMEG_0065	-	hypothetical protein MSMEG_0065	2	480.6	261	-0.88	1922.2	1044.01	-219.6	0.19	1
MSMEG_0066	-	early secretory antigenic target, 6 kDa	3	109.9	62.9	-0.81	659.3	377.19	-47	0.57	1
MSMEG_0067	-	hypothetical protein MSMEG_0067	12	126.9	76.6	-0.73	3045.3	1838.62	-50.3	0.14	1
MSMEG_0068	-	transmembrane protein	9	122.8	217.2	0.82	2210.5	3910.11	94.4	0.69	1
MSMEG_0069	-	translation initiation factor IF-2 protein	11	256.8	166.1	-0.63	5650.3	3654.87	-90.7	0.122	1
MSMEG_0070	-	hypothetical protein MSMEG_0070	6	108.3	106.6	-0.02	1299.8	1279.56	-1.7	0.99	1
MSMEG_0071	-	hypothetical protein MSMEG_0071	46	122.3	192.8	0.66	11252.5	17740.5	70.5	0.31	1
MSMEG_0074	-	IS1549, transposase	16	335.3	361.7	0.11	10730	11573.8	26.4	0.76	1
MSMEG_0075	-	hypothetical protein MSMEG_0075	7	107.2	35.9	-1.58	1500.4	502.67	-71.3	0.22	1
MSMEG_0076	-	antigen MTB48	14	131.8	332.6	1.34	3690.8	9313.61	200.8	0.25	1
MSMEG_0077c	-	hypothetical protein MSMEG_0077	5	127.5	264.1	1.05	1275.1	2641.15	136.6	0.28	1
MSMEG_0078c	-	hypothetical protein MSMEG_0078	6	208.8	346.6	0.73	2505.8	4159.11	137.8	0.31	1
MSMEG_0079c	-	hypothetical protein MSMEG_0079	9	180.8	219.5	0.28	3255.1	3950.71	38.6	0.72	1
MSMEG_0080c	-	hypothetical protein MSMEG_0080	9	149.4	183.3	0.3	2688.4	3299.68	34	0.79	1
MSMEG_0081c	-	hypothetical protein MSMEG_0081	2	51.3	32	-0.68	205.3	127.93	-19.3	0.66	1
MSMEG_0082c	-	hypothetical protein MSMEG_0082	15	90.8	116.2	0.36	2723.1	3487.24	25.5	0.62	1
MSMEG_0083c	-	membrane-anchored mycosin mycp1	13	183.8	297.1	0.69	4779.3	7723.44	113.2	0.19	1
MSMEG_0084c	-	phosphocarrier protein HPr	2	96.7	119.8	0.31	387	479.12	23	0.58	1
MSMEG_0085c	-	PTS system, Fru family protein, IIABC components	13	155.1	159.2	0.04	4031.8	4139.82	4.2	0.95	1
MSMEG_0086c	-	1-phosphofructokinase	5	84.2	59.1	-0.51	841.9	591.4	-25.1	0.56	1
MSMEG_0087c	-	glucitol operon repressor	4	193.3	424.9	1.14	1546.8	3399.55	231.6	0.5	1
MSMEG_0088	ptsI	phosphoenolpyruvate-protein phosphotransferase	10	249.9	229.4	-0.12	4998.3	4588.82	-20.5	0.85	1
MSMEG_0089	-	chromosome condensation protein	8	318.7	227.5	-0.49	5099.9	3639.35	-91.3	0.56	1
MSMEG_0090c	-	hypothetical protein MSMEG_0090	17	190	296.7	0.64	6458.9	10086.9	106.7	0.75	1
MSMEG_0091c	-	putative transcriptional regulator	14	477.2	996.8	1.06	13360.8	27910.4	519.6	0.064	1
MSMEG_0092	-	transcriptional regulatory protein	13	152	184.2	0.28	3950.9	4790.09	32.3	0.76	1
MSMEG_0093	-	methyltransferase	13	276	369.5	0.42	7174.8	9605.79	93.5	0.51	1
MSMEG_0094c	-	hypothetical protein MSMEG_0094	2	252.4	130.9	-0.95	1009.5	523.49	-121.5	0.33	1
MSMEG_0095	-	methyltransferase	12	389.2	332.7	-0.23	9340.1	7984.97	-56.5	0.7	1
MSMEG_0096	-	peroxisomal hydratase-dehydrogenase-epimerase	10	358.6	551.4	0.62	7171.4	11028.2	192.8	0.35	1
MSMEG_0097	-	oxidoreductase, zinc-binding dehydrogenase family protein	8	70.4	98.2	0.48	1125.9	1571.9	27.9	0.6	1
MSMEG_0098	-	methyltransferase	4	100.6	56.5	-0.83	805.1	451.7	-44.2	0.54	1
MSMEG_0099	-	hypothetical protein MSMEG_0099	4	275	102.9	-1.42	2199.6	823.46	-172	0.18	1
MSMEG_0100c	-	phosphotyrosine protein phosphatase ptpb	5	321	317	-0.02	3210.2	3169.81	-4	0.98	1
MSMEG_0101	-	hypothetical protein MSMEG_0101	4	159	136.1	-0.22	1271.9	1089.03	-22.9	0.78	1
MSMEG_0102c	-	putative acyl-CoA dehydrogenase	6	176.3	62.1	-1.51	2115.2	745.07	-114.2	0.051	1
MSMEG_0103c	-	major facilitator family protein transporter	11	238.3	177.8	-0.42	5242.7	3911.9	-60.5	0.39	1
MSMEG_0104c	-	transcriptional regulator, LysR family protein	7	122.2	735.6	2.59	1710.2	10297.9	613.4	0.073	1
MSMEG_0105	-	DNA-binding response regulator, LuxR family protein	4	104.5	208.8	1	836	1670.74	104.3	0.86	1
MSMEG_0106	-	sensory histidine kinase	11	74.4	49.3	-0.59	1636.3	1084.49	-25.1	0.46	1
MSMEG_0107c	-	cell envelope-related function transcriptional attenuator	21	197.3	184.8	-0.09	8286.9	7763.65	-12.5	0.79	1
MSMEG_0108c	-	acyl-CoA dehydrogenase	15	209.7	198.8	-0.08	6290	5963.97	-10.9	0.87	1
MSMEG_0109c	pntB	NAD(P) transhydrogenase, beta subunit	12	311.4	613.6	0.98	7473.1	14726.5	302.2	0.3	1
MSMEG_0110c	pntA	NAD(P) transhydrogenase subunit alpha	15	326.9	362.2	0.15	9807.5	10866.5	35.3	0.8	1
MSMEG_0111c	-	putative magnesium transport protein	12	507.8	465.9	-0.12	12187.1	11181.1	-41.9	0.77	1
MSMEG_0112c	-	hypothetical protein MSMEG_0112	2	100.8	47.7	-1.08	403.2	190.92	-53.1	0.21	1
MSMEG_0113	-	taurine transport system permease protein TauC	9	170.4	362.5	1.09	3066.3	6525	192.1	0.82	1
MSMEG_0114	-	extracellular solute-binding protein, family protein 3	7	106.6	191.4	0.84	1492.4	2679.56	84.8	0.46	1
MSMEG_0115c	dehII	haloacid dehalogenase, type II	8	52.4	60.4	0.2	838.8	965.62	7.9	0.79	1
MSMEG_0116	-	taurine import ATP-binding protein TauB	3	41.5	110.4	1.41	248.9	662.42	68.9	0.33	1
MSMEG_0117c	-	hydrolase	13	302.9	191.9	-0.66	7874.5	4989.16	-111	0.35	1
MSMEG_0118	-	hypothetical protein MSMEG_0118	3	200.2	172.9	-0.21	1201.5	1037.67	-27.3	0.82	1
MSMEG_0119c	-	hypothetical protein MSMEG_0119	3	165.7	391.6	1.24	994.2	2349.84	225.9	0.23	1
MSMEG_0120	-	transcriptional regulatory protein	14	313.5	294.9	-0.09	8777.3	8256.09	-18.6	0.83	1
MSMEG_0121	-	rhamnolipids biosynthesis 3-oxoacyl-	6	299	305.3	0.03	3588.5	3663.92	6.3	0.95	1
MSMEG_0122	-	putative periplasmic solute-binding protein	14	199	121.6	-0.71	5572.4	3405.86	-77.4	0.3	1
MSMEG_0123	-	hypothetical protein MSMEG_0123	4	82.8	103.6	0.32	662.2	828.77	20.8	0.83	1
MSMEG_0124c	-	transcriptional regulator, GntR family protein	5	50.7	104.4	1.04	506.8	1044.15	53.7	0.85	1
MSMEG_0125	-	integral membrane protein	16	77.7	77.2	-0.01	2486.9	2471.55	-0.5	1	1
MSMEG_0126c	-	mandelate racemase/muconate lactonizing enzyme	10	118.6	92.6	-0.36	2371.7	1851.04	-26	0.59	1
MSMEG_0127c	-	oxidoreductase, zinc-binding dehydrogenase family protein	3	80.5	8.5	-3.24	483	51.22	-72	0.069	1
MSMEG_0128	-	thioesterase superfamily protein	5	396.1	314.3	-0.33	3960.5	3142.51	-81.8	0.5	1
MSMEG_0129	-	cyclase/dehydrase family protein	4	1	3.8	1.9	8.1	30.14	2.8	1	1
MSMEG_0130c	-	transcriptional regulator, GntR family protein	3	164.6	421.3	1.36	987.5	2527.96	256.7	0.4	1
MSMEG_0131	-	acyl-CoA synthetase	12	197.5	286.5	0.54	4740.8	6876.57	89	0.29	1
MSMEG_0132	-	hypothetical protein MSMEG_0132	7	391.4	713.2	0.87	5479.4	9985.47	321.9	0.29	1
MSMEG_0133	-	ABC-transporter integral membrane protein	11	329.5	609	0.89	7248.1	13397.1	279.5	0.43	1
MSMEG_0134	-	virulence factor Mce family protein	15	206.3	182.8	-0.17	6188.8	5482.64	-23.5	0.76	1
MSMEG_0135	-	virulence factor Mce family protein	8	98.4	63.7	-0.63	1574.4	1019.95	-34.7	0.4	1
MSMEG_0136	-	virulence factor Mce family protein, putative	12	46.4	181.3	1.97	1113.7	4350.31	134.9	0.2	1
MSMEG_0137	-	virulence factor mce family protein	14	76	177.8	1.23	2128	4979.35	101.8	0.87	1
MSMEG_0138	-	virulence factor Mce family protein	7	83.6	66.4	-0.33	1170.3	930.05	-17.2	0.63	1
MSMEG_0139	-	mce-family protein mce1f	20	390.2	376.6	-0.05	15607.2	15065.2	-13.6	0.85	1
MSMEG_0140	-	mce associated membrane protein	8	145.8	361.9	1.31	2333.5	5790.01	216	0.72	1
MSMEG_0141	-	mce associated transmembrane protein	7	263	143	-0.88	3681.6	2002	-120	0.29	1
MSMEG_0142	-	hypothetical protein MSMEG_0142	4	86.5	54.7	-0.66	692.3	437.21	-31.9	0.58	1
MSMEG_0143	-	mce associated membrane protein	9	57.3	26.5	-1.11	1030.9	477.18	-30.8	0.23	1
MSMEG_0144c	-	HNH endonuclease	17	95.6	124.1	0.38	3251.8	4220.68	28.5	0.7	1
MSMEG_0145	-	hypothetical protein MSMEG_0145	3	54.8	49.6	-0.14	328.7	297.51	-5.2	0.97	1
MSMEG_0146c	-	mosc domain-containing protein	8	61.4	48	-0.36	982	767.32	-13.4	0.71	1
MSMEG_0147c	-	C-5 sterol desaturase	19	78.2	89.7	0.2	2973	3407.29	11.4	0.67	1
MSMEG_0148c	-	transcriptional regulator, TetR family protein	4	24.6	27.9	0.19	196.5	223.52	3.4	0.83	1
MSMEG_0149c	-	thiamine biosynthesis protein ThiC	14	67.5	76.6	0.18	1891.1	2145.72	9.1	0.81	1
MSMEG_0150c	-	NAD(P) transhydrogenase beta subunit	12	32	17.7	-0.86	767.9	423.76	-14.3	0.23	1
MSMEG_0151c	-	PntAB protein	1	294.7	202.4	-0.54	589.5	404.87	-92.3	0.65	1
MSMEG_0152c	-	alanine dehydrogenase/pyridine nucleotide transhydrogenase	10	13.5	8.1	-0.73	270.3	162.98	-5.4	0.57	1
MSMEG_0153	panE	2-dehydropantoate 2-reductase	9	61.6	81.4	0.4	1108.8	1464.54	19.8	0.65	1
MSMEG_0154	pyk	pyruvate kinase	7	41.5	21.6	-0.94	581	302.69	-19.9	0.43	1
MSMEG_0155c	-	transcriptional regulator	2	63.9	32	-1	255.4	127.93	-31.9	0.3	1
MSMEG_0156	-	transcriptional regulator, LysR family protein	8	87.5	70.4	-0.31	1399.7	1126.4	-17.1	0.7	1
MSMEG_0157	-	putative oxalyl-CoA decarboxylase	17	47.8	86.5	0.85	1626.9	2939.69	38.6	0.25	1
MSMEG_0158	-	formyl-coenzyme A transferase	17	72.4	193.6	1.42	2462.7	6580.88	121.1	0.19	1
MSMEG_0159	-	formate dehydrogenase, gamma subunit	3	16.8	22.5	0.43	100.5	135.04	5.8	0.77	1
MSMEG_0160	-	formate dehydrogenase, beta subunit	14	62.7	61	-0.04	1756.7	1709.14	-1.7	0.92	1
MSMEG_0161	-	formate dehydrogenase, alpha subunit	25	134.8	152.2	0.18	6737.6	7608.34	17.4	0.91	1
MSMEG_0162	-	NAD-dependent formate dehydrogenase delta subunit	3	15.5	12.4	-0.32	93.1	74.51	-3.1	0.75	1
MSMEG_0163c	-	hypothetical protein MSMEG_0163	4	43.7	51.8	0.25	349.6	414.45	8.1	0.87	1
MSMEG_0164c	-	transmembrane transport protein	19	94.6	82	-0.21	3594.2	3116	-12.6	0.64	1
MSMEG_0165	fdhD	formate dehydrogenase accessory protein	6	403.6	245.5	-0.72	4843.7	2946.54	-158.1	0.42	1
MSMEG_0166c	-	GntR-family protein transcriptional regulator	11	268.1	169.5	-0.66	5899.2	3728.86	-98.7	0.42	1
MSMEG_0167c	-	transmembrane transport protein	21	244.5	229.5	-0.09	10269.6	9638.77	-15	0.85	1
MSMEG_0168	-	formyl-coenzyme A transferase	11	259.6	594.8	1.2	5711.2	13084.7	335.2	0.1	1
MSMEG_0169c	-	hypothetical protein MSMEG_0169	0	0	0	0	0	0	0	1	1
MSMEG_0170	-	transmembrane transport protein	25	143.4	195.3	0.45	7172.1	9764.39	51.8	0.35	1
MSMEG_0171	-	histone deacetylase superfamily protein	8	171.8	51	-1.75	2749.1	816.61	-120.8	0.011	1
MSMEG_0172c	-	transmembrane protein, putative	10	47	59.5	0.34	939.4	1189.54	12.5	0.79	1
MSMEG_0173c	-	hypothetical protein MSMEG_0173	2	136.7	341.1	1.32	546.7	1364.43	204.4	0.68	1
MSMEG_0174c	-	putative inner membrane protein	3	136.5	32.6	-2.07	818.7	195.58	-103.9	0.15	1
MSMEG_0175	-	FAD dependent oxidoreductase, putative	6	155	130.2	-0.25	1859.7	1562.19	-24.8	0.85	1
MSMEG_0176	-	glutamine ABC transporter periplasmic-binding protein	7	198	141.8	-0.48	2772.6	1984.54	-56.3	0.34	1
MSMEG_0177	-	ABC polar amino acid family protein transporter, inner membrane subunit	13	42.2	203.1	2.27	1097	5280.37	160.9	0.95	1
MSMEG_0178	-	ATP-binding protein	6	35.7	33.4	-0.1	428.4	400.48	-2.3	0.93	1
MSMEG_0179c	-	transcriptional regulator, GntR family protein	3	18	0	-4.25	107.9	0	-18	0.38	1
MSMEG_0180c	-	putative HTH-type transcriptional regulator	4	132.9	120.2	-0.15	1063.4	961.36	-12.8	0.86	1
MSMEG_0181	-	alpha-ketoglutarate-dependent taurine dioxygenase	13	181.6	88.2	-1.04	4721.3	2293.17	-93.4	0.14	1
MSMEG_0182	-	epoxide hydrolase 1	19	69.7	113.2	0.7	2647.2	4300.49	43.5	0.47	1
MSMEG_0183c	-	hypothetical protein MSMEG_0183	5	160.5	46.3	-1.79	1605.4	462.7	-114.3	0.19	1
MSMEG_0184	-	transferase	16	47.7	139.2	1.54	1527.9	4454.95	91.5	0.61	1
MSMEG_0185c	-	MmpL6 protein	34	143.6	137.1	-0.07	9767.5	9322.37	-6.5	0.89	1
MSMEG_0186c	-	MmpS2 protein	3	269.4	133.8	-1.01	1616.2	802.89	-135.5	0.11	1
MSMEG_0187c	-	acetyltransferase	10	143.4	130.2	-0.14	2867.4	2603.37	-13.2	0.78	1
MSMEG_0188	-	MarR-family protein transcriptional regulator	0	0	0	0	0	0	0	1	1
MSMEG_0189c	anmK	anhydro-N-acetylmuramic acid kinase	13	128.2	263.3	1.04	3332.6	6846.83	135.2	0.21	1
MSMEG_0190c	-	integral membrane transport protein	23	165.5	175.1	0.08	7613.1	8055.22	9.6	0.84	1
MSMEG_0191c	-	BadF/BadG/BcrA/BcrD ATPase family protein	2	0	4.7	2.5	0	18.63	4.7	1	1
MSMEG_0192	-	transcriptional regulator, RpiR family protein	7	138.4	123	-0.17	1937.7	1721.43	-15.4	0.81	1
MSMEG_0193	murQ	N-acetylmuramic acid-6-phosphate etherase	6	156.9	305	0.96	1882.7	3660.33	148.1	0.59	1
MSMEG_0194c	-	serine esterase, cutinase family protein	8	130.2	145.1	0.16	2083.8	2322.02	14.9	0.87	1
MSMEG_0195	-	steroid monooxygenase	25	210	249.3	0.25	10499.8	12465.4	39.3	0.64	1
MSMEG_0196	-	putative dehydrogenase	14	122	74	-0.72	3416.9	2070.94	-48.1	0.22	1
MSMEG_0197c	-	nudix hydrolase	6	200.5	194.8	-0.04	2405.6	2337.81	-5.7	0.98	1
MSMEG_0198c	-	acyl-CoA dehydrogenase domain-containing protein	8	217.7	239.7	0.14	3483.6	3835.2	22	0.87	1
MSMEG_0200	-	hypothetical protein MSMEG_0200	23	98.5	163	0.73	4529.8	7498.75	64.5	0.19	1
MSMEG_0201c	-	hypothetical protein MSMEG_0201	6	261.5	275.1	0.07	3138.2	3301.75	13.6	0.94	1
MSMEG_0202	-	IS1096, tnpA protein	9	553.6	531.5	-0.06	9965.5	9567.25	-22.1	0.92	1
MSMEG_0203c	-	IS1096, tnpR protein	10	390.8	334	-0.23	7816.3	6679.81	-56.8	0.58	1
MSMEG_0204	-	hypothetical protein MSMEG_0204	12	92.8	380.3	2.04	2227.3	9128.13	287.5	0.89	1
MSMEG_0205c	-	tetracenomycin polyketide synthesis hydroxylase TcmH	4	278.5	318.4	0.19	2228	2547.23	39.9	0.76	1
MSMEG_0206c	-	acyltransferase 3	20	173.9	193	0.15	6957.6	7718.65	19	0.76	1
MSMEG_0207	-	MarR-family protein transcriptional regulator	3	81.9	94.6	0.21	491.6	567.34	12.6	0.83	1
MSMEG_0208	-	ribonuclease	7	86.8	282.6	1.7	1214.5	3957.07	195.9	0.27	1
MSMEG_0209	-	ribonuclease inhibitor	3	98	562.9	2.52	587.8	3377.44	464.9	0.59	1
MSMEG_0210c	-	LprO protein	19	108.8	159.5	0.55	4135.9	6059.95	50.6	0.26	1
MSMEG_0211c	-	ABC transporter, ATP-binding protein	19	197.8	287.7	0.54	7514.6	10930.9	89.9	0.3	1
MSMEG_0212c	-	lyase	4	64.3	439.1	2.77	514.3	3512.74	374.8	0.13	1
MSMEG_0213c	-	transcriptional regulator	9	169	268.8	0.67	3042.8	4837.82	99.7	0.48	1
MSMEG_0214c	-	L-sorbosone dehydrogenase	12	191.6	308.9	0.69	4598.3	7412.88	117.3	0.35	1
MSMEG_0215c	-	YhhW family protein	8	152.5	273.8	0.84	2439.6	4381.34	121.4	0.8	1
MSMEG_0216	-	3-hydroxyacyl-CoA dehydrogenase	10	185.6	287.7	0.63	3712.6	5754.43	102.1	0.49	1
MSMEG_0217c	-	alcohol dehydrogenase B	11	193.8	220.3	0.19	4263.2	4847.39	26.6	0.81	1
MSMEG_0218	-	3-demethylubiquinone-9 3-methyltransferase	6	267.9	285.4	0.09	3214.8	3425.28	17.5	0.88	1
MSMEG_0219c	-	RNA polymerase factor sigma-70	12	222.5	355.7	0.68	5341.2	8535.92	133.1	0.48	1
MSMEG_0220	-	monoglyceride lipase	12	95.2	83.4	-0.19	2285	2000.71	-11.8	0.67	1
MSMEG_0221	-	secreted protein	8	142.9	125.3	-0.19	2286.8	2004.46	-17.6	0.83	1
MSMEG_0222	-	hypothetical protein MSMEG_0222	8	211.1	262.9	0.32	3378.4	4206.84	51.8	0.87	1
MSMEG_0223	-	hypothetical protein MSMEG_0223	5	101.6	62.4	-0.7	1016.3	623.74	-39.3	0.34	1
MSMEG_0224	-	O-methyltransferase MdmC	5	113.8	304.8	1.42	1137.8	3048.22	191	0.17	1
MSMEG_0225c	-	MmpL4 protein	30	236.6	244.3	0.05	14197.4	14659.9	7.7	0.94	1
MSMEG_0226c	-	MmpS5 protein	4	188.2	257.4	0.45	1505.6	2059.05	69.2	0.47	1
MSMEG_0227	-	transcriptional regulator, TetR family protein	4	121.3	230	0.92	970.7	1840.32	108.7	0.85	1
MSMEG_0228	-	adenylate and guanylate cyclase catalytic domain-containing protein	31	151.7	184	0.28	9408.5	11409.6	32.3	0.56	1
MSMEG_0229c	ilvD	dihydroxy-acid dehydratase	9	346.9	315.9	-0.13	6243.4	5686.76	-30.9	0.85	1
MSMEG_0230	-	hypothetical protein MSMEG_0230	5	479.2	380	-0.33	4792	3799.76	-99.2	0.6	1
MSMEG_0231c	-	hypothetical protein MSMEG_0231	2	184.1	107.1	-0.78	736.3	428.42	-77	0.43	1
MSMEG_0232	-	sugar transporter family protein	8	270.9	260.5	-0.06	4334.3	4167.51	-10.4	0.97	1
MSMEG_0233	-	lipoprotein Lpps	10	737.4	776.8	0.08	14747.1	15535.1	39.4	0.9	1
MSMEG_0234c	-	metallopeptidase	25	261.3	566.7	1.12	13067.3	28333.2	305.3	0.063	1
MSMEG_0235	-	hypothetical protein MSMEG_0235	4	219.4	366.3	0.74	1754.9	2930.12	146.9	0.6	1
MSMEG_0236	-	putative transmembrane protein	4	155.3	129.5	-0.26	1242.6	1035.99	-25.8	0.85	1
MSMEG_0237	-	ISMsm3, transposase	9	139	117.7	-0.24	2501.7	2118.42	-21.3	0.7	1
MSMEG_0238c	-	O-acetylhomoserine/O-acetylserine sulfhydrylase	6	369	283.8	-0.38	4428.1	3405.23	-85.2	0.59	1
MSMEG_0239c	-	O-acetylhomoserine/O-acetylserine sulfhydrylase	12	305	203.2	-0.59	7318.9	4876.23	-101.8	0.13	1
MSMEG_0240c	-	hypothetical protein MSMEG_0240	5	157.4	119.7	-0.4	1574	1196.77	-37.7	0.66	1
MSMEG_0241c	-	MmpL11 protein	17	303.2	352.6	0.22	10309.3	11987	49.3	0.64	1
MSMEG_0242	-	hypothetical protein MSMEG_0242	2	420.9	279.2	-0.59	1683.6	1116.83	-141.7	0.52	1
MSMEG_0243	-	hypothetical protein MSMEG_0243	4	138.1	128.4	-0.1	1105.2	1027.58	-9.7	0.9	1
MSMEG_0244	-	two component response transcriptional regulatory protein prra	5	205.3	233.7	0.19	2052.8	2337.42	28.5	0.81	1
MSMEG_0245c	-	transmembrane protein	2	154.5	164.1	0.09	618.2	656.59	9.6	1	1
MSMEG_0246	-	sensor-type histidine kinase PrrB	3	69.8	29.5	-1.24	418.7	176.95	-40.3	0.5	1
MSMEG_0247c	-	secreted peptidase	15	107.3	109.9	0.03	3218.9	3296.3	2.6	0.95	1
MSMEG_0248c	-	hypothetical protein MSMEG_0248	10	190.6	158.1	-0.27	3812.7	3162.56	-32.5	0.74	1
MSMEG_0249	-	integral membrane protein	8	33.5	76.1	1.18	535.8	1217.99	42.6	0.28	1
MSMEG_0250c	MmpL3	membrane protein, MmpL family protein	21	0.4	0.7	0.9	16.2	30.14	0.3	1	1
MSMEG_0251c	-	hypothetical protein MSMEG_0251	10	85.1	98.4	0.21	1701.1	1967.2	13.3	0.71	1
MSMEG_0252c	trmB	tRNA (guanine-N(7))-methyltransferase	6	65	55.9	-0.22	779.6	670.56	-9.1	0.83	1
MSMEG_0253	-	hypothetical protein MSMEG_0253	3	37.6	52	0.47	225.3	312	14.4	0.58	1
MSMEG_0254	-	hypothetical protein MSMEG_0254	10	255.4	144.6	-0.82	5108.5	2892.46	-110.8	0.34	1
MSMEG_0255	pckA	phosphoenolpyruvate carboxykinase	15	590.5	540.8	-0.13	17715.9	16223.7	-49.7	0.86	1
MSMEG_0256	-	hypothetical protein MSMEG_0256	9	178.4	403.4	1.18	3211.5	7261.27	225	0.17	1
MSMEG_0257	-	acyl-CoA synthetase	20	170.9	153.4	-0.16	6836.1	6136.13	-17.5	0.77	1
MSMEG_0258c	-	oxidoreductase, short chain dehydrogenase/reductase family protein	5	5.1	32.6	2.68	50.8	325.97	27.5	0.24	1
MSMEG_0259	-	enoyl-CoA hydratase/isomerase	4	60.9	165.1	1.44	486.8	1321.09	104.3	0.54	1
MSMEG_0260	-	DNA-binding protein	8	239.1	195.8	-0.29	3825.9	3133.45	-43.3	0.56	1
MSMEG_0261	-	p40 protein	8	98.5	95	-0.05	1576.5	1520.42	-3.5	0.98	1
MSMEG_0262	-	hypothetical protein MSMEG_0262	5	67.1	30.3	-1.15	671.2	302.69	-36.9	0.17	1
MSMEG_0263	-	amidohydrolase 3	13	13.6	14.4	0.08	354.2	374.74	0.8	0.86	1
MSMEG_0264	-	transmembrane transport protein	7	45.6	74.2	0.7	639.1	1038.84	28.6	0.39	1
MSMEG_0265c	-	uracil DNA glycosylase superfamily protein	4	29.9	51.8	0.79	239.2	414.45	21.9	0.54	1
MSMEG_0266	-	arginine decarboxylase	15	60.6	105.8	0.8	1817	3173.7	45.2	0.39	1
MSMEG_0267	-	esterase	12	61.4	39.7	-0.63	1474.2	951.65	-21.8	0.35	1
MSMEG_0268c	-	transcriptional regulator, GntR family protein	12	48.3	108.7	1.17	1159	2609.05	60.4	0.11	1
MSMEG_0269c	-	short chain dehydrogenase	8	109.7	271.4	1.31	1755.4	4341.89	161.7	0.46	1
MSMEG_0270c	-	aminoglycoside phosphotransferase	10	124.3	57.2	-1.12	2486.9	1144.52	-67.1	0.17	1
MSMEG_0271c	-	hypothetical protein MSMEG_0271	12	72.2	59.8	-0.27	1733.1	1435.57	-12.4	0.75	1
MSMEG_0272c	-	propanediol utilization protein PduA	1	23.5	0	-4.61	47	0	-23.5	1	1
MSMEG_0273c	-	ethanolamine utilization protein EutN	1	0	0	0	0	0	0	1	1
MSMEG_0274c	-	hypothetical protein MSMEG_0274	2	0	0	0	0	0	0	1	1
MSMEG_0275c	-	microcompartments protein family protein	8	48.1	9.6	-2.32	769.2	153.67	-38.5	0.19	1
MSMEG_0276c	-	aldehyde-alcohol dehydrogenase	13	73.5	53.4	-0.46	1911.9	1387.83	-20.2	0.54	1
MSMEG_0277c	-	putative aminotransferase	13	86.2	67.9	-0.34	2242	1765.54	-18.3	0.58	1
MSMEG_0278c	-	hypothetical protein MSMEG_0278	1	109.8	32.6	-1.75	219.5	65.19	-77.2	0.66	1
MSMEG_0279	-	amino acid permease	24	63.2	87.3	0.47	3033.9	4192.47	24.1	0.41	1
MSMEG_0280c	-	alpha/beta hydrolase fold	9	71.3	241	1.76	1282.7	4337.63	169.7	0.15	1
MSMEG_0281	-	choline dehydrogenase	20	128.4	68	-0.92	5134.5	2720.16	-60.4	0.11	1
MSMEG_0282	-	hypothetical protein MSMEG_0282	7	60.8	22.6	-1.43	851.1	316.66	-38.2	0.23	1
MSMEG_0283	-	short chain dehydrogenase	5	19.1	10.7	-0.84	191.1	107.1	-8.4	0.49	1
MSMEG_0284c	-	ribosyldihydronicotinamide dehydrogenase (quinone)	13	25.5	50.6	0.99	663.6	1315.01	25.1	0.23	1
MSMEG_0285c	-	transcriptional regulator TetR family protein	5	30.7	96.4	1.65	307.4	963.81	65.6	0.1	1
MSMEG_0286c	-	GntR-family protein transcriptional regulator	6	88	27.1	-1.7	1055.5	325.71	-60.8	0.12	1
MSMEG_0287c	-	hypothetical protein MSMEG_0287	4	15	0	-4	119.6	0	-15	0.5	1
MSMEG_0288	-	FAD dependent oxidoreductase, putative	10	88.7	363.1	2.03	1773.2	7262.2	274.4	0.24	1
MSMEG_0289	-	alpha/beta hydrolase fold family protein	12	77.4	45.5	-0.77	1857.8	1090.83	-32	0.28	1
MSMEG_0290	-	acyltransferase, ws/dgat/mgat subfamily protein	12	107.8	83	-0.38	2586.7	1993.07	-24.7	0.61	1
MSMEG_0291c	-	dioxygenase, TauD/TfdA family protein	11	41	59.9	0.55	901.6	1318.12	18.9	0.58	1
MSMEG_0292c	-	hypothetical protein MSMEG_0292	5	12.8	16.1	0.32	128.2	160.53	3.2	0.8	1
MSMEG_0293c	-	Rieske (2Fe-2S) domain-containing protein	20	53.5	22.9	-1.23	2138.2	914.65	-30.6	0.025	1
MSMEG_0294c	fabG	3-oxoacyl-(acyl-carrier-protein) reductase	6	0	9.7	3.42	0	116.42	9.7	0.56	1
MSMEG_0295c	-	oxidoreductase, FAD-binding	10	53.8	15.1	-1.83	1075.6	302.43	-38.7	0.079	1
MSMEG_0296c	-	transcriptional regulator, MarR family protein	1	93.6	52.3	-0.84	187.1	104.65	-41.2	0.23	1
MSMEG_0297c	-	amidohydrolase	15	25.9	168.8	2.7	777.2	5064.34	142.9	0.1	1
MSMEG_0298c	-	hypothetical protein MSMEG_0298	4	10.3	14.2	0.47	82.1	113.7	4	0.66	1
MSMEG_0299c	-	Rieske (2Fe-2S) domain-containing protein	22	58.9	64.3	0.13	2592.5	2830	5.4	0.87	1
MSMEG_0300	-	amidohydrolase family protein	16	49.5	49.2	-0.01	1584.7	1572.93	-0.4	0.98	1
MSMEG_0301c	-	oxidoreductase, FAD-binding	6	46.8	30.3	-0.63	561.7	363.22	-16.5	0.61	1
MSMEG_0302c	-	peptidase, S9A/B/C families	17	40.5	248.8	2.62	1377.8	8457.83	208.2	0.45	1
MSMEG_0303	-	alcohol dehydrogenase, zinc-containing	6	30.3	133.6	2.14	363.8	1603.09	103.3	0.67	1
MSMEG_0304c	-	acyl-CoA synthetase	11	150.7	174.7	0.21	3316.3	3843.74	24	0.82	1
MSMEG_0305c	-	acyltransferase domain-containing protein	10	89.3	65.1	-0.46	1786.5	1301.16	-24.3	0.63	1
MSMEG_0306	-	arylamine N-acetyltransferase	9	75.8	176.1	1.22	1363.6	3169.43	100.3	0.82	1
MSMEG_0307	-	transcriptional regulator, AraC family protein	8	107	51	-1.07	1712.8	816.35	-56	0.94	1
MSMEG_0308	-	dihydrofolate reductase	8	190	112.3	-0.76	3040.6	1796.97	-77.7	0.43	1
MSMEG_0309c	-	aldehyde dehydrogenase family protein	12	202	350.4	0.79	4848	8408.52	148.4	0.37	1
MSMEG_0311	-	glycosyltransferase	12	0.5	2.5	2.31	12.1	60.28	2	0.47	1
MSMEG_0312c	eda	2-dehydro-3-deoxyphosphogluconate aldolase/4-hydroxy-2-oxoglutarate aldolase	7	119.1	100.1	-0.25	1667.2	1401.67	-19	0.79	1
MSMEG_0313c	edd	phosphogluconate dehydratase	14	200.5	87.5	-1.2	5614.5	2451.36	-113	0.0092	1
MSMEG_0314c	zwf	glucose-6-phosphate 1-dehydrogenase	15	203.6	152.5	-0.42	6107.1	4573.54	-51.1	0.35	1
MSMEG_0315c	-	transmembrane protein	13	15.1	52.9	1.81	392.8	1375.94	37.8	0.56	1
MSMEG_0316	-	putative NagC regulator	9	104.9	100.4	-0.06	1888.9	1806.81	-4.6	0.98	1
MSMEG_0317c	-	hypothetical protein MSMEG_0317	15	0.7	4.2	2.63	20.2	125.21	3.5	0.23	1
MSMEG_0318c	-	AMP-dependent synthetase and ligase	12	164.8	157	-0.07	3955.8	3768.57	-7.8	0.93	1
MSMEG_0319	-	acyltransferase	9	0.2	5	4.49	4	90.68	4.8	0.23	1
MSMEG_0320c	-	putative phosphotriesterase	9	207.9	107.2	-0.96	3741.6	1929.56	-100.7	0.77	1
MSMEG_0321c	-	transcriptional regulator	19	55.9	65.2	0.22	2122.6	2477.38	9.3	0.79	1
MSMEG_0323c	-	acyl-CoA dehydrogenase, short-chain specific, putative	19	137.7	133.1	-0.05	5233.9	5056.17	-4.7	0.97	1
MSMEG_0324	-	hypothetical protein MSMEG_0324	5	129.5	398.6	1.62	1295	3985.52	269.1	0.46	1
MSMEG_0325	-	hypothetical protein MSMEG_0325	5	84.4	48.9	-0.79	844.5	488.7	-35.6	0.22	1
MSMEG_0326	-	AMP-dependent synthetase and ligase	19	239.1	292.6	0.29	9085.1	11120.5	53.6	0.67	1
MSMEG_0327	-	aldehyde dehydrogenase	18	129.2	167.1	0.37	4651.6	6016.1	37.9	0.47	1
MSMEG_0328	-	hypothetical protein MSMEG_0328	5	49.6	71.7	0.53	496.2	716.87	22.1	0.58	1
MSMEG_0329	-	FMN oxidoreductase	4	163	27.9	-2.54	1303.7	223.52	-135	0.36	1
MSMEG_0330c	-	transcriptional regulator, LuxR family protein	9	153.8	163.9	0.09	2767.7	2949.77	10.1	0.89	1
MSMEG_0331c	-	transcriptional regulator, LuxR family protein	11	34.9	87.2	1.32	767	1919.48	52.4	0.42	1
MSMEG_0332	-	2-nitropropane dioxygenase, NPD	7	72.1	117.9	0.71	1009.6	1650.03	45.7	0.52	1
MSMEG_0333	-	carboxyl transferase domain-containing protein	21	76.8	146.9	0.94	3225.3	6170.95	70.1	0.31	1
MSMEG_0334	-	acetyl-/propionyl-coenzyme A carboxylase alpha chain	19	56.9	90.4	0.67	2161.7	3433.3	33.5	0.68	1
MSMEG_0335	-	enoyl-CoA hydratase/isomerase	5	77.6	51.9	-0.58	776.2	519.09	-25.7	0.52	1
MSMEG_0336	-	hypothetical protein MSMEG_0336	2	86.7	40.7	-1.09	346.8	162.98	-45.9	0.28	1
MSMEG_0337	-	hypothetical protein MSMEG_0337	18	104.1	120.6	0.21	3746	4341.24	16.5	0.81	1
MSMEG_0338	-	acyl-CoA dehydrogenase fadE12	16	116.7	122	0.06	3735.2	3903.89	5.3	0.92	1
MSMEG_0339	-	FMN-dependent monooxygenase	15	82.8	76.9	-0.11	2482.8	2306.11	-5.9	0.83	1
MSMEG_0340	-	enoyl-CoA hydratase/isomerase family protein	5	121.2	77.8	-0.64	1211.8	777.67	-43.4	0.4	1
MSMEG_0341c	-	hypothetical protein MSMEG_0341	8	39.8	37.5	-0.08	636.3	600.71	-2.2	0.93	1
MSMEG_0342c	-	hypothetical protein MSMEG_0342	19	152.8	187.4	0.29	5807.9	7119.36	34.5	0.66	1
MSMEG_0343c	-	TetR-family protein transcriptional regulator	6	30.2	28.7	-0.07	362	344.6	-1.4	0.96	1
MSMEG_0344	-	hypothetical protein MSMEG_0344	7	56	395.8	2.82	783.5	5540.63	339.8	0.38	1
MSMEG_0345	-	hypothetical protein MSMEG_0345	15	151.7	293.8	0.95	4550.5	8814.03	142.1	0.38	1
MSMEG_0346	-	virulence factor	14	79	62.1	-0.35	2213.2	1737.6	-17	0.54	1
MSMEG_0347	-	virulence factor Mce family protein	13	56.4	67.5	0.26	1466.3	1754.8	11.1	0.67	1
MSMEG_0348	-	mce-family protein mce3c	22	148.8	155.9	0.07	6547.4	6860.65	7.1	0.98	1
MSMEG_0349	-	virulence factor mce family protein	8	205.8	111.2	-0.89	3292.7	1778.86	-94.6	0.34	1
MSMEG_0350	-	virulence factor Mce family protein	6	28.2	46.3	0.71	338.7	555.31	18.1	0.58	1
MSMEG_0351	-	virulence factor mce family protein	22	99.6	118.6	0.25	4382.9	5217.21	19	0.58	1
MSMEG_0352	-	hypothetical protein MSMEG_0352	6	22.1	27.3	0.3	265.6	327.91	5.2	0.64	1
MSMEG_0353	-	hypothetical protein MSMEG_0353	6	259.3	93	-1.48	3112.1	1116.58	-166.3	0.49	1
MSMEG_0354	-	hypothetical protein MSMEG_0354	8	56	46.4	-0.27	895.7	741.84	-9.6	0.78	1
MSMEG_0355	-	hypothetical protein MSMEG_0355	5	106.5	82.9	-0.36	1065	828.63	-23.6	0.71	1
MSMEG_0356c	-	acetyltransferase	5	198	175.3	-0.17	1979.5	1753.39	-22.6	0.86	1
MSMEG_0357	-	transmembrane transport protein	6	95.4	283.3	1.57	1144.6	3399.42	187.9	0.35	1
MSMEG_0358	-	ribonucleotide-diphosphate reductase subunit beta	9	185.1	187.9	0.02	3331.5	3382.08	2.8	0.95	1
MSMEG_0359c	-	hypothetical protein MSMEG_0359	22	0.1	0.7	2.9	4	30.14	0.6	1	1
MSMEG_0360c	-	hypothetical protein MSMEG_0360	2	0	0	0	0	0	0	1	1
MSMEG_0361	-	glycosyl hydrolase family protein 3	11	177.5	159.2	-0.16	3904.2	3502.24	-18.3	0.77	1
MSMEG_0362c	-	amidohydrolase 2	12	132.4	80.4	-0.72	3178.3	1928.52	-52.1	0.24	1
MSMEG_0363	-	TetR-family protein regulatory protein	8	88.2	193.9	1.14	1412	3101.78	105.6	0.63	1
MSMEG_0364	-	hypothetical protein MSMEG_0364	1	10.7	16.3	0.61	21.4	32.6	5.6	1	1
MSMEG_0365	-	hypothetical protein MSMEG_0365	16	148.8	73.9	-1.01	4761	2364.57	-74.9	0.069	1
MSMEG_0366	-	hypothetical protein MSMEG_0366	4	180.2	106.9	-0.75	1441.5	855.54	-73.2	0.12	1
MSMEG_0367c	-	O-demethylpuromycin-O-methyltransferase	9	232.2	271.4	0.23	4179.2	4885.55	39.2	0.9	1
MSMEG_0368	-	hypothetical protein MSMEG_0368	10	66.6	151.8	1.19	1332.7	3036.45	85.2	0.8	1
MSMEG_0369	-	hypothetical protein MSMEG_0369	7	16.6	70.3	2.08	232.8	983.87	53.7	0.25	1
MSMEG_0370	-	hypothetical protein MSMEG_0370	33	88.8	145.5	0.71	5858.2	9604.39	56.8	0.28	1
MSMEG_0371c	-	MaoC like domain-containing protein	7	44.7	20.6	-1.12	625.6	288.72	-24.1	0.14	1
MSMEG_0372c	fabG	3-ketoacyl-(acyl-carrier-protein) reductase	9	76.2	46.6	-0.71	1370.8	838.21	-29.6	0.2	1
MSMEG_0373	-	acetyl-CoA acetyltransferase	11	154.5	215.3	0.48	3399	4736.15	60.8	0.35	1
MSMEG_0374c	-	glycolate oxidase subunit	13	83.1	39.9	-1.06	2160.7	1037.67	-43.2	0.14	1
MSMEG_0375c	-	phospholipase D family protein	18	119.6	138.6	0.21	4306	4989.02	19	0.67	1
MSMEG_0376	-	transcriptional regulator, AraC family protein	10	63.3	112.9	0.84	1265.4	2258.65	49.7	0.66	1
MSMEG_0377	-	nitrile hydratase	16	189.2	148.2	-0.35	6052.9	4741.44	-41	0.56	1
MSMEG_0378	nthA	nitrile hydratase, alpha subunit	6	65.4	85.4	0.38	784.4	1024.22	20	0.8	1
MSMEG_0379	-	nitrile hydratase activator P14k	3	186.8	215.6	0.21	1120.5	1293.53	28.8	0.83	1
MSMEG_0380	-	MmpS4 protein	6	90	78.9	-0.19	1080.1	947.39	-11.1	0.86	1
MSMEG_0382	-	putative transport protein	40	137.1	79.7	-0.78	10966.1	6379.2	-57.3	0.0048	1
MSMEG_0383c	-	hypothetical protein MSMEG_0383	5	92.6	190.8	1.04	925.7	1907.83	98.2	0.22	1
MSMEG_0384c	rfbA	glucose-1-phosphate thymidylyltransferase	18	0.1	0	-0.15	4	0	-0.1	1	1
MSMEG_0385	-	glycosyl transferase	22	279.5	305.7	0.13	12296.3	13450.5	26.2	0.81	1
MSMEG_0386	-	NAD dependent epimerase/dehydratase family protein	19	11.6	4	-1.54	440.1	150.96	-7.6	0.41	1
MSMEG_0387	-	Rmt2 protein	17	594.8	486.2	-0.29	20222.5	16531.7	-108.6	0.64	1
MSMEG_0388	tylF	macrocin-O-methyltransferase	8	76	103.2	0.44	1216.6	1651.84	27.2	0.47	1
MSMEG_0389	-	glycosyl transferase	15	0.5	0.3	-0.8	16.2	9.31	-0.2	0.79	1
MSMEG_0390	-	putative acyltransferase	29	199.5	211.2	0.08	11569.1	12250.1	11.7	0.89	1
MSMEG_0391	-	Rmt3 protein	14	159.5	223.5	0.49	4465	6256.94	64	0.3	1
MSMEG_0392c	-	glycosyl transferase	24	88.6	52.5	-0.76	4254.5	2518.24	-36.2	0.51	1
MSMEG_0393	-	Fmt protein	25	166.7	132.4	-0.33	8336.7	6618.5	-34.4	0.53	1
MSMEG_0394	-	hypothetical protein MSMEG_0394	2	0	0	0	0	0	0	1	1
MSMEG_0395	-	hypothetical protein MSMEG_0395	0	0	0	0	0	0	0	1	1
MSMEG_0396c	-	hypothetical protein MSMEG_0396	6	304.7	335.6	0.14	3655.8	4027.16	30.9	0.77	1
MSMEG_0397	-	IS1096, tnpA protein	9	542.8	525.7	-0.05	9770.8	9463.37	-17.1	0.98	1
MSMEG_0398c	-	IS1096, tnpR protein	10	389.7	294	-0.41	7793.3	5879.75	-95.7	0.42	1
MSMEG_0399	-	hypothetical protein MSMEG_0399	2	140.8	220	0.64	563.3	880.12	79.2	0.96	1
MSMEG_0400	-	peptide synthetase	79	385.2	526.7	0.45	60859.8	83220.5	141.5	0.12	1
MSMEG_0401	-	putative non-ribosomal peptide synthase	33	198.1	381	0.94	13071.5	25143.6	182.9	0.21	1
MSMEG_0402	-	linear gramicidin synthetase subunit D	84	255.2	322.4	0.34	42874.5	54155.7	67.1	0.15	1
MSMEG_0403	-	integral membrane protein	10	292	284.9	-0.04	5840.7	5698.26	-7.1	0.95	1
MSMEG_0404	-	sigma associated protein	5	165.4	161.7	-0.03	1654.4	1617.04	-3.7	0.97	1
MSMEG_0405	-	extra cytoplasmic sigma factor	15	241.9	438.3	0.86	7256	13150	196.5	0.55	1
MSMEG_0406c	-	acyl-CoA-dehydrogenase	20	243	196.8	-0.3	9720.7	7872.3	-46.2	0.51	1
MSMEG_0407	-	hypothetical protein MSMEG_0407	8	186.2	300.9	0.69	2979.7	4815.19	114.7	0.35	1
MSMEG_0408c	-	type I modular polyketide synthase	86	129	105.3	-0.29	22183.7	18117	-23.6	0.33	1
MSMEG_0409	-	condensation domain-containing protein	22	68	106.7	0.65	2993.6	4696.83	38.7	0.24	1
MSMEG_0410	-	MmpL protein	25	203.3	562.4	1.47	10163.1	28122.1	359.2	0.051	1
MSMEG_0411	-	acyl-CoA synthetase	17	230.7	72.4	-1.67	7842.5	2460.93	-158.3	0.1	1
MSMEG_0412	-	hypothetical protein MSMEG_0412	18	196.1	466.4	1.25	7058.1	16790.7	270.4	0.18	1
MSMEG_0413c	-	hypothetical protein MSMEG_0413	4	207	365	0.82	1655.8	2920.16	158	0.61	1
MSMEG_0414	-	oxidoreductase, 2OG-Fe(II) oxygenase family protein	11	216.3	319	0.56	4757.8	7018.34	102.8	0.44	1
MSMEG_0415	-	NADH-FMN oxidoreductase	1	94.7	90.8	-0.06	189.3	181.61	-3.9	1	1
MSMEG_0416c	-	hypothetical protein MSMEG_0416	3	335.1	512	0.61	2010.3	3071.76	176.9	0.7	1
MSMEG_0417c	-	fumarate reductase iron-sulfur subunit	7	185.2	119.7	-0.63	2592.1	1676.41	-65.4	0.47	1
MSMEG_0418c	sdhA	succinate dehydrogenase flavoprotein subunit	20	146.7	162.9	0.15	5868.7	6516.05	16.2	0.77	1
MSMEG_0419c	-	integral membrane protein	18	134.8	127.9	-0.08	4852.3	4604.47	-6.9	0.86	1
MSMEG_0420c	-	hypothetical protein MSMEG_0420	4	96.7	754.1	2.96	773.6	6032.83	657.4	0.96	1
MSMEG_0421	-	hypothetical protein MSMEG_0421	2	0	4.7	2.5	0	18.63	4.7	1	1
MSMEG_0422	-	transferase	2	9.6	0	-3.41	38.4	0	-9.6	1	1
MSMEG_0423	-	hypothetical protein MSMEG_0423	4	270.9	304.9	0.17	2167	2439.09	34	0.81	1
MSMEG_0424c	-	Hsp20/alpha crystallin family protein	6	173.4	280.7	0.7	2080.7	3368.63	107.3	0.62	1
MSMEG_0425c	-	putative membrane protein DcsA	8	42.3	23.9	-0.82	676.1	381.85	-18.4	0.51	1
MSMEG_0426	-	transcriptional regulator, GntR family protein	18	71.5	98.2	0.46	2574.6	3534.98	26.7	0.54	1
MSMEG_0427	nirB	nitrite reductase	28	87.2	123.5	0.5	4883.6	6917.06	36.3	0.34	1
MSMEG_0428	-	nitrite reductase	4	20.6	68	1.72	165	543.8	47.3	0.13	1
MSMEG_0429c	-	putative ferric uptake regulator	5	110.2	239	1.12	1101.7	2390.46	128.9	0.35	1
MSMEG_0430	-	ISMsm4, transposase	16	178.1	156.8	-0.18	5700.6	5018.01	-21.3	0.67	1
MSMEG_0431c	-	secreted protein	10	134.8	359.7	1.42	2695.6	7193.64	224.9	0.27	1
MSMEG_0432c	-	bifunctional uroporphyrinogen-III synthetase/response regulator domain-containing protein	6	175.5	257.8	0.56	2105.5	3094.02	82.4	0.71	1
MSMEG_0433c	-	nitrite extrusion protein	17	291.6	280.2	-0.06	9913.3	9527.01	-11.4	0.91	1
MSMEG_0434c	-	aminoglycoside 2'-N-acetyltransferase (AAC(2')-Id)	5	314.4	265.7	-0.24	3143.8	2656.65	-48.7	0.82	1
MSMEG_0435c	-	allophanate hydrolase subunit 2	9	127.2	222.2	0.81	2288.8	3999.49	95	0.36	1
MSMEG_0436c	-	allophanate hydrolase subunit 1	6	39.3	40	0.03	471.3	479.64	0.7	0.95	1
MSMEG_0437c	-	hypothetical protein MSMEG_0437	12	498.5	472.5	-0.08	11963.7	11340.9	-25.9	0.87	1
MSMEG_0438c	-	periplasmic binding protein	4	141.2	169.7	0.26	1130	1357.69	28.5	0.64	1
MSMEG_0439c	-	hypothetical protein MSMEG_0439	5	177	124	-0.51	1770	1240.11	-53	0.35	1
MSMEG_0440c	-	hypothetical protein MSMEG_0440	0	0	0	0	0	0	0	1	1
MSMEG_0441c	-	hypothetical protein MSMEG_0441	9	209	117.3	-0.83	3762.2	2111.3	-91.7	0.17	1
MSMEG_0442c	-	tetracycline repressor domain-containing protein	5	295.7	272.8	-0.12	2956.8	2728.06	-22.9	0.89	1
MSMEG_0443	-	hydrolase, carbon-nitrogen family protein	15	154	107.7	-0.52	4620.5	3231.25	-46.3	0.3	1
MSMEG_0444	-	agmatine deiminase	8	141.5	290	1.04	2264	4639.8	148.5	0.72	1
MSMEG_0445	-	amidohydrolase family protein	19	81	112.5	0.47	3077.5	4275.91	31.5	0.41	1
MSMEG_0446	-	putrescine importer	20	204.9	244.9	0.26	8197.6	9795.8	40	0.55	1
MSMEG_0447c	-	hypothetical protein MSMEG_0447	2	227.5	108.8	-1.06	910.1	435.27	-118.7	0.27	1
MSMEG_0448	-	transcriptional regulator, MarR family protein	7	411.6	577.4	0.49	5762.4	8083.05	165.8	0.68	1
MSMEG_0449c	-	transporter, major facilitator family protein, putative	16	230.2	147.4	-0.64	7365.2	4717.64	-82.7	0.13	1
MSMEG_0450	-	hypothetical protein MSMEG_0450	2	200.7	75.7	-1.41	802.8	302.69	-125	0.16	1
MSMEG_0451c	-	oxidoreductase, FAD-linked	1	377.9	1048.2	1.47	755.9	2096.44	670.3	0.36	1
MSMEG_0452c	-	inner membrane permease YgbN	10	140.6	369.4	1.39	2812.7	7388.19	228.8	0.6	1
MSMEG_0453c	aroK	shikimate kinase	6	76.4	110.4	0.53	916.9	1324.58	34	0.5	1
MSMEG_0454	-	GntR-family protein transcriptional regulator	3	64.1	83	0.37	384.5	498.27	19	0.84	1
MSMEG_0455	-	aldehyde dehydrogenase	17	125.4	159.6	0.35	4263.8	5426.25	34.2	0.54	1
MSMEG_0456c	-	DNA gyrase subunit A	14	66.6	196.5	1.56	1865.7	5501.42	129.8	0.1	1
MSMEG_0457c	-	DNA topoisomerase IV subunit B	11	302.7	256.7	-0.24	6659.8	5646.8	-46	0.77	1
MSMEG_0458	-	two-component system sensor kinase	8	149.3	135.1	-0.15	2389.6	2160.98	-14.3	0.8	1
MSMEG_0459	-	two-component system response regulator	6	229.5	135.4	-0.76	2754.1	1624.67	-94.1	0.26	1
MSMEG_0460c	-	alpha/beta hydrolase fold	7	146.1	426.3	1.55	2045.1	5968.39	280.2	0.58	1
MSMEG_0461	-	CinZ protein	7	240.2	145.6	-0.72	3362.3	2038.09	-94.6	0.19	1
MSMEG_0462	-	MmpS4 protein	8	77.5	271.2	1.81	1240.3	4339.69	193.7	0.097	1
MSMEG_0463	-	MmpL4 protein	33	167.5	223.1	0.41	11052.9	14726.5	55.7	0.56	1
MSMEG_0464c	-	phosphomethylpyrimidine kinase	7	213.8	226.8	0.08	2993.7	3175.11	13	0.89	1
MSMEG_0465	-	transcriptional regulator, TetR family protein	6	393	703.4	0.84	4716.2	8440.87	310.4	0.48	1
MSMEG_0466	-	hypothetical protein MSMEG_0466	11	436.1	467.6	0.1	9594.3	10286.7	31.5	0.84	1
MSMEG_0467c	-	membrane transport protein	3	88.8	39.2	-1.18	532.6	235.03	-49.6	0.96	1
MSMEG_0468c	-	integral membrane protein	5	197.9	116.9	-0.76	1979.3	1168.57	-81.1	0.26	1
MSMEG_0469	-	transcriptional regulatory protein PadR-	12	212.9	240.2	0.17	5110.5	5763.71	27.2	0.83	1
MSMEG_0470c	-	para-nitrobenzyl esterase	27	98.1	115.8	0.24	5297.5	6252.82	17.7	0.74	1
MSMEG_0471	-	transcriptional regulator LysR family protein	4	43.4	9.3	-2.22	347.4	74.51	-34.1	0.41	1
MSMEG_0472c	-	putative lipoprotein	8	115.4	162.1	0.49	1846.2	2593.02	46.7	0.57	1
MSMEG_0473	-	transcriptional regulator, LuxR family protein	8	135.3	88.7	-0.61	2164.9	1418.74	-46.6	0.46	1
MSMEG_0474	-	glucosamine--fructose-6-phosphate aminotransferase (isomerizing)	14	63.1	48.6	-0.38	1767.2	1359.5	-14.6	0.51	1
MSMEG_0475	-	nucleotide-sugar dehydrogenase	12	195.5	243.6	0.32	4692.6	5846.91	48.1	0.63	1
MSMEG_0476	-	chitin synthase	29	152	96.3	-0.66	8817.7	5586.9	-55.7	0.077	1
MSMEG_0477c	-	hypothetical protein MSMEG_0477	7	200.7	334.2	0.74	2809.2	4678.72	133.5	0.2	1
MSMEG_0478	-	secreted protein, putative	19	171.2	195.6	0.19	6504	7434.33	24.5	0.78	1
MSMEG_0479	-	hypothetical protein MSMEG_0479	6	231.4	358.1	0.63	2776.8	4296.87	126.7	0.36	1
MSMEG_0480c	-	transcriptional regulator, GntR family protein	5	191.5	279.3	0.54	1914.6	2793.39	87.9	0.8	1
MSMEG_0481	-	FAD dependent oxidoreductase	18	222.7	120.7	-0.88	8016.8	4346.26	-102	0.11	1
MSMEG_0482	-	dihydroxy-acid dehydratase	15	135.9	121.2	-0.16	4077.7	3637.29	-14.7	0.88	1
MSMEG_0483	-	shikimate transporter	23	66.2	26.4	-1.33	3045.5	1212.17	-39.9	0.013	1
MSMEG_0484c	-	formamidase	10	289.1	380.5	0.4	5782.3	7610.93	91.4	0.91	1
MSMEG_0485c	-	amidase	21	143.5	155.6	0.12	6025.5	6535.19	12.1	0.82	1
MSMEG_0486c	-	putative ABC transporter, periplasmic protein	15	75	136.8	0.87	2249.1	4104.14	61.8	0.71	1
MSMEG_0487c	-	ABC transporter permease	11	30.6	295.1	3.27	674	6492.8	264.5	0.016	1
MSMEG_0488c	-	ABC transporter ATP-binding protein	14	82	85.8	0.06	2296.7	2402.48	3.8	0.96	1
MSMEG_0489	-	racemase	17	52.4	117.1	1.16	1782.9	3983.07	64.7	0.44	1
MSMEG_0490	-	enoyl-CoA hydratase	9	41.4	74.8	0.85	745	1346.57	33.4	0.33	1
MSMEG_0491c	-	transcriptional regulator, LacI family protein	19	52.6	43.6	-0.27	1999.6	1655.33	-9.1	0.67	1
MSMEG_0492c	-	hypothetical protein MSMEG_0492	7	116.8	81	-0.53	1635.5	1133.78	-35.8	0.41	1
MSMEG_0493c	-	hypothetical protein MSMEG_0493	0	0	0	0	0	0	0	1	1
MSMEG_0494c	-	hypothetical protein MSMEG_0494	1	16.6	473.2	4.83	33.3	946.36	456.5	0.32	1
MSMEG_0496c	-	coenzyme B12-dependent glycerol dehydrogenase small subunit	2	18.7	87.1	2.22	74.9	348.22	68.3	0.3	1
MSMEG_0497c	-	glycerol dehydratase large subunit	19	70	103.2	0.56	2659.6	3922.39	33.2	0.74	1
MSMEG_0498c	-	hypothetical protein MSMEG_0498	0	0	0	0	0	0	0	1	1
MSMEG_0499	-	amino acid permease-associated region	17	243.1	241.7	-0.01	8265.7	8216.4	-1.4	0.99	1
MSMEG_0500	-	regulator of polyketide synthase expression, putative	7	156.7	125.6	-0.32	2194	1758.94	-31.1	0.82	1
MSMEG_0501c	-	glucosamine-6-phosphate deaminase 1	6	103.9	40.7	-1.35	1246.4	488.95	-63.1	0.43	1
MSMEG_0502c	-	glucosidase	16	41.6	145.1	1.8	1330.2	4644.19	103.6	0.11	1
MSMEG_0503c	-	DeoR-family protein transcriptional regulator	5	66.8	115	0.78	667.7	1149.95	48.2	0.54	1
MSMEG_0504	-	carbohydrate kinase	9	120.1	109.5	-0.13	2161.5	1971.6	-10.5	0.91	1
MSMEG_0505	-	sugar ABC transporter, substrate-binding protein, putative	19	52.8	85.2	0.69	2005.1	3237.98	32.4	0.31	1
MSMEG_0506	-	ABC transporter, permease protein	11	32.8	43.7	0.41	721.6	960.45	10.9	0.54	1
MSMEG_0507	-	sugar ABC transporter, permease protein	7	95.6	31.6	-1.6	1338.7	441.87	-64.1	0.14	1
MSMEG_0508	-	glycerol-phosphate porter	12	46	127.4	1.47	1103.4	3058.7	81.5	0.23	1
MSMEG_0509c	-	transcriptional regulatory protein	1	194.8	69.9	-1.48	389.7	139.7	-125	0.73	1
MSMEG_0510	-	D-tagatose-bisphosphate aldolase, class II, non-catalytic subunit	22	104.2	167.5	0.68	4585.8	7371.74	63.3	0.36	1
MSMEG_0511	-	putative sugar isomerase, AgaS family protein	11	91.5	72.1	-0.34	2013.6	1587.3	-19.4	0.7	1
MSMEG_0512	-	BadF/BadG/BcrA/BcrD ATPase family protein	13	15.9	57.1	1.85	412.8	1484.98	41.2	0.6	1
MSMEG_0513	-	integral membrane protein	10	38.4	33.5	-0.2	768.3	669.53	-4.9	0.75	1
MSMEG_0514	-	alpha-galactosidase	24	82.5	111.3	0.43	3960.1	5343.99	28.8	0.54	1
MSMEG_0515	-	sugar transporter sugar binding lipoprotein	15	43.3	55.1	0.35	1298.4	1654.17	11.9	0.58	1
MSMEG_0516	-	sugar transport system	15	111.9	239	1.09	3356.8	7168.79	127.1	0.23	1
MSMEG_0517	-	sugar binding-protein dependent transporter system permease	5	57	39.1	-0.55	570	390.65	-17.9	0.5	1
MSMEG_0518	-	sn-glycerol-3-phosphate ABC transporter ATPase	14	128.6	272	1.08	3601.1	7617.12	143.4	0.088	1
MSMEG_0519	-	hypothetical protein MSMEG_0519	5	39.6	78.5	0.99	395.7	784.92	38.9	0.67	1
MSMEG_0520	-	porin	5	181.1	132.4	-0.45	1810.7	1323.67	-48.7	0.55	1
MSMEG_0522	-	pp24 protein	1	67.8	34.9	-0.96	135.6	69.85	-32.9	0.67	1
MSMEG_0523c	-	DNA-binding protein	11	93.3	164.1	0.81	2053.3	3610.52	70.8	0.43	1
MSMEG_0524c	-	short chain dehydrogenase	5	77	135.5	0.81	770.4	1355.1	58.5	0.42	1
MSMEG_0525	-	hypothetical protein MSMEG_0525	3	29.9	8.5	-1.81	179.4	51.22	-21.4	1	1
MSMEG_0526	-	oxidoreductase, GMC family protein	21	69.9	78.5	0.17	2936.9	3298.38	8.6	0.78	1
MSMEG_0527	-	2-hydroxycyclohexnecarboxyl-CoA dehydrogenase	5	41.3	221.2	2.42	413.3	2211.57	179.8	0.1	1
MSMEG_0528	-	hypothetical protein MSMEG_0528	9	44.4	128.2	1.53	799.2	2307.67	83.8	0.15	1
MSMEG_0529c	-	serine/threonine-protein kinase PknK	30	83.8	106.4	0.34	5029.1	6385.54	22.6	0.51	1
MSMEG_0530c	-	short chain dehydrogenase	9	115.2	159	0.46	2073.9	2862.33	43.8	0.75	1
MSMEG_0531c	-	putative acyl-CoA dehydrogenase	8	129.7	324.5	1.32	2074.5	5192.26	194.9	0.21	1
MSMEG_0532c	-	transcriptional regulator, TetR family protein	5	129.3	162.2	0.33	1292.7	1621.7	32.9	0.69	1
MSMEG_0533c	-	gp236 protein	5	114.2	202.1	0.82	1141.5	2020.76	87.9	0.43	1
MSMEG_0534c	-	permease, major facilitator family protein	15	213.2	129.6	-0.72	6396.5	3886.81	-83.7	0.29	1
MSMEG_0535c	-	GntR-family protein transcriptional regulator	6	149.4	84	-0.83	1792.5	1007.67	-65.4	0.55	1
MSMEG_0536c	-	intracellular protease, PfpI family protein	2	801.2	1071.2	0.42	3204.9	4284.98	270	0.67	1
MSMEG_0537c	-	hypothetical protein MSMEG_0537	8	529.7	469.5	-0.17	8474.7	7511.28	-60.2	0.8	1
MSMEG_0538c	-	regulatory protein, MarR	3	160	290	0.86	960.1	1740.19	130	0.42	1
MSMEG_0539c	-	transcriptional regulator, Crp/Fnr family protein	3	656.6	811.3	0.31	3939.7	4867.57	154.6	0.75	1
MSMEG_0540	-	transcriptional regulator, putative	8	491.7	556.3	0.18	7867.8	8901.6	64.6	0.76	1
MSMEG_0541	-	hypothetical protein MSMEG_0541	2	285.4	494.8	0.79	1141.6	1979.37	209.4	0.35	1
MSMEG_0542	-	ANTAR domain-containing protein	6	271.8	520.7	0.94	3261.2	6248.31	248.9	0.39	1
MSMEG_0543c	-	hypothetical protein MSMEG_0543	10	105.6	76.9	-0.46	2111.8	1537.76	-28.7	0.61	1
MSMEG_0544	-	transcriptional regulator	9	67	78.6	0.23	1205.8	1414.35	11.6	0.7	1
MSMEG_0545c	-	transcriptional regulator, LuxR family protein	3	61.2	52.8	-0.21	367	316.66	-8.4	0.87	1
MSMEG_0546c	-	hypothetical protein MSMEG_0546	14	308.4	258.3	-0.26	8635.4	7233.42	-50.1	0.5	1
MSMEG_0547c	-	ISMsm5, transposase	9	242.8	193.7	-0.33	4371.3	3487.11	-49.1	0.54	1
MSMEG_0548	-	chromosome replication initiation inhibitor protein	6	192.4	341.6	0.83	2308.7	4099.48	149.2	0.37	1
MSMEG_0549c	-	ABC transporter, permease protein	3	26.1	213	3.03	156.5	1277.89	186.9	0.7	1
MSMEG_0550c	-	sulfonate binding protein	10	206.6	131.9	-0.65	4131.6	2638.28	-74.7	0.47	1
MSMEG_0551c	-	ABC nitrate/sulfonate/bicarbonate transporter, ATPase subunit	4	59.7	65.8	0.14	477.4	526.21	6.1	0.84	1
MSMEG_0552	-	hypothetical protein MSMEG_0552	4	36.4	18.6	-0.97	291	149.01	-17.7	0.52	1
MSMEG_0553	-	sugar ABC transporter, substrate-binding protein, putative	17	39.7	278.1	2.81	1349.3	9456.95	238.5	0.21	1
MSMEG_0554	-	ABC transporter permease protein, putative	8	116.4	35.6	-1.71	1861.6	570.32	-80.7	0.33	1
MSMEG_0555	-	ABC transporter permease protein	9	136.3	165.9	0.28	2453.6	2986.12	29.6	0.77	1
MSMEG_0556	-	ABC transporter, nucleotide binding/ATPase protein	6	233	118.3	-0.98	2795.8	1419.26	-114.7	0.21	1
MSMEG_0557	-	hypothetical protein MSMEG_0557	1	49.1	195.1	1.99	98.3	390.13	145.9	0.39	1
MSMEG_0558	-	hypothetical protein MSMEG_0558	2	99.5	37.3	-1.42	398	149.01	-62.2	0.56	1
MSMEG_0559c	-	hypothetical protein MSMEG_0559	3	53.8	147.7	1.46	322.9	885.94	93.8	0.49	1
MSMEG_0560c	dapB	dihydrodipicolinate reductase N-terminus domain-containing protein	11	212.8	245.1	0.2	4680.9	5391.84	32.3	0.74	1
MSMEG_0561	-	putative TetR family protein receptor protein	5	364.8	233.9	-0.64	3647.7	2338.57	-130.9	0.42	1
MSMEG_0562c	-	hypothetical protein MSMEG_0562	5	563.3	643.4	0.19	5632.8	6434.19	80.1	0.81	1
MSMEG_0563	-	hypothetical protein MSMEG_0563	9	128.9	340.2	1.4	2321.1	6122.96	211.2	0.38	1
MSMEG_0564c	-	xanthine/uracil permease	5	301.2	118	-1.35	3011.8	1180.34	-183.1	0.11	1
MSMEG_0565c	-	putative glycosyl transferases group 1	11	82.9	54.3	-0.61	1823.1	1193.8	-28.6	0.29	1
MSMEG_0566c	-	aliphatic amidase	10	155.7	131.5	-0.24	3113.3	2629.5	-24.2	0.72	1
MSMEG_0567c	-	selenophosphate synthetase	9	106.1	219.9	1.05	1909.6	3958.23	113.8	0.94	1
MSMEG_0568c	-	radical SAM domain-containing protein	11	45.5	146.2	1.69	1000	3216.52	100.8	0.26	1
MSMEG_0569c	-	flavoprotein involved in K+ transport	19	126.9	53.3	-1.25	4823.6	2026.06	-73.6	0.18	1
MSMEG_0570c	-	hypothetical protein MSMEG_0570	4	21.2	44.7	1.07	169.8	357.28	23.4	0.6	1
MSMEG_0571c	-	hydrolase, carbon-nitrogen family protein	12	70.7	41.9	-0.75	1695.6	1005.33	-28.8	0.15	1
MSMEG_0572c	-	hypothetical protein MSMEG_0572	10	114.5	89.9	-0.35	2290.9	1798.91	-24.6	0.54	1
MSMEG_0573c	-	putative ECF sigma factor RpoE1	9	6.4	5.8	-0.14	115.3	104.65	-0.6	0.92	1
MSMEG_0574	-	putative ECF sigma factor RpoE1	10	50.4	33.9	-0.57	1008.9	677.42	-16.6	0.52	1
MSMEG_0575	-	MmpS1 protein	4	51.8	51.8	0	414.2	414.45	0	1	1
MSMEG_0576	-	MmpL4 protein	28	75.6	116.5	0.62	4231.5	6522.28	40.9	0.5	1
MSMEG_0577	-	major facilitator superfamily protein, putative	11	87.4	92	0.07	1922.8	2023.6	4.6	0.9	1
MSMEG_0578	-	acyl-CoA dehydrogenase middle domain-containing protein	13	133.2	135.5	0.02	3464.5	3523.59	2.3	0.97	1
MSMEG_0579c	-	helix-turn-helix, Fis-type	6	100.9	44.6	-1.18	1211	535.26	-56.3	0.31	1
MSMEG_0580	-	hypothetical protein MSMEG_0580	8	70.1	75.1	0.1	1121.5	1201.56	5	0.83	1
MSMEG_0581	gabT	4-aminobutyrate transaminase	10	191.7	404.2	1.08	3833.5	8083.97	212.5	0.85	1
MSMEG_0582	-	succinic semialdehyde dehydrogenase	10	44.3	69.7	0.65	885.8	1394.17	25.4	0.47	1
MSMEG_0583c	-	hypothetical protein MSMEG_0583	4	91.7	416.3	2.18	733.2	3330.61	324.7	0.71	1
MSMEG_0584c	-	hypothetical protein MSMEG_0584	9	330.8	235.1	-0.49	5953.5	4231.53	-95.7	0.48	1
MSMEG_0585	-	L-carnitine dehydratase/bile acid-inducible protein F	8	372.1	264.5	-0.49	5953.5	4231.53	-107.6	0.54	1
MSMEG_0586c	-	STAS domain-containing protein	3	119.1	26.4	-2.17	714.5	158.33	-92.7	0.3	1
MSMEG_0587	rhaU	L-rhamnose 1-epimerase	4	272.4	588	1.11	2178.9	4703.82	315.6	0.53	1
MSMEG_0588	-	putative rhamnose tranport protein, MFS family protein	16	336.3	379	0.17	10761.9	12126.6	42.6	0.72	1
MSMEG_0589	rhaI	L-rhamnose isomerase	13	68	61.2	-0.15	1767.7	1590.27	-6.8	0.77	1
MSMEG_0590	rhaD	short chain dehydrogenase	26	58.3	99.6	0.77	3034.1	5177	41.2	0.47	1
MSMEG_0591	rhaB	rhamnulokinase	14	101.8	72.6	-0.49	2850.9	2032.65	-29.2	0.32	1
MSMEG_0592	-	putative rhamnose catabolism operon transcriptional regulator	5	87.6	51.7	-0.76	875.9	516.89	-35.9	0.39	1
MSMEG_0593c	-	hypothetical protein MSMEG_0593	3	53	10.1	-2.39	317.9	60.54	-42.9	0.2	1
MSMEG_0594c	-	iron-sulfur cluster binding protein	9	49.1	29.2	-0.75	883.8	525.95	-19.9	0.6	1
MSMEG_0595c	-	glycolate oxidase	9	259.1	172.9	-0.58	4663.9	3111.6	-86.2	0.3	1
MSMEG_0596	-	GntR family transcriptional regulator	5	285.7	214.8	-0.41	2857.4	2148.04	-70.9	0.63	1
MSMEG_0597c	-	hypothetical protein MSMEG_0597	15	161.2	234.3	0.54	4835.5	7028.44	73.1	0.68	1
MSMEG_0598	-	hypothetical protein MSMEG_0598	4	133.1	156	0.23	1064.8	1248.13	22.9	0.83	1
MSMEG_0599	-	acyl-CoA synthetase	15	233.3	295.8	0.34	6998.3	8874.29	62.5	0.54	1
MSMEG_0600	-	dehydrogenase	8	45.5	66.7	0.55	728.6	1067.81	21.2	0.45	1
MSMEG_0601c	-	hypothetical protein MSMEG_0601	3	265.6	291.2	0.13	1593.3	1746.91	25.6	0.88	1
MSMEG_0602c	-	hypothetical protein MSMEG_0602	3	334.1	163.8	-1.03	2004.5	982.56	-170.3	0.31	1
MSMEG_0603c	-	putative acyl-CoA dehydrogenase	15	131.3	175.2	0.42	3939.8	5256.68	43.9	0.5	1
MSMEG_0604c	-	glyoxylate reductase	5	197.6	325.5	0.72	1976.5	3255.32	127.9	0.55	1
MSMEG_0605c	-	hypothetical protein MSMEG_0605	11	61.5	37.1	-0.73	1353.9	816.61	-24.4	0.34	1
MSMEG_0606c	-	transcriptional regulator, TetR family protein	13	57.6	42.4	-0.44	1497.6	1102.86	-15.2	0.45	1
MSMEG_0607c	-	methyltransferase, putative, family protein	5	130	91.9	-0.5	1299.6	918.79	-38.1	0.48	1
MSMEG_0608	-	glyoxalase family protein	6	62.8	23.1	-1.44	753.2	276.94	-39.7	0.109	1
MSMEG_0609c	-	helix-turn-helix domain-containing protein	9	161.5	108.4	-0.58	2906.5	1950.9	-53.1	0.59	1
MSMEG_0610	-	beta-lactamase	7	217.5	267.1	0.3	3044.8	3739.48	49.6	0.69	1
MSMEG_0611	-	para-nitrobenzyl esterase	15	74.3	95.1	0.35	2230.1	2851.99	20.7	0.74	1
MSMEG_0612c	-	transcriptional regulator, TetR family protein	5	128.7	136.6	0.09	1286.5	1366.49	8	0.94	1
MSMEG_0613	-	hypothetical protein MSMEG_0613	10	226.3	347.6	0.62	4526.6	6951.47	121.2	0.71	1
MSMEG_0614	-	methyltransferase	10	187.9	95.2	-0.98	3758.8	1904.33	-92.7	0.059	1
MSMEG_0615	EccA3	ATPase, AAA family protein	12	70.3	65	-0.11	1686.1	1560.9	-5.2	0.85	1
MSMEG_0616	EccB3	hypothetical protein MSMEG_0616	12	49.6	46.9	-0.08	1189.4	1124.86	-2.7	0.92	1
MSMEG_0617	EccC3	ftsk/SpoIIIE family protein	37	53.9	166.5	1.63	3990.8	12320.3	112.6	0.19	1
MSMEG_0618	-	PE family protein	3	44	47.3	0.11	263.8	283.8	3.3	0.84	1
MSMEG_0619	-	PPE family protein	13	35.7	25.8	-0.47	927.1	669.53	-9.9	0.46	1
MSMEG_0620	-	PE family protein	3	72.8	49.7	-0.55	436.5	298.03	-23.1	0.63	1
MSMEG_0621	-	low molecular weight protein antigen 7	6	118.5	65.5	-0.85	1421.6	786.47	-52.9	0.32	1
MSMEG_0622	-	putative DNA-binding protein	6	40.9	5	-3.02	491.1	60.54	-35.9	0.067	1
MSMEG_0623	snm/EccD3	secretion protein Snm4	6	105.2	72.9	-0.53	1262.9	874.94	-32.3	0.36	1
MSMEG_0624	-	subtilase family protein	11	113	84.5	-0.42	2487	1859.33	-28.5	0.52	1
MSMEG_0625c	-	hypothetical protein MSMEG_0625	13	45.6	172.7	1.92	1185.1	4489.75	127.1	0.38	1
MSMEG_0626	-	hypothetical protein MSMEG_0626	5	9.4	15.4	0.71	94	153.67	6	0.8	1
MSMEG_0627c	-	glycosyl transferase, family protein 39	15	98.2	198.4	1.02	2945	5952.74	100.3	0.93	1
MSMEG_0628c	-	amidohydrolase family protein	16	72.3	194.8	1.43	2312.2	6234.86	122.6	0.27	1
MSMEG_0629	-	trans-aconitate 2-methyltransferase	7	21	63.3	1.59	293.9	886.59	42.3	0.58	1
MSMEG_0630c	-	hypothetical protein MSMEG_0630	8	91.6	57	-0.68	1465.4	912.2	-34.6	0.38	1
MSMEG_0632c	-	hypothetical protein MSMEG_0632	7	205.5	226.9	0.14	2876.4	3177.17	21.5	0.75	1
MSMEG_0633c	-	PAP2 superfamily protein	15	163.1	254.3	0.64	4894.3	7628.13	91.1	0.56	1
MSMEG_0634	-	PAP2 superfamily protein	9	104.7	145.9	0.48	1884.4	2625.62	41.2	0.68	1
MSMEG_0635	-	hypothetical protein MSMEG_0635	6	105.7	87.1	-0.28	1268.1	1044.78	-18.6	0.8	1
MSMEG_0636c	-	hypothetical protein MSMEG_0636	11	157.6	213.1	0.44	3467.6	4688.68	55.5	0.58	1
MSMEG_0637c	-	iron-sulfur binding oxidoreductase	19	157	220.8	0.49	5965.4	8390.53	63.8	0.9	1
MSMEG_0638	-	hypothetical protein MSMEG_0638	21	81.7	78.3	-0.06	3429.6	3287	-3.4	0.92	1
MSMEG_0639c	-	oligopeptide transport ATP-binding protein AppF	10	140.8	363.2	1.37	2815.6	7263.88	222.4	0.36	1
MSMEG_0640c	-	oligopeptide transport ATP-binding protein OppD	7	113.8	419.6	1.88	1593.5	5874.49	305.8	0.39	1
MSMEG_0641c	-	binding-protein-dependent transport systems inner membrane component	17	267.1	295	0.14	9082.1	10030.5	27.9	0.92	1
MSMEG_0642c	-	ABC transporter permease	14	320.9	348.7	0.12	8984.9	9763.48	27.8	0.78	1
MSMEG_0643c	-	extracellular solute-binding protein, family protein 5, putative	25	488.7	445.5	-0.13	24435.5	22275.7	-43.2	0.88	1
MSMEG_0644	-	cupin domain-containing protein	5	290.3	248.6	-0.22	2903.4	2486.3	-41.7	0.78	1
MSMEG_0645	-	putative beta-1,3-glucanase	12	179.9	211.3	0.23	4318.1	5071.55	31.4	0.73	1
MSMEG_0646c	-	putative transporter	12	89.6	188.6	1.07	2149.5	4527.26	99.1	0.29	1
MSMEG_0647c	phnC	phosphonate ABC transporter, ATP-binding protein	7	83.9	80.3	-0.06	1174.8	1124.6	-3.6	0.95	1
MSMEG_0648	-	hypothetical protein MSMEG_0648	1	40.5	41.9	0.05	80.9	83.82	1.4	1	1
MSMEG_0649c	-	phosphonate-binding periplasmic protein	7	40.9	13.1	-1.64	572.3	183.81	-27.7	0.15	1
MSMEG_0650	-	GntR-family protein transcriptional regulator	10	101.4	97.7	-0.05	2028.9	1953.23	-3.8	0.89	1
MSMEG_0651	-	hypothetical protein MSMEG_0651	12	295	198.3	-0.57	7080.9	4758.26	-96.8	0.62	1
MSMEG_0652	-	hypothetical protein MSMEG_0652	5	101.7	132.9	0.39	1017.2	1328.98	31.2	0.71	1
MSMEG_0654c	-	hypothetical protein MSMEG_0654	15	110.1	164.4	0.58	3304.1	4930.71	54.2	0.6	1
MSMEG_0655	-	glucose 1-dehydrogenase, putative	6	59.2	29.3	-1.02	710.8	351.45	-29.9	0.22	1
MSMEG_0656c	-	transcriptional regulator, TetR family protein	3	130.6	79.5	-0.72	783.6	476.92	-51.1	0.39	1
MSMEG_0657c	-	Rieske (2Fe-2S) domain-containing protein	18	75.9	60	-0.34	2731.4	2161.24	-15.8	0.68	1
MSMEG_0658c	-	polyamine ABC-transporter, inner membrane subunit	10	34.9	67.7	0.95	698.5	1353.69	32.8	0.46	1
MSMEG_0659c	-	polyamine ABC transporter permease protein	16	82.6	260.3	1.66	2644.1	8330.78	177.7	0.027	1
MSMEG_0660c	-	extracellular solute-binding protein	24	63.8	128.2	1.01	3060.7	6153.75	64.4	0.27	1
MSMEG_0661	-	glutamate-1-semialdehyde 2,1-aminomutase	12	75.7	30.6	-1.31	1817.6	733.3	-45.2	0.11	1
MSMEG_0662	-	putrescine transport ATP-binding protein PotG	10	87.6	66.6	-0.39	1751.4	1332.72	-20.9	0.47	1
MSMEG_0663c	-	TetR-family protein transcriptional regulator	4	55.5	15.1	-1.87	443.9	121.07	-40.4	0.12	1
MSMEG_0664	-	FAD dependent oxidoreductase	22	69.3	84.4	0.28	3049.4	3713.99	15.1	0.58	1
MSMEG_0665c	-	sarcosine oxidase subunit beta, putative	12	77.3	90.9	0.23	1856.2	2181.55	13.6	0.8	1
MSMEG_0666	-	acetyl-CoA synthetase, putative	16	11.3	19.1	0.75	362.2	609.77	7.7	0.4	1
MSMEG_0667	-	butyryl-CoA dehydrogenase	12	156.6	96.7	-0.7	3757.7	2321.11	-59.9	0.29	1
MSMEG_0668	-	integral membrane protein	0	0	0	0	0	0	0	1	1
MSMEG_0669c	-	hypothetical protein MSMEG_0669	2	156.5	139.1	-0.17	625.8	556.35	-17.4	0.87	1
MSMEG_0670	-	FAD dependent oxidoreductase	8	70.4	61.3	-0.2	1127.1	980.5	-9.2	0.86	1
MSMEG_0671c	-	S-(hydroxymethyl)glutathione dehydrogenase	17	211.9	231.5	0.13	7204.9	7872.59	19.6	0.8	1
MSMEG_0672c	-	hypothetical protein MSMEG_0672	2	205	156.5	-0.39	820.1	626.2	-48.5	0.73	1
MSMEG_0673c	-	hypothetical protein MSMEG_0673	2	76.3	112.3	0.56	305.3	449.24	36	0.75	1
MSMEG_0674c	-	ErfK/YbiS/YcfS/YnhG family protein	11	104.6	120.5	0.2	2300.3	2650.07	15.9	0.83	1
MSMEG_0675c	-	putative cytochrome P450 144	10	162.4	137	-0.25	3248.2	2740.47	-25.4	0.63	1
MSMEG_0676	-	putative transcriptional regulatory protein	4	67.3	166.6	1.31	538.7	1333.12	99.3	0.39	1
MSMEG_0678	dcd	deoxycytidine triphosphate deaminase	3	48	66.6	0.47	288.1	399.7	18.6	0.66	1
MSMEG_0679	-	hypothetical protein MSMEG_0679	9	145	149.8	0.05	2609.7	2697.27	4.9	0.97	1
MSMEG_0680	-	UDP-glucose 6-dehydrogenase	8	193.1	99.9	-0.95	3089.2	1598.41	-93.2	0.135	1
MSMEG_0681	-	P450 heme-thiolate protein	6	94.7	41.1	-1.2	1136.9	493.35	-53.6	0.24	1
MSMEG_0682	-	hypothetical protein MSMEG_0682	3	65.1	19.4	-1.75	390.5	116.42	-45.7	0.66	1
MSMEG_0683	-	hypothetical protein MSMEG_0683	1	596	309.7	-0.94	1192	619.34	-286.3	0.66	1
MSMEG_0684c	-	aldehyde oxidase and xanthine dehydrogenase, molybdopterin binding	25	138.7	284.9	1.04	6936.5	14247.3	146.2	0.21	1
MSMEG_0685c	-	oxidoreductase, molybdopterin-binding subunit	8	62.2	23	-1.44	995.8	367.62	-39.3	0.2	1
MSMEG_0686c	-	oxidoreductase	3	67.5	508.9	2.91	405.2	3053.67	441.4	0.99	1
MSMEG_0687c	-	hypothetical protein MSMEG_0687	11	137.7	226.4	0.72	3028.5	4979.99	88.7	0.46	1
MSMEG_0688c	-	aminotransferase AlaT	18	267.2	261.9	-0.03	9617.6	9428.06	-5.3	0.97	1
MSMEG_0689	-	hypothetical protein MSMEG_0689	2	279.8	251.4	-0.15	1119.2	1005.59	-28.4	0.99	1
MSMEG_0690c	-	iron-sulfur cluster-binding protein	20	1.3	12.3	3.22	52.9	491.55	11	0.038	1
MSMEG_0691c	-	putative transcriptional regulatory protein	8	103.6	98.7	-0.07	1657	1579.41	-4.9	0.95	1
MSMEG_0692c	-	hypothetical protein MSMEG_0692	15	137.4	137.4	0	4122.2	4122.62	0	1	1
MSMEG_0693	-	hypothetical protein MSMEG_0693	6	26.4	21.3	-0.31	316.5	256.12	-5	0.81	1
MSMEG_0695	-	isoniazid inductible protein IniA	11	55	28.5	-0.95	1209.4	626.2	-26.5	0.3	1
MSMEG_0696c	-	alanine-rich protein	0	0	0	0	0	0	0	1	1
MSMEG_0697c	-	integral membrane protein	1	0	23.3	4.6	0	46.57	23.3	1	1
MSMEG_0698	-	isoniazid inductible protein IniC	8	238	322.5	0.44	3807.4	5159.53	84.5	0.49	1
MSMEG_0699	-	hypothetical protein MSMEG_0699	8	67.2	40.7	-0.72	1075.3	651.94	-26.5	0.32	1
MSMEG_0700c	-	hypothetical protein MSMEG_0700	8	160.9	97.9	-0.72	2575.1	1565.82	-63.1	0.2	1
MSMEG_0701	-	hypothetical protein MSMEG_0701	3	212.8	856	2.01	1276.6	5136.14	643.2	0.66	1
MSMEG_0702c	-	monooxygenase	10	228.2	148.9	-0.62	4563.2	2978.62	-79.2	0.19	1
MSMEG_0703c	-	hypothetical protein MSMEG_0703	2	227.8	125.1	-0.87	911.4	500.21	-102.8	0.32	1
MSMEG_0704c	-	LpqJ protein	6	244.8	181.8	-0.43	2937.4	2181.41	-63	0.38	1
MSMEG_0705c	-	putative permease of the major facilitator superfamily protein	10	148.9	147	-0.02	2978.3	2939.94	-1.9	0.98	1
MSMEG_0706c	-	4-carboxy-4-hydroxy-2-oxoadipate aldolase	5	20.8	409.6	4.3	207.8	4095.61	388.8	0.31	1
MSMEG_0707c	-	hypothetical protein MSMEG_0707	8	49.6	25	-0.99	793.5	400.48	-24.6	0.39	1
MSMEG_0708	-	transcriptional regulator, LysR family protein	3	58.3	141.7	1.28	349.7	850.11	83.4	0.26	1
MSMEG_0709	dnaK	molecular chaperone DnaK	14	6.4	2.2	-1.5	177.9	62.74	-4.1	0.76	1
MSMEG_0710	grpE	co-chaperone GrpE	5	20.8	9.5	-1.13	207.8	95.08	-11.3	0.41	1
MSMEG_0711	dnaJ	chaperone protein DnaJ	9	22.3	140	2.65	401.7	2519.56	117.7	0.18	1
MSMEG_0712c	-	transcriptional regulator, TetR family protein	10	80.6	117.2	0.54	1611.6	2344.53	36.6	0.66	1
MSMEG_0713	-	transcriptional regulator, MerR family protein	3	32.3	5.4	-2.57	194.1	32.6	-26.9	0.35	1
MSMEG_0714c	-	acyl-CoA dehydrogenase	13	105.9	135.9	0.36	2754.2	3532.52	29.9	0.84	1
MSMEG_0715c	-	3-oxoacyl-	5	31.6	29.5	-0.1	315.7	295.31	-2	0.86	1
MSMEG_0716	-	major facilitator superfamily protein	22	104.2	132.1	0.34	4584	5812.77	27.9	0.48	1
MSMEG_0717c	-	aldose 1-epimerase subfamily protein	11	130.8	141.4	0.11	2876.8	3111.85	10.7	0.82	1
MSMEG_0718	-	acetyl-CoA synthetase	19	95.1	109.1	0.2	3613.2	4146.95	14	0.84	1
MSMEG_0719c	-	flavohemoprotein	13	114.7	117.2	0.03	2981.2	3047.43	2.5	0.94	1
MSMEG_0720c	-	integral membrane protein	8	154.4	180.1	0.22	2469.9	2881.6	25.7	0.78	1
MSMEG_0722c	-	hypothetical protein MSMEG_0722	12	75.5	104.1	0.46	1812.1	2498.46	28.6	0.6	1
MSMEG_0723c	-	hypothetical protein MSMEG_0723	10	96.3	70.3	-0.45	1925.1	1405.29	-26	0.58	1
MSMEG_0724	-	IS1137, transposase orfA	2	16	11.6	-0.46	64.1	46.57	-4.4	1	1
MSMEG_0725	-	IS1137, transposase orfB	24	88.6	87.9	-0.01	4254.9	4220.28	-0.7	0.97	1
MSMEG_0726c	-	hypothetical protein MSMEG_0726	1	2.1	32.6	3.93	4.3	65.19	30.5	1	1
MSMEG_0727c	-	hypothetical protein MSMEG_0727	1	65.4	32.6	-1.01	130.9	65.19	-32.8	0.65	1
MSMEG_0728c	-	hypothetical protein MSMEG_0728	5	89.9	318.6	1.83	898.7	3186.12	228.7	0.25	1
MSMEG_0729c	-	hypothetical protein MSMEG_0729	3	331.8	93.5	-1.83	1990.6	561	-238.3	0.021	1
MSMEG_0730c	-	oleandomycin glycosyltransferase	13	134.4	167.1	0.31	3494	4345.5	32.7	0.61	1
MSMEG_0731c	-	hypothetical protein MSMEG_0731	7	125.9	148	0.23	1763	2072.24	22.1	0.79	1
MSMEG_0732	-	chaperone ClpB	21	82	65.1	-0.33	3441.9	2734.13	-16.9	0.6	1
MSMEG_0733c	dapB	dihydrodipicolinate reductase N-terminus domain-containing protein	10	115.4	70.3	-0.71	2307.5	1405.81	-45.1	0.26	1
MSMEG_0734c	-	Rieske (2Fe-2S) domain-containing protein	17	99.3	190.9	0.94	3375.8	6491.23	91.6	0.108	1
MSMEG_0735	-	putative transcriptional regulator	5	421.3	307.6	-0.45	4213.1	3076.15	-113.7	0.59	1
MSMEG_0736	-	hypothetical protein MSMEG_0736	6	25	20.9	-0.26	300.2	251.2	-4.1	0.83	1
MSMEG_0737	-	dehydrogenase	6	156.6	98.2	-0.67	1879.3	1177.89	-58.4	0.49	1
MSMEG_0738	-	hypothetical protein MSMEG_0738	11	191.9	145.6	-0.4	4221.2	3202.91	-46.3	0.57	1
MSMEG_0739	-	spou rRNA methylase family protein	5	33.8	20.2	-0.74	337.8	202.44	-13.5	0.7	1
MSMEG_0740	-	glycosyl hydrolase family protein 76	10	175.9	232.8	0.4	3518.7	4656.72	56.9	0.6	1
MSMEG_0741	-	hypothetical protein MSMEG_0741	7	61.7	187.7	1.61	863.2	2627.44	126	0.16	1
MSMEG_0742c	-	transcriptional regulatory protein	5	94.7	80.6	-0.23	947.1	806	-14.1	0.77	1
MSMEG_0743	-	xanthine dehydrogenase	8	108.3	73.9	-0.55	1732.6	1182.03	-34.4	0.45	1
MSMEG_0744	-	carbon monoxide dehydrogenase medium chain	7	90.6	38.9	-1.22	1268.7	544.58	-51.7	0.2	1
MSMEG_0745	-	2Fe-2S-binding domain-containing protein	3	50.4	130.5	1.37	302.5	782.98	80.1	0.25	1
MSMEG_0746	-	carbon-monoxide dehydrogenase, large subunit	28	136.9	172	0.33	7663.9	9633.62	35.2	0.73	1
MSMEG_0747	-	carbon monoxide dehydrogenase F protein	5	164.8	140.7	-0.23	1647.9	1406.59	-24.1	0.88	1
MSMEG_0748	-	ATPase	12	59.5	48.6	-0.29	1427.5	1165.6	-10.9	0.73	1
MSMEG_0749	-	carbon monoxide dehydrogenase subunit G (CoxG) family protein	2	60.8	46.6	-0.38	243.1	186.27	-14.2	0.64	1
MSMEG_0750c	-	membrane protein	11	25.1	29.7	0.24	552.9	653.11	4.6	0.85	1
MSMEG_0751	-	hypothetical protein MSMEG_0751	12	80.9	107	0.4	1942.8	2568.83	26.1	0.68	1
MSMEG_0752	fbaA	fructose-bisphosphate aldolase	11	447.4	293.3	-0.61	9843.6	6452.66	-154.1	0.17	1
MSMEG_0753c	-	hypothetical protein MSMEG_0753	3	851.4	543.5	-0.65	5108.2	3261.26	-307.8	0.54	1
MSMEG_0754	-	hypothetical protein MSMEG_0754	5	136.8	99.9	-0.45	1367.8	998.73	-36.9	0.65	1
MSMEG_0755c	-	cobalt-zinc-cadmium resistance protein	6	370.4	382.6	0.05	4445.2	4590.88	12.1	0.98	1
MSMEG_0756c	-	peptidase, M50B family protein	7	145.3	328.9	1.18	2033.8	4604.35	183.6	0.14	1
MSMEG_0757	-	hypothetical protein MSMEG_0757	5	169.8	135.8	-0.32	1698.3	1357.95	-34	0.61	1
MSMEG_0758c	-	hypothetical protein MSMEG_0758	5	36.5	24.2	-0.59	364.9	242.15	-12.3	0.61	1
MSMEG_0759	purA	adenylosuccinate synthetase	18	5.6	7.8	0.49	199.9	281.6	2.3	0.46	1
MSMEG_0760	-	thioesterase family protein	5	158.3	158.4	0	1582.7	1583.67	0.1	1	1
MSMEG_0761c	-	hypothetical protein MSMEG_0761	1	271.2	81.5	-1.73	542.4	162.98	-189.7	0.33	1
MSMEG_0762c	-	cytochrome P450 FAS1	8	116.7	85.9	-0.44	1867.4	1373.73	-30.9	0.52	1
MSMEG_0763c	-	antibiotic transporter	12	158	203.7	0.37	3791.6	4887.75	45.7	0.54	1
MSMEG_0764c	-	Na+/H+ antiporter	18	143	181.6	0.34	5148.3	6538.17	38.6	0.53	1
MSMEG_0765	-	zinc finger, UBP-type	5	752.3	592.2	-0.35	7523.1	5921.8	-160.1	0.49	1
MSMEG_0766	purT	phosphoribosylglycinamide formyltransferase 2	7	303.8	269.2	-0.17	4252.6	3768.31	-34.6	0.8	1
MSMEG_0767	-	hypothetical protein MSMEG_0767	6	161.5	95.6	-0.76	1937.6	1147.49	-65.8	0.19	1
MSMEG_0768	-	hypothetical protein MSMEG_0768	4	353.1	449.7	0.35	2824.8	3597.97	96.7	0.77	1
MSMEG_0769	metZ	O-succinylhomoserine sulfhydrylase	13	135.6	201.8	0.57	3526.4	5246.46	66.2	0.45	1
MSMEG_0770	-	hypothetical protein MSMEG_0770	5	82.4	27	-1.61	823.9	270.09	-55.4	0.14	1
MSMEG_0771c	-	short chain dehydrogenase	8	265.2	406.5	0.62	4243	6504.57	141.3	0.69	1
MSMEG_0772c	-	phytase	14	180.6	112.7	-0.68	5056.5	3155.95	-67.9	0.21	1
MSMEG_0773	-	acetyltransferase	11	152.7	179.4	0.23	3360.1	3946.84	26.7	0.84	1
MSMEG_0775c	-	metallo-beta-lactamase superfamily protein	6	139	210.6	0.6	1668	2527.19	71.6	0.54	1
MSMEG_0776	-	hypothetical protein MSMEG_0776	2	67.8	213.5	1.65	271.3	854	145.7	0.69	1
MSMEG_0777	-	F420-dependent glucose-6-phosphate dehydrogenase	15	244.5	404.4	0.73	7335.9	12131.8	159.9	0.11	1
MSMEG_0778c	-	putative transcriptional regulator	6	168.9	217.5	0.36	2027	2609.84	48.6	0.56	1
MSMEG_0779c	-	short chain dehydrogenase	6	128.2	86.8	-0.56	1538.2	1041.81	-41.4	0.47	1
MSMEG_0780c	-	phosphotransferase enzyme family protein	11	60.5	43.4	-0.48	1331.4	954.11	-17.2	0.58	1
MSMEG_0781	-	amino acid permease	22	149.5	152	0.02	6578.1	6688.35	2.5	0.98	1
MSMEG_0782	-	aminotransferase class-III	17	140.3	127.3	-0.14	4769.3	4327.77	-13	0.77	1
MSMEG_0783	pta	phosphate acetyltransferase	22	113.4	156.9	0.47	4991.5	6903.21	43.4	0.43	1
MSMEG_0784	ackA	acetate kinase	13	100.2	80.2	-0.32	2605.6	2086.34	-20	0.48	1
MSMEG_0785c	-	hypothetical protein MSMEG_0785	6	132.1	69.8	-0.92	1585.7	837.69	-62.3	0.22	1
MSMEG_0787c	-	extracellular solute-binding protein, family protein 3	7	110.5	22.3	-2.31	1546.7	312	-88.2	0.028	1
MSMEG_0789c	thiE	thiamine-phosphate pyrophosphorylase	3	368	302.7	-0.28	2207.8	1816.11	-65.3	0.82	1
MSMEG_0790	-	hydrolase, NUDIX family protein	3	182.5	372.6	1.03	1095.2	2235.74	190.1	0.18	1
MSMEG_0791	thiO	glycine oxidase ThiO	7	199.4	189.7	-0.07	2791.4	2656.14	-9.7	0.94	1
MSMEG_0792	thiS	sulfur carrier protein ThiS	2	36.3	17.5	-1.06	145.3	69.85	-18.9	0.37	1
MSMEG_0793	thiG	thiazole synthase	6	25.1	3.9	-2.69	300.6	46.57	-21.2	0.26	1
MSMEG_0794	-	hypothetical protein MSMEG_0794	5	62.3	56.8	-0.13	623.5	568.12	-5.5	0.87	1
MSMEG_0795	-	ABC transporter ATP-binding protein	6	153.8	116.1	-0.41	1845	1393	-37.7	0.63	1
MSMEG_0796	-	ABC transporter integral membrane subunit	7	167.6	209.9	0.32	2346.3	2939.04	42.3	0.72	1
MSMEG_0798	-	hypothetical protein MSMEG_0798	10	113.8	81.4	-0.48	2275.3	1628.04	-32.4	0.54	1
MSMEG_0799	-	hypothetical protein MSMEG_0799	1	0	0	0	0	0	0	1	1
MSMEG_0800	-	hypothetical protein MSMEG_0800	2	64.9	92.9	0.52	259.8	371.5	27.9	0.83	1
MSMEG_0801	-	IS1096, tnpR protein	10	434.2	316.4	-0.46	8684.1	6328.61	-117.8	0.22	1
MSMEG_0802c	-	IS1096, tnpA protein	9	548.5	510.2	-0.1	9873.9	9184.49	-38.3	0.82	1
MSMEG_0803	-	hypothetical protein MSMEG_0803	7	278.9	248.3	-0.17	3904.3	3476.76	-30.5	0.79	1
MSMEG_0804c	-	hypothetical protein MSMEG_0804	1	106.9	86.1	-0.31	213.8	172.3	-20.8	1	1
MSMEG_0805	-	hypothetical protein MSMEG_0805	11	71.7	52.5	-0.45	1576.9	1156.03	-19.1	0.52	1
MSMEG_0806	-	hydrolase	21	65.5	118.9	0.86	2751.6	4992.54	53.4	0.26	1
MSMEG_0807	-	leupeptin-inactivating enzyme 1	17	78.8	89.2	0.18	2680.4	3032.55	10.4	0.75	1
MSMEG_0808	-	chalcone synthase Pks10	11	103.7	36.6	-1.5	2282.2	805.09	-67.1	0.16	1
MSMEG_0809	-	isoprenylcysteine carboxyl methyltransferase	6	80.8	44.6	-0.86	969.7	535.52	-36.2	0.32	1
MSMEG_0810c	-	putative pyrimidine permease RutG	11	72	45.6	-0.66	1583.5	1003.39	-26.4	0.4	1
MSMEG_0811	-	oxidoreductase	10	88.3	270.9	1.62	1766.2	5417.99	182.6	0.43	1
MSMEG_0812c	-	amino acid transporter	13	297.6	286	-0.06	7737.3	7435.12	-11.6	0.91	1
MSMEG_0813c	-	hypothetical protein MSMEG_0813	6	71.7	10.9	-2.72	860.2	130.39	-60.8	0.027	1
MSMEG_0814c	-	membrane protein	4	97.3	47.4	-1.04	778.4	379.39	-49.9	0.4	1
MSMEG_0815	-	transcriptional regulator, TetR family protein	21	88.6	84	-0.08	3722.2	3527.21	-4.6	0.86	1
MSMEG_0816c	-	flavin-binding monooxygenase	22	97.5	74.3	-0.39	4288	3270.56	-23.1	0.35	1
MSMEG_0817	-	LysR-family protein transcriptional regulator	10	222.6	274.5	0.3	4451.4	5490.29	51.9	0.75	1
MSMEG_0818	-	transporter, major facilitator family protein	15	115.8	74.8	-0.63	3475.1	2244.92	-41	0.21	1
MSMEG_0819	-	N-carbamoyl-L-amino acid amidohydrolase	10	31.4	51.2	0.71	627.6	1024.35	19.8	0.67	1
MSMEG_0820c	-	hypothetical protein MSMEG_0820	1	17.1	37.3	1.12	34.2	74.51	20.2	1	1
MSMEG_0821	-	glutamyl-tRNA(Gln) amidotransferase subunit A	12	96.2	42.4	-1.18	2309.5	1018.01	-53.8	0.2	1
MSMEG_0822c	-	cytochrome P450	10	129.7	178.9	0.46	2593.7	3578.71	49.3	0.62	1
MSMEG_0823c	-	hypothetical protein MSMEG_0823	9	156.7	118.5	-0.4	2821.4	2132.39	-38.3	0.52	1
MSMEG_0824c	-	hypothetical protein MSMEG_0824	7	60.2	90.3	0.59	842.6	1264.82	30.2	0.54	1
MSMEG_0825c	thiD	phosphomethylpyrimidine kinase	6	41.9	37.8	-0.15	502.8	453.9	-4.1	0.82	1
MSMEG_0826c	thiC	thiamine biosynthesis protein ThiC	15	150.2	68.2	-1.14	4507	2045.59	-82	0.24	1
MSMEG_0827	-	major facilitator superfamily protein MFS_1	16	159.4	219.2	0.46	5101.1	7012.91	59.7	0.62	1
MSMEG_0828c	-	immunogenic protein MPT63	5	108.8	148.2	0.45	1087.7	1482.39	39.5	0.66	1
MSMEG_0829c	xth	exodeoxyribonuclease III	10	226	206.5	-0.13	4520.2	4129.99	-19.5	0.83	1
MSMEG_0830c	-	acetyltransferase, gnat family protein	8	133.9	71.1	-0.91	2142.2	1137.14	-62.8	0.1	1
MSMEG_0831	-	short chain dehydrogenase	6	227.8	285.1	0.32	2733.4	3421.02	57.3	0.66	1
MSMEG_0832c	def	peptide deformylase	6	0	0	0	0	0	0	1	1
MSMEG_0833	-	hypothetical protein MSMEG_0833	4	0	0	0	0	0	0	1	1
MSMEG_0834	-	tuberculin related peptide	1	0	0	0	0	0	0	1	1
MSMEG_0835	sodC	copper/zinc superoxide dismutase	1	0	7	3	0	13.97	7	1	1
MSMEG_0836	-	carboxylate-amine ligase	8	252.6	209.5	-0.27	4041.6	3351.42	-43.1	0.83	1
MSMEG_0837	-	hypothetical protein MSMEG_0837	2	52.1	99	0.93	208.4	395.82	46.8	1	1
MSMEG_0838c	-	AsnC-family protein transcriptional regulator	15	85.9	208.7	1.28	2576.5	6260.6	122.8	0.31	1
MSMEG_0839	-	ATP-dependent protease La	5	41.2	66.9	0.7	411.5	668.76	25.7	0.6	1
MSMEG_0840c	-	hypothetical protein MSMEG_0840	9	3.9	3.6	-0.12	70.8	65.19	-0.3	0.87	1
MSMEG_0842c	-	hypothetical protein MSMEG_0842	6	72.3	96.7	0.42	867.6	1160.69	24.4	0.59	1
MSMEG_0843c	-	putative monovalent cation/H+ antiporter subunit G	1	0	0	0	0	0	0	1	1
MSMEG_0844c	-	putative monovalent cation/H+ antiporter subunit F	3	213.1	212.7	0	1278.4	1275.93	-0.4	1	1
MSMEG_0845c	-	putative monovalent cation/H+ antiporter subunit E	3	514.5	510.3	-0.01	3086.9	3062.06	-4.1	0.97	1
MSMEG_0846c	-	putative monovalent cation/H+ antiporter subunit D	16	575.5	889.1	0.63	18415.8	28452.5	313.6	0.16	1
MSMEG_0847c	-	putative monovalent cation/H+ antiporter subunit C	6	340.8	234.6	-0.54	4090	2815.37	-106.2	0.53	1
MSMEG_0848c	-	putative monovalent cation/H+ antiporter subunit A	26	429.6	263.5	-0.71	22340.6	13700.6	-166.2	0.055	1
MSMEG_0849	-	oxygenase	2	0	14	3.9	0	55.88	14	1	1
MSMEG_0850	-	hypothetical protein MSMEG_0850	8	253.6	227.9	-0.15	4057.4	3646.72	-25.7	0.84	1
MSMEG_0851c	-	citrate transporter	10	137	340.3	1.31	2739.8	6805.57	203.3	0.55	1
MSMEG_0852c	-	CBS domain-containing protein	2	489.6	147.9	-1.73	1958.4	591.4	-341.8	0.37	1
MSMEG_0853c	-	hypothetical protein MSMEG_0853	3	146.5	95.1	-0.62	879.1	570.32	-51.5	0.51	1
MSMEG_0854	-	two-component system sensor kinase	4	151.7	83.2	-0.87	1213.2	665.91	-68.4	0.49	1
MSMEG_0855c	-	hypothetical protein MSMEG_0855	5	114.9	46.6	-1.3	1148.8	465.67	-68.3	0.073	1
MSMEG_0856	-	DNA-binding response regulator, LuxR family protein	8	265.8	264.5	-0.01	4252.3	4232.19	-1.3	1	1
MSMEG_0857c	-	hypothetical protein MSMEG_0857	3	152.9	95.6	-0.68	917.6	573.68	-57.3	0.65	1
MSMEG_0858c	-	cell division control protein Cdc48	8	68.7	98	0.51	1099.4	1568.41	29.3	0.72	1
MSMEG_0859	-	transcriptional regulator, TetR family protein	5	311	293.1	-0.09	3110.1	2930.62	-17.9	0.87	1
MSMEG_0860c	-	CDP-diacylglycerol--serine O-phosphatidyltransferase	7	59.3	81.6	0.46	830.5	1142.45	22.3	0.85	1
MSMEG_0861c	psd	phosphatidylserine decarboxylase	4	44.7	384.2	3.1	357.6	3073.33	339.5	0.17	1
MSMEG_0862c	-	molybdopterin biosynthesis protein MoeA	8	65.1	43.9	-0.57	1041.2	703.16	-21.1	0.62	1
MSMEG_0863c	-	short chain dehydrogenase	10	66.6	71.4	0.1	1332.7	1427.28	4.7	0.87	1
MSMEG_0864	-	membrane flanked domain-containing protein	4	61.1	98.6	0.69	488.6	788.67	37.5	0.58	1
MSMEG_0865	-	membrane flanked domain-containing protein	10	151.9	187.7	0.31	3038.1	3754.49	35.8	0.95	1
MSMEG_0866c	-	DNA or RNA helicase of superfamily protein II	17	15.4	10.9	-0.5	524.7	372.02	-4.5	0.45	1
MSMEG_0867	-	hydrolase	8	201.5	267.4	0.41	3223.7	4277.98	65.9	0.8	1
MSMEG_0868c	-	hypothetical protein MSMEG_0868	20	156.5	199.3	0.35	6258.9	7973.75	42.9	0.79	1
MSMEG_0869	-	hypothetical protein MSMEG_0869	3	0.7	6.2	3.12	4.3	37.25	5.5	1	1
MSMEG_0870c	-	oxidoreductase	24	74.3	61.7	-0.27	3564.9	2961.42	-12.6	0.57	1
MSMEG_0871c	-	putative aldehyde or xanthine dehydrogenase, molybdopterin binding subunit protein	11	23.2	29.5	0.34	510.9	648.45	6.3	0.59	1
MSMEG_0872c	-	twin-arginine translocation pathway signal	3	0	17.1	4.18	0	102.45	17.1	0.13	1
MSMEG_0873c	-	hypothetical protein MSMEG_0873	2	9.1	0	-3.34	36.4	0	-9.1	1	1
MSMEG_0874	-	transcriptional regulator, GntR family protein	3	172.2	155.9	-0.14	1033.1	935.22	-16.3	0.91	1
MSMEG_0875	-	putative sialic acid transporter	19	204.5	354	0.79	7771.4	13451.5	149.5	0.19	1
MSMEG_0876c	-	short chain dehydrogenase	6	206.3	80.1	-1.36	2475.4	961.48	-126.2	0.27	1
MSMEG_0877	-	dihydrodipicolinate synthase	8	35.8	171.7	2.26	572.5	2747.86	136	0.016	1
MSMEG_0878	-	transcriptional regulator	7	209.6	133.2	-0.65	2934.7	1865.27	-76.4	0.29	1
MSMEG_0879c	-	hypothetical protein MSMEG_0879	1	0	0	0	0	0	0	1	1
MSMEG_0880	groEL	chaperonin GroEL	11	0	1.4	1.24	0	30.14	1.4	1	1
MSMEG_0881	-	hypothetical protein MSMEG_0881	4	359.7	200.4	-0.84	2877.9	1602.81	-159.4	0.34	1
MSMEG_0882c	-	hypothetical protein MSMEG_0882	3	245.1	104	-1.24	1470.3	623.74	-141.1	0.22	1
MSMEG_0883c	-	amidohydrolase family protein	18	108.1	92.1	-0.23	3891	3315.32	-16	0.76	1
MSMEG_0884	-	glyoxalase family protein	6	147.9	95.7	-0.63	1775.1	1148.66	-52.2	0.57	1
MSMEG_0885c	-	hypothetical protein MSMEG_0885	4	142.6	25.6	-2.48	1141	204.89	-117	0.066	1
MSMEG_0886c	-	serine/threonine-protein kinase PknD	10	109.2	356.6	1.71	2183.2	7132.07	247.4	0.4	1
MSMEG_0887	-	hypothetical protein MSMEG_0887	6	137.2	112.3	-0.29	1645.9	1347.98	-24.8	0.77	1
MSMEG_0888	-	hypothetical protein MSMEG_0888	6	126.3	65.9	-0.94	1515.9	791.12	-60.4	0.29	1
MSMEG_0889	-	succinic semialdehyde dehydrogenase	17	270.1	209.5	-0.37	9183	7124	-60.6	0.5	1
MSMEG_0890	-	HD domain-containing protein	7	174.5	124.3	-0.49	2443.6	1740.06	-50.3	0.39	1
MSMEG_0891	-	polyphosphate kinase 2	13	125.9	134.3	0.09	3273.7	3491.5	8.4	0.88	1
MSMEG_0892	-	hypothetical protein MSMEG_0892	8	86.4	88.3	0.03	1382.6	1413.19	1.9	1	1
MSMEG_0893c	-	hypothetical protein MSMEG_0893	8	227	196.8	-0.21	3632.4	3148.33	-30.3	0.79	1
MSMEG_0894	-	dihydrodipicolinate reductase	23	118.1	148.5	0.33	5431.7	6832.72	30.5	0.62	1
MSMEG_0895	-	GntR family transcriptional regulator	7	167.2	201.8	0.27	2341	2825.08	34.6	0.78	1
MSMEG_0896	-	integral membrane transport protein	18	288.3	264.6	-0.12	10377.7	9525.85	-23.7	0.89	1
MSMEG_0897	-	hypothetical protein MSMEG_0897	13	119	157	0.4	3092.9	4081.24	38	0.65	1
MSMEG_0898	-	tagatose-1,6-bisphosphate aldolase GatY	5	32.3	33.3	0.04	323.1	332.82	1	0.94	1
MSMEG_0899c	-	prolyl oligopeptidase family protein	36	78.2	69.9	-0.16	5627.2	5029.78	-8.3	0.75	1
MSMEG_0900	-	eptc-inducible aldehyde dehydrogenase	17	359.4	644.4	0.84	12218.5	21909.1	285	0.22	1
MSMEG_0901	-	hypothetical protein MSMEG_0901	3	91.1	17.9	-2.35	546.7	107.1	-73.3	0.077	1
MSMEG_0902c	-	cyclopropane-fatty-acyl-phospholipid synthase 1	8	411.1	320.8	-0.36	6577.5	5132.36	-90.3	0.41	1
MSMEG_0903	lpdA	dihydrolipoamide dehydrogenase	18	0.1	1.7	3.9	4	60.28	1.6	0.55	1
MSMEG_0904	-	hypothetical protein MSMEG_0904	4	79.8	75.5	-0.08	638.4	604.08	-4.3	0.89	1
MSMEG_0905c	pcaC	hypothetical protein MSMEG_0905	4	64.6	87.3	0.43	517	698.5	22.7	0.76	1
MSMEG_0906c	-	DNA-binding protein	21	181.8	241.2	0.41	7634	10131	59.5	0.7	1
MSMEG_0907	-	hypothetical protein MSMEG_0907	0	0	0	0	0	0	0	1	1
MSMEG_0908	-	hypothetical protein MSMEG_0908	5	310	396.2	0.35	3100.5	3962.36	86.2	0.74	1
MSMEG_0909	-	acyl-ACP thioesterase superfamily protein	9	297.5	221.9	-0.42	5355.2	3994.43	-75.6	0.45	1
MSMEG_0910c	-	hypothetical protein MSMEG_0910	5	10.7	5.6	-0.93	106.8	55.88	-5.1	0.48	1
MSMEG_0911	aceA	isocitrate lyase	14	264.6	224.3	-0.24	7407.8	6279.06	-40.3	0.62	1
MSMEG_0912	-	3-hydroxybutyryl-CoA dehydrogenase	8	563.5	363	-0.63	9015.4	5808.6	-200.4	0.22	1
MSMEG_0913	-	methoxy mycolic acid synthase 1	16	223.6	252.4	0.18	7154.4	8077.5	28.8	0.89	1
MSMEG_0914c	-	hypothetical protein MSMEG_0914	15	64.6	73.5	0.19	1936.8	2205.35	9	0.85	1
MSMEG_0915c	-	polyphosphate kinase 2 superfamily protein	11	226.1	144.2	-0.65	4974.1	3171.35	-81.9	0.23	1
MSMEG_0916c	-	transcriptional regulator, TetR family protein	7	172.6	141.7	-0.28	2416.2	1984.28	-30.9	0.59	1
MSMEG_0917	-	hypothetical protein MSMEG_0917	6	118.2	386.6	1.71	1418.9	4638.76	268.3	0.56	1
MSMEG_0918	-	transcriptional regulator, XRE family protein	5	442.4	564.1	0.35	4423.6	5640.85	121.7	0.61	1
MSMEG_0919	-	heparin-binding hemagglutinin	3	339.5	875.5	1.37	2036.9	5253.07	536	0.7	1
MSMEG_0920	-	hypothetical protein MSMEG_0920	7	152.2	233.8	0.62	2130.9	3273.55	81.6	0.65	1
MSMEG_0921	-	hypothetical protein MSMEG_0921	2	193.8	355	0.87	775.3	1420.05	161.2	0.86	1
MSMEG_0922	deoC	deoxyribose-phosphate aldolase	3	15	39.2	1.39	89.7	235.03	24.2	0.33	1
MSMEG_0923c	-	hypothetical protein MSMEG_0923	5	0.4	0	-0.49	4	0	-0.4	1	1
MSMEG_0924c	-	hydrolase, carbon-nitrogen family protein	7	214.8	134.5	-0.67	3006.8	1883.64	-80.2	0.43	1
MSMEG_0925c	-	hypothetical protein MSMEG_0925	3	96.3	150.1	0.64	577.5	900.82	53.9	0.78	1
MSMEG_0926c	-	hypothetical protein MSMEG_0926	4	347.4	295.9	-0.23	2778.9	2367.42	-51.4	0.89	1
MSMEG_0927c	-	hypothetical protein MSMEG_0927	5	64	42.4	-0.59	639.5	423.76	-21.6	0.63	1
MSMEG_0928	murB	UDP-N-acetylenolpyruvoylglucosamine reductase	7	0	0	0	0	0	0	1	1
MSMEG_0929	-	ErfK/YbiS/YcfS/YnhG family protein	18	330.3	367.3	0.15	11889.7	13221.6	37	0.81	1
MSMEG_0930c	-	serine 3-dehydrogenase	4	366.8	190.9	-0.94	2934.8	1527.53	-175.9	0.17	1
MSMEG_0931c	-	hypothetical protein MSMEG_0931	0	0	0	0	0	0	0	1	1
MSMEG_0932	-	ROK family protein	10	170.7	138.3	-0.3	3414	2766.35	-32.4	0.48	1
MSMEG_0933	-	hypothetical protein MSMEG_0933	12	161.2	257.7	0.68	3869.5	6183.76	96.4	0.51	1
MSMEG_0934	-	hypothetical protein MSMEG_0934	6	131.8	415.3	1.66	1581.3	4983.62	283.5	0.22	1
MSMEG_0935	-	2,3-bisphosphoglycerate-dependent phosphoglycerate mutase	11	106.2	42.3	-1.33	2336.5	930.57	-63.9	0.016	1
MSMEG_0936	senX3	sensor histidine kinase SenX3	6	5	120.3	4.59	59.8	1443.07	115.3	0.04	1
MSMEG_0937	regX3	DNA-binding response regulator RegX3	7	0.3	0	-0.37	4	0	-0.3	1	1
MSMEG_0938c	-	hypothetical protein MSMEG_0938	10	135.4	61.2	-1.14	2707.4	1224.71	-74.1	0.2	1
MSMEG_0939	-	Ppx/GppA phosphatase family protein	7	165.7	180.1	0.12	2320.3	2521.36	14.4	0.99	1
MSMEG_0940	-	hypothetical protein MSMEG_0940	8	54.2	33.9	-0.68	867.3	542.12	-20.3	0.6	1
MSMEG_0941	-	AP endonuclease, family protein 2	8	216.3	357.6	0.73	3460.8	5721.32	141.3	0.46	1
MSMEG_0942	-	hypothetical protein MSMEG_0942	3	568.3	753	0.41	3409.6	4518.19	184.8	0.66	1
MSMEG_0943	proC	pyrroline-5-carboxylate reductase	9	72.8	347.1	2.25	1311	6248.33	274.3	0.55	1
MSMEG_0944	-	DNA binding domain-containing protein	2	170.1	107.6	-0.66	680.5	430.36	-62.5	0.56	1
MSMEG_0945	-	hypothetical protein MSMEG_0945	3	467.5	337.7	-0.47	2804.8	2025.93	-129.8	0.54	1
MSMEG_0946	-	NAD dependent epimerase/dehydratase family protein	14	203.1	168.2	-0.27	5686.4	4710.79	-34.8	0.52	1
MSMEG_0947	-	acyltransferase	9	138.8	71.4	-0.96	2498	1284.99	-67.4	0.19	1
MSMEG_0948c	-	hypothetical protein MSMEG_0948	4	0	0	0	0	0	0	1	1
MSMEG_0949c	-	HAD-superfamily protein subfamily protein IB hydrolase	8	163.2	148.9	-0.13	2611.8	2382.17	-14.3	0.76	1
MSMEG_0950c	-	hypothetical protein MSMEG_0950	4	122	100.7	-0.28	976.1	805.74	-21.3	0.73	1
MSMEG_0951	-	glutaredoxin 2	2	132.6	73.8	-0.84	530.3	295.31	-58.7	0.21	1
MSMEG_0952	hemA	glutamyl-tRNA reductase	13	0.2	3.5	4.48	4	90.42	3.3	0.2	1
MSMEG_0953	hemC	porphobilinogen deaminase	11	0	0	0	0	0	0	1	1
MSMEG_0954	hemD	uroporphyrinogen-III synthase	5	0	0	0	0	0	0	1	1
MSMEG_0955c	-	hypothetical protein MSMEG_0955	5	80.5	59.3	-0.44	805.3	593.34	-21.2	0.63	1
MSMEG_0956	hemB	delta-aminolevulinic acid dehydratase	12	0	0	0	0	0	0	1	1
MSMEG_0957	-	hypothetical protein MSMEG_0957	4	68.3	66.6	-0.04	546.3	532.8	-1.7	0.99	1
MSMEG_0958	-	hypothetical protein MSMEG_0958	1	155.7	27.9	-2.48	311.5	55.88	-127.8	0.27	1
MSMEG_0959	-	putative transmembrane protein	6	191.1	248.5	0.38	2293.6	2982.38	57.4	0.72	1
MSMEG_0960	-	putative transmembrane protein	2	205.5	238	0.21	822.1	952.17	32.5	0.82	1
MSMEG_0962	-	TetR-family protein transcriptional regulator	6	171.9	152.3	-0.17	2062.4	1827.24	-19.6	0.86	1
MSMEG_0963	-	hypothetical protein MSMEG_0963	2	363.8	210.9	-0.79	1455	843.77	-152.8	0.39	1
MSMEG_0964	-	pyridoxamine 5'-phosphate oxidase family protein	5	471.2	753.4	0.68	4712.4	7534.21	282.2	0.61	1
MSMEG_0965	-	porin	5	395.1	744.1	0.91	3950.6	7441.08	349	0.24	1
MSMEG_0966c	-	hypothetical protein MSMEG_0966	4	59.6	325.4	2.45	476.7	2603.5	265.9	0.16	1
MSMEG_0967c	-	hypothetical protein MSMEG_0967	2	520.4	254.2	-1.03	2081.4	1016.72	-266.2	0.22	1
MSMEG_0968	-	cytochrome P450	5	383.3	404.2	0.08	3833.2	4042.04	20.9	0.95	1
MSMEG_0969	hemL	glutamate-1-semialdehyde aminotransferase	10	0	0	0	0	0	0	1	1
MSMEG_0970	-	phosphoglycerate mutase family protein	5	0.4	0	-0.49	4	0	-0.4	1	1
MSMEG_0971	-	hypothetical protein MSMEG_0971	3	0.7	0	-0.74	4	0	-0.7	1	1
MSMEG_0972	-	cytochrome C biogenesis protein transmembrane region	5	2	0	-1.6	20.2	0	-2	0.13	1
MSMEG_0973	-	hypothetical protein MSMEG_0973	15	0.1	0.6	2.2	4	18.63	0.5	0.13	1
MSMEG_0974	ccsB	cytochrome c-type biogenesis protein CcsB	15	0.4	2	2.31	12.1	60.28	1.6	0.5	1
MSMEG_0975	-	hypothetical protein MSMEG_0975	9	253.9	190.7	-0.41	4570.6	3432.12	-63.2	0.47	1
MSMEG_0976c	-	hypothetical protein MSMEG_0976	3	396.7	351.6	-0.17	2380.2	2109.36	-45.1	0.8	1
MSMEG_0977	-	hypothetical protein MSMEG_0977	3	2	5.8	1.52	12.1	34.8	3.8	0.68	1
MSMEG_0978	-	aminotransferase, class V superfamily protein	7	158.3	99.8	-0.67	2216.1	1397.01	-58.5	0.37	1
MSMEG_0979	-	keratin associated protein	4	38.2	19.8	-0.95	305.8	158.33	-18.4	0.29	1
MSMEG_0980c	-	signal transduction histidine kinase	13	120.2	104	-0.21	3124	2702.84	-16.2	0.76	1
MSMEG_0981	-	two-component system regulator	3	84.6	135.8	0.68	507.7	815.06	51.2	0.61	1
MSMEG_0982	-	immunogenic protein	9	208.9	380.3	0.86	3759.9	6844.63	171.4	0.27	1
MSMEG_0983c	-	two-component system response regulator	3	189.2	45.8	-2.05	1135.4	274.75	-143.4	0.13	1
MSMEG_0984	-	trap transporter, 4tm/12tm fusion protein	27	64.6	70.6	0.13	3486.7	3814.36	6.1	0.79	1
MSMEG_0985c	-	sugar transporter family protein	25	475.5	589	0.31	23775.4	29450.9	113.5	0.36	1
MSMEG_0986c	-	RemM protein	5	37.5	13.5	-1.47	374.7	135.04	-24	0.125	1
MSMEG_0987	-	hypothetical protein MSMEG_0987	6	299.9	184.7	-0.7	3598.9	2215.95	-115.2	0.45	1
MSMEG_0988c	menA	1,4-dihydroxy-2-naphthoate octaprenyltransferase	8	0.8	0	-0.81	12.1	0	-0.8	0.22	1
MSMEG_0989	-	hypothetical protein MSMEG_0989	0	0	0	0	0	0	0	1	1
MSMEG_0990	mtaP	5'-methylthioadenosine phosphorylase	7	117.2	29.3	-2	1640.6	409.79	-87.9	0.22	1
MSMEG_0991	-	NAD-dependent epimerase/dehydratase	9	64.6	45.6	-0.5	1162	821.52	-18.9	0.45	1
MSMEG_0992	-	2-nitropropane dioxygenase, NPD	8	85	106.4	0.33	1359.5	1703.2	21.5	0.6	1
MSMEG_0993c	-	histidine kinase	3	0	3.9	2.29	0	23.28	3.9	1	1
MSMEG_0994c	resD	DNA-binding response regulator ResD	6	63.6	29.1	-1.13	763.5	349.25	-34.5	0.18	1
MSMEG_0995	-	glycosyl transferase, family protein 2	7	32.6	46.7	0.52	456.6	653.36	14.1	0.66	1
MSMEG_0996	-	hypothetical protein MSMEG_0996	0	0	0	0	0	0	0	1	1
MSMEG_0997	-	hypothetical protein MSMEG_0997	2	72.7	47.7	-0.61	290.8	190.92	-25	0.44	1
MSMEG_0998	-	oxidoreductase, molybdopterin binding	10	47.9	14.2	-1.75	958.4	284.06	-33.7	0.15	1
MSMEG_0999c	-	integral membrane protein	10	58	78.6	0.44	1160.2	1571.64	20.6	0.48	1
MSMEG_1000	-	hypothetical protein MSMEG_1000	6	224.1	286.3	0.35	2689.3	3435.24	62.2	0.58	1
MSMEG_1001	-	acetyltransferase, gnat family protein, putative	6	84.1	116.6	0.47	1009	1398.83	32.5	0.71	1
MSMEG_1002	-	IS1096, tnpR protein	10	435.8	322.2	-0.44	8715.2	6444.77	-113.5	0.25	1
MSMEG_1003c	-	IS1096, tnpA protein	9	618.6	508.8	-0.28	11135.5	9158.75	-109.8	0.55	1
MSMEG_1005	-	methyltransferase type 11	7	113.8	200.8	0.82	1593.3	2810.6	86.9	0.31	1
MSMEG_1006	-	aminoglycoside phosphotransferase	10	178.9	263.4	0.56	3578.1	5267.42	84.5	0.57	1
MSMEG_1007c	-	transport protein	7	142	162.9	0.2	1988.5	2280.25	20.8	0.88	1
MSMEG_1008	-	hypothetical protein MSMEG_1008	2	60.5	49.4	-0.29	241.9	197.78	-11	0.79	1
MSMEG_1009c	-	cytochrome p450	18	296.6	351.4	0.24	10679.1	12650.3	54.8	0.74	1
MSMEG_1010	-	transcriptional regulator, TetR family protein	5	306.1	253.4	-0.27	3061.2	2533.64	-52.8	0.68	1
MSMEG_1011	-	short chain dehydrogenase	7	99.2	52	-0.93	1389.2	728.13	-47.2	0.13	1
MSMEG_1012c	-	alkaline phosphatase	15	206.4	191.7	-0.11	6193.4	5750.27	-14.8	0.84	1
MSMEG_1013c	-	hypothetical protein MSMEG_1013	8	73.1	96.8	0.41	1169.4	1548.75	23.7	0.7	1
MSMEG_1014c	dinB	DNA polymerase IV	5	281.7	327.1	0.22	2816.8	3271.09	45.4	0.75	1
MSMEG_1015c	-	transcriptional regulator, TetR family protein	4	317.6	407.5	0.36	2540.7	3259.72	89.9	0.59	1
MSMEG_1016	-	secreted protein	5	150.9	192.3	0.35	1508.9	1922.58	41.4	0.57	1
MSMEG_1017	-	glutaredoxin	5	407	614.9	0.6	4070.3	6148.7	207.8	0.45	1
MSMEG_1019	-	ribonucleotide-diphosphate reductase subunit alpha	45	409.5	416.7	0.03	36856.9	37502.3	7.2	0.94	1
MSMEG_1021c	-	glyoxalase/bleomycin resistance protein/dioxygenase	5	128.9	205.9	0.68	1289.3	2058.93	77	0.74	1
MSMEG_1022c	-	hypothetical protein MSMEG_1022	0	0	0	0	0	0	0	1	1
MSMEG_1023	-	integral membrane transporter	17	132.8	209.5	0.66	4514	7122.62	76.7	0.45	1
MSMEG_1024	-	hypothetical protein MSMEG_1024	5	156.1	96.2	-0.7	1561.4	962.39	-59.9	0.54	1
MSMEG_1025c	-	TetR-family protein transcriptional regulator	8	158.2	161.7	0.03	2531.2	2586.94	3.5	0.96	1
MSMEG_1026	-	putative acetyltransferase	11	101.5	154.5	0.61	2233.1	3399.93	53	0.35	1
MSMEG_1027	-	hypothetical protein MSMEG_1027	9	133.1	128.3	-0.05	2395.5	2309.22	-4.8	0.98	1
MSMEG_1028c	-	geranylgeranyl reductase	17	281.6	318.2	0.18	9574.3	10818.4	36.6	0.91	1
MSMEG_1029	-	transcriptional regulatory protein	5	361.9	504.6	0.48	3619	5046.48	142.7	0.45	1
MSMEG_1030	-	monooxygenase	20	329.4	281.8	-0.23	13176.1	11270.4	-47.6	0.45	1
MSMEG_1031	-	hypothetical protein MSMEG_1031	6	315.8	621.6	0.98	3789.9	7459.19	305.8	0.54	1
MSMEG_1032	-	hypothetical protein MSMEG_1032	2	270.8	291.8	0.11	1083.2	1167.03	20.9	0.93	1
MSMEG_1033	nrdF2	ribonucleotide-diphosphate reductase subunit beta	18	390.3	379	-0.04	14050.4	13645.2	-11.3	0.93	1
MSMEG_1034	-	putative esterase family protein	13	160.4	207.6	0.37	4171.3	5396.5	47.1	0.45	1
MSMEG_1035	-	hypothetical protein MSMEG_1035	22	87.6	74.1	-0.24	3855.4	3261.39	-13.5	0.54	1
MSMEG_1037c	-	alcohol dehydrogenase, zinc-containing	16	272.2	356.7	0.39	8709.9	11415	84.5	0.3	1
MSMEG_1038c	-	GTP cyclohydrolase II	3	272.3	57.4	-2.25	1633.6	344.6	-214.8	0.16	1
MSMEG_1039c	-	periplasmic binding protein	5	161.3	249.2	0.63	1613.3	2491.74	87.8	0.48	1
MSMEG_1041	serB	phosphoserine phosphatase	11	167.5	82.3	-1.02	3684.4	1811.45	-85.1	0.11	1
MSMEG_1042	-	hypothetical protein MSMEG_1042	1	73	209	1.52	145.9	418.07	136.1	0.34	1
MSMEG_1043c	-	GntR-family protein transcriptional regulator	12	116.9	111.2	-0.07	2805.9	2668.3	-5.7	0.94	1
MSMEG_1044	-	hypothetical protein MSMEG_1044	3	63	47.3	-0.41	378	284.06	-15.7	0.79	1
MSMEG_1045	-	integral membrane protein	9	303.4	208	-0.54	5460.5	3744.39	-95.3	0.35	1
MSMEG_1046	-	ABC-type molybdenum transport system, ATPase component	7	154.5	290.6	0.91	2163.1	4068.43	136.1	0.5	1
MSMEG_1047	-	nudix hydrolase	6	265.5	271.1	0.03	3186	3253.24	5.6	0.95	1
MSMEG_1048	-	enoyl-CoA hydratase	5	104.2	118.9	0.19	1042.4	1188.63	14.6	0.78	1
MSMEG_1049	-	methyltransferase, UbiE/COQ5 family protein	9	206.9	97.9	-1.08	3724.6	1762.31	-109	0.21	1
MSMEG_1050	-	SAM-dependent methyltransferase	12	107.2	136	0.34	2572.2	3263.33	28.8	0.53	1
MSMEG_1051	-	immunogenic protein MPB64/MPT64	11	255.6	185.7	-0.46	5623.1	4086.14	-69.9	0.25	1
MSMEG_1052c	-	amino acid carrier protein	23	480.3	440.7	-0.12	22095.2	20274.5	-39.6	0.71	1
MSMEG_1053c	-	hypothetical protein MSMEG_1053	13	274.1	236.2	-0.21	7125.4	6140.78	-37.9	0.64	1
MSMEG_1054	-	hypothetical protein MSMEG_1054	1	18.2	4.7	-1.97	36.4	9.31	-13.6	1	1
MSMEG_1055	-	hexapeptide transferase family protein	5	347.2	367.1	0.08	3471.6	3671.31	20	0.91	1
MSMEG_1057	fni	isopentenyl pyrophosphate isomerase	7	59.6	99.1	0.73	834.1	1387.45	39.5	0.95	1
MSMEG_1058	-	IS1096, tnpR protein	9	412.7	305.1	-0.44	7429.1	5491.56	-107.6	0.28	1
MSMEG_1059c	-	IS1096, tnpA protein	9	594.5	512.8	-0.21	10701.8	9230.02	-81.8	0.7	1
MSMEG_1060c	-	putative Lsr2 protein	4	219.2	130	-0.75	1753.5	1039.61	-89.2	0.26	1
MSMEG_1061c	-	phosphohydrolase	8	219.7	266	0.28	3514.6	4255.35	46.3	0.7	1
MSMEG_1062c	-	O-succinylbenzoic acid--CoA ligase	8	0.3	1.2	2.2	4	18.63	0.9	0.24	1
MSMEG_1063c	-	hypothetical protein MSMEG_1063	2	49.6	19.8	-1.33	198.4	79.16	-29.8	0.52	1
MSMEG_1064	-	phosphate/sulphate permease	5	397.3	653.6	0.72	3972.7	6536.25	256.4	0.56	1
MSMEG_1065	-	hypothetical protein MSMEG_1065	2	138.1	145.5	0.08	552.3	582.09	7.5	1	1
MSMEG_1066	-	hypothetical protein MSMEG_1066	3	51.9	49.7	-0.06	311.3	298.03	-2.2	0.93	1
MSMEG_1067c	-	hypothetical protein MSMEG_1067	5	143.7	78.2	-0.88	1436.9	782.32	-65.5	0.26	1
MSMEG_1068c	-	regulatory protein	4	207.6	113.5	-0.87	1660.8	908.06	-94.1	0.53	1
MSMEG_1069	-	amino acid permease-associated region	12	147.5	275	0.9	3540.3	6599.23	127.5	0.36	1
MSMEG_1070	-	3-oxoacyl-	7	40.7	22.3	-0.87	570	312	-18.4	0.3	1
MSMEG_1071	-	3-oxoacyl-	4	181.6	112.9	-0.69	1452.6	902.88	-68.7	0.44	1
MSMEG_1072	speB	agmatinase	12	113.5	259.1	1.19	2724.5	6217.91	145.6	0.63	1
MSMEG_1073c	-	short chain dehydrogenase	8	194.2	85.9	-1.18	3106.6	1374.38	-108.3	0.11	1
MSMEG_1074	-	polysaccharide deacetylase	8	59.8	18.6	-1.68	956.1	298.03	-41.1	0.064	1
MSMEG_1075c	menB	naphthoate synthase	9	6.2	93.3	3.92	111.1	1679.53	87.1	0.43	1
MSMEG_1076	-	hypothetical protein MSMEG_1076	1	21.4	0	-4.48	42.7	0	-21.4	1	1
MSMEG_1077c	-	hypothetical protein MSMEG_1077	4	95.8	107.4	0.16	766.6	859.17	11.6	0.94	1
MSMEG_1078c	-	hydrolase	7	63.8	58.6	-0.12	892.5	821	-5.1	0.91	1
MSMEG_1079	-	hypothetical protein MSMEG_1079	3	8.5	0	-3.25	51.3	0	-8.5	1	1
MSMEG_1080	-	large subunit of N,N-dimethylformamidase	38	108.6	149.9	0.46	8254.8	11389.6	41.2	0.42	1
MSMEG_1081	-	hypothetical protein MSMEG_1081	1	0	16.3	4.11	0	32.6	16.3	1	1
MSMEG_1082	-	putative response regulator	9	128.9	182.7	0.5	2319.5	3289.34	53.9	0.98	1
MSMEG_1083c	-	hypothetical protein MSMEG_1083	4	4.3	0	-2.4	34.2	0	-4.3	1	1
MSMEG_1084	-	peptide/opine/nickel uptake family protein ABC transporter, periplasmic substrate-binding protein, putative	23	65.5	44.6	-0.55	3013	2052.97	-20.9	0.13	1
MSMEG_1085	-	dipeptide transport system permease protein DppB	10	102.5	110.7	0.11	2049	2214.4	8.3	0.91	1
MSMEG_1086	-	ABC transporter permease protein	10	82.9	151.8	0.87	1658.4	3035.28	68.8	0.2	1
MSMEG_1088	gatA	glutamyl-tRNA(Gln)/aspartyl-tRNA(Asn) amidotransferase, A subunit	11	78.6	22.7	-1.79	1728.2	500.47	-55.8	0.02	1
MSMEG_1089	-	hypothetical protein MSMEG_1089	1	86.6	121.1	0.48	173.1	242.15	34.5	1	1
MSMEG_1090	-	amidase	19	38.1	47.1	0.3	1448.9	1788.96	8.9	0.79	1
MSMEG_1091	ureE	urease accessory protein UreE	3	76.1	43.8	-0.8	456.7	262.97	-32.3	0.47	1
MSMEG_1092	-	urease accessory protein UreF	4	0	204.9	7.69	0	1639.57	204.9	0.28	1
MSMEG_1093	-	bifunctional urease subunit gamma/beta	3	31	4.7	-2.74	186.2	27.94	-26.4	0.36	1
MSMEG_1094	ureC	urease subunit alpha	14	120	71.9	-0.74	3360.2	2013.77	-48.1	0.47	1
MSMEG_1095	ureG	urease accessory protein UreG	3	96.3	26.4	-1.87	578.1	158.33	-70	0.32	1
MSMEG_1096	-	urease accessory protein UreD, putative	6	172.4	463.6	1.43	2068.4	5563.25	291.2	0.21	1
MSMEG_1097	-	glycosyl transferase, group 2 family protein	6	92.1	25.6	-1.85	1104.7	307.34	-66.4	0.07	1
MSMEG_1098c	-	acyl-CoA synthetase	15	218	234	0.1	6541.5	7021.45	16	0.93	1
MSMEG_1099c	-	hypothetical protein MSMEG_1099	0	0	0	0	0	0	0	1	1
MSMEG_1100c	-	DGPFAETKE domain-containing protein	4	51.6	21	-1.3	413.2	167.64	-30.7	0.43	1
MSMEG_1101	-	hypothetical protein MSMEG_1101	14	90.2	98.9	0.13	2526.3	2768.17	8.6	0.83	1
MSMEG_1102	-	twin-arginine translocation pathway signal	14	106.4	122.2	0.2	2980.2	3420.76	15.7	0.93	1
MSMEG_1103	-	O-succinylbenzoate synthase	6	0	2.5	1.81	0	30.14	2.5	1	1
MSMEG_1104	-	hypothetical protein MSMEG_1104	1	0	0	0	0	0	0	1	1
MSMEG_1106	-	transcriptional regulator, AraC family protein	6	140.4	33.8	-2.06	1684.6	405.13	-106.6	0.079	1
MSMEG_1107	-	isonitrile hydratase, putative	5	18.4	136.9	2.89	184.2	1369.34	118.5	0.12	1
MSMEG_1108	-	hydrolase, alpha/beta fold family protein	9	155.8	38.9	-2	2804.4	700.7	-116.9	0.04	1
MSMEG_1109	-	2-succinyl-6-hydroxy-2,4-cyclohexadiene-1-carboxylic acid synthase/2-oxoglutarate decarboxylase	12	0.3	1.6	2.28	8.1	39.45	1.3	0.35	1
MSMEG_1110	-	transmembrane protein	5	158.1	98.3	-0.69	1581.4	982.7	-59.9	0.67	1
MSMEG_1111c	-	hypothetical protein MSMEG_1111	9	103.8	55.6	-0.9	1868.9	1000.93	-48.2	0.13	1
MSMEG_1112c	-	aconitate hydratase	16	67	85.3	0.35	2144.1	2731.17	18.3	0.76	1
MSMEG_1113	-	glycosyl transferase	8	12.6	28.4	1.17	202.1	453.9	15.7	0.32	1
MSMEG_1114c	-	short chain dehydrogenase	8	154.9	153.9	-0.01	2479	2461.98	-1.1	0.98	1
MSMEG_1115	ubiE	ubiquinone/menaquinone biosynthesis methyltransferase	7	0	4.3	2.41	0	60.28	4.3	0.53	1
MSMEG_1116c	-	gamma-glutamylisopropylamide synthetase	20	171	74.5	-1.2	6841.8	2979	-96.6	0.028	1
MSMEG_1117	-	transcriptional regulator	6	26.4	129.6	2.29	317	1555.35	103.2	0.15	1
MSMEG_1118	-	amino acid permease	25	50.2	56	0.16	2512.4	2799.2	5.7	0.75	1
MSMEG_1119	-	glutamine amidotransferase, class I	10	137.3	81.1	-0.76	2746	1621.96	-56.2	0.51	1
MSMEG_1120	-	nitrilase/cyanide hydratase and apolipoprotein N-acyltransferase	13	113.5	247.5	1.13	2950.2	6435.23	134	0.53	1
MSMEG_1121	-	hypothetical protein MSMEG_1121	1	0	67.5	6.1	0	135.04	67.5	1	1
MSMEG_1122c	-	hypothetical protein MSMEG_1122	1	0	0	0	0	0	0	1	1
MSMEG_1123	-	cobalamin synthesis protein	8	55.7	34.2	-0.71	891.4	546.77	-21.5	0.51	1
MSMEG_1124	-	putative ferredoxin FdxA	8	128.4	69.9	-0.88	2055	1117.61	-58.6	0.22	1
MSMEG_1125	-	regulatory protein, ArsR	5	61.2	38.9	-0.66	612.2	388.71	-22.3	0.48	1
MSMEG_1126	-	hypothetical protein MSMEG_1126	7	31.4	31.9	0.02	440	447.04	0.5	0.98	1
MSMEG_1127	-	transmembrane protein	5	54	29.3	-0.88	540	293.37	-24.7	0.61	1
MSMEG_1128c	-	hypothetical protein MSMEG_1128	2	33.1	27.3	-0.28	132.4	109.3	-5.8	1	1
MSMEG_1129	-	D-amino-acid dehydrogenase	12	116.4	41.2	-1.5	2794	989.42	-75.2	0.04	1
MSMEG_1130	-	hypothetical protein MSMEG_1130	10	194.5	227.2	0.22	3889.1	4544.46	32.8	0.84	1
MSMEG_1131	-	tryptophan-rich sensory protein	6	86.6	77.8	-0.15	1038.6	933.54	-8.8	0.95	1
MSMEG_1132c	-	FAD binding domain-containing protein	11	139.7	165.9	0.25	3073.8	3648.8	26.1	0.73	1
MSMEG_1133	-	bifunctional short chain isoprenyl diphosphate synthase	8	0.5	0	-0.59	8.1	0	-0.5	0.51	1
MSMEG_1134	-	heat shock protein HtpX	10	262.9	374.7	0.51	5257.2	7493.21	111.8	0.52	1
MSMEG_1135	-	hypothetical protein MSMEG_1135	4	136.8	69.2	-0.98	1094.2	553.63	-67.6	0.42	1
MSMEG_1136	-	hypothetical protein MSMEG_1136	6	113.1	74.1	-0.61	1357.1	889.31	-39	0.63	1
MSMEG_1137c	-	amino acid permease-associated region	25	228.6	295.3	0.37	11428.7	14765	66.7	0.67	1
MSMEG_1138c	-	alcohol dehydrogenase 1	10	93.9	433.5	2.21	1877.4	8669.44	339.6	0.63	1
MSMEG_1139	-	transcription regulator	6	141.7	52.8	-1.42	1700.4	633.31	-88.9	0.11	1
MSMEG_1140c	-	NAD(P)H-dependent glycerol-3-phosphate dehydrogenase	11	99.9	63.8	-0.65	2198.1	1404.52	-36.1	0.42	1
MSMEG_1141	-	ABC-transporter integral membrane protein	4	314.2	322.7	0.04	2513.5	2581.64	8.5	0.99	1
MSMEG_1142	-	ABC-transporter integral membrane protein	14	146.1	58.4	-1.32	4090.5	1633.86	-87.7	0.24	1
MSMEG_1143	-	mce related protein	11	58.8	28	-1.07	1294.1	616.63	-30.8	0.16	1
MSMEG_1144	-	virulence factor Mce family protein	10	85.7	213.5	1.32	1713.2	4269.07	127.8	0.46	1
MSMEG_1145	-	virulence factor Mce family protein	8	54.5	158.2	1.54	872.2	2531.59	103.7	0.84	1
MSMEG_1146	-	virulence factor Mce family protein	9	21.9	14.6	-0.59	395.1	262.46	-7.4	0.54	1
MSMEG_1147	-	mce related protein	6	72.5	35.2	-1.04	870.6	422.47	-37.3	0.55	1
MSMEG_1148	-	mce related protein	16	46.5	50.2	0.11	1486.9	1607.21	3.8	0.96	1
MSMEG_1149	-	hypothetical protein MSMEG_1149	3	124.1	110.7	-0.16	744.3	664.36	-13.3	0.94	1
MSMEG_1150	-	hypothetical protein MSMEG_1150	13	89.8	64.9	-0.47	2335.3	1686.77	-24.9	0.61	1
MSMEG_1151	-	DNA-binding protein	10	112.9	52.5	-1.11	2258.7	1049.96	-60.4	0.21	1
MSMEG_1152	-	citrate-proton symporter	20	64.8	62.1	-0.06	2590.3	2482.03	-2.7	0.94	1
MSMEG_1153	-	FAD dependent oxidoreductase	18	86.2	39.1	-1.14	3103.3	1408.4	-47.1	0.053	1
MSMEG_1154	-	formyl-coenzyme A transferase	12	77.1	43.9	-0.81	1850.4	1053.58	-33.2	0.22	1
MSMEG_1155	-	carnitinyl-CoA dehydratase	5	32	431.6	3.75	320.4	4315.65	399.5	0.17	1
MSMEG_1156	-	dihydrodipicolinate synthetase	5	122.6	165.7	0.44	1225.8	1657.28	43.1	0.67	1
MSMEG_1157	-	short chain dehydrogenase	4	107.2	100.6	-0.09	857.9	804.83	-6.6	0.94	1
MSMEG_1158	-	5-oxovalerate dehydrogenase	11	73.9	120.4	0.7	1625.2	2647.87	46.5	0.33	1
MSMEG_1159	-	ABC transporter component A	14	32.7	32.8	0.01	914.3	918.28	0.1	1	1
MSMEG_1160	-	ABC-type nitrate/sulfonate/bicarbonate transport system ATPase component	7	22.6	42.8	0.92	316.8	599.17	20.2	0.63	1
MSMEG_1161	-	taurine transport system permease protein TauC	7	55.7	40	-0.48	779.4	559.46	-15.7	0.72	1
MSMEG_1162	-	nitrilotriacetate monooxygenase component A	18	13.6	38.6	1.5	491.3	1388.48	24.9	0.21	1
MSMEG_1163	-	hypothetical protein MSMEG_1163	2	361.9	143.7	-1.33	1447.7	574.97	-218.2	0.11	1
MSMEG_1165c	-	nucleotide-binding protein	3	380.3	325.5	-0.22	2281.6	1953.11	-54.8	0.83	1
MSMEG_1167c	-	cytochrome P450	15	103.3	116.9	0.18	3098.3	3506.38	13.6	0.79	1
MSMEG_1168	-	putative transcriptional regulator	5	96.4	66.1	-0.54	963.6	661.25	-30.2	0.57	1
MSMEG_1169	-	integral membrane transport protein	17	57.1	87.5	0.61	1942.9	2974.49	30.3	0.59	1
MSMEG_1170	-	hypothetical protein MSMEG_1170	0	0	0	0	0	0	0	1	1
MSMEG_1171c	-	low molecular weight phosphotyrosine protein phosphatase	6	51.3	75.5	0.56	615.7	906.25	24.2	0.62	1
MSMEG_1172c	arsB	arsenical-resistance protein	13	84.2	163.5	0.96	2189.9	4251.21	79.3	0.37	1
MSMEG_1173c	-	transcriptional regulator, ArsR family protein	2	182.8	585.3	1.68	731.1	2341.18	402.5	0.11	1
MSMEG_1174c	-	cadmium inducible protein cadi	3	164.3	53.9	-1.61	985.7	323.51	-110.4	0.39	1
MSMEG_1175	-	putative transcriptional regulatory protein	4	131	392.2	1.58	1048.1	3137.35	261.2	0.5	1
MSMEG_1176	-	hypothetical protein MSMEG_1176	23	18.6	113	2.6	855.6	5199.9	94.4	0.1	1
MSMEG_1177c	-	cytosine/purines/uracil/thiamine/allantoin permease family protein	23	75.2	29.1	-1.37	3460.5	1338.16	-46.1	0.0079	1
MSMEG_1178	-	transcriptional regulator	6	17.2	39.8	1.21	206	478.09	22.7	0.74	1
MSMEG_1179	hutU	urocanate hydratase	16	84.1	116.2	0.47	2692	3718.01	32.1	0.52	1
MSMEG_1180	-	allantoate amidohydrolase	8	24.1	15.7	-0.62	385.5	251.46	-8.4	0.74	1
MSMEG_1181	hutF	N-formimino-L-glutamate deiminase	15	54.7	105.6	0.95	1642.3	3168.13	50.9	0.34	1
MSMEG_1182	hutI	imidazolonepropionase	10	8.3	11.4	0.46	165.5	228.18	3.1	0.61	1
MSMEG_1183	hutH	histidine ammonia-lyase	5	77.4	41.4	-0.9	774	413.67	-36	0.28	1
MSMEG_1184	-	serine esterase, cutinase family protein	10	84.6	90.3	0.09	1692.5	1805.39	5.6	0.89	1
MSMEG_1185c	-	transcriptional regulator, AsnC family protein	12	185.5	226.6	0.29	4451.3	5439.06	41.2	0.93	1
MSMEG_1186	-	putative permease	19	184.6	188	0.03	7015.5	7142.25	3.3	0.92	1
MSMEG_1187	-	N-acyl-D-aspartate deacylase	20	215.5	239.3	0.15	8621.1	9573.57	23.8	0.89	1
MSMEG_1188c	-	hypothetical protein MSMEG_1188	14	324.5	316.8	-0.03	9086.3	8871.05	-7.7	0.92	1
MSMEG_1189	-	hypothetical protein MSMEG_1189	17	105.8	57.7	-0.88	3597.6	1960.47	-48.2	0.089	1
MSMEG_1190	-	serine/threonine-protein kinase PknD	23	122.8	381.1	1.63	5647.3	17528.5	258.3	0.21	1
MSMEG_1191c	-	hypothetical protein MSMEG_1191	1	206.2	240.1	0.22	412.4	480.29	34	1	1
MSMEG_1192c	-	M23 peptidase domain-containing protein	13	78.2	138.8	0.83	2033.1	3609.88	60.6	0.44	1
MSMEG_1193	-	TROVE domain-containing protein	21	80.9	114.3	0.5	3399.1	4799.53	33.3	0.64	1
MSMEG_1194c	-	hypothetical protein MSMEG_1194	3	83.3	222.4	1.42	499.6	1334.54	139.2	0.6	1
MSMEG_1195	-	hypothetical protein MSMEG_1195	13	178.6	289.9	0.7	4643.4	7537.31	111.3	0.32	1
MSMEG_1196c	-	SNF2 domain-containing protein	15	14.2	17.5	0.3	427.4	525.43	3.3	0.71	1
MSMEG_1197c	-	transcriptional regulator, LuxR family protein	2	238	203.1	-0.23	952.1	812.46	-34.9	0.67	1
MSMEG_1198	-	hypothetical protein MSMEG_1198	5	138.7	104.2	-0.41	1387.2	1041.81	-34.5	0.83	1
MSMEG_1199c	-	hypothetical protein MSMEG_1199	16	117.9	95.5	-0.3	3772.7	3054.69	-22.4	0.49	1
MSMEG_1200	-	serine/threonine-protein kinase PknD	16	309.5	290.9	-0.09	9903	9309.72	-18.5	0.89	1
MSMEG_1201c	-	hypothetical protein MSMEG_1201	4	24.1	4.1	-2.56	192.5	32.6	-20	0.53	1
MSMEG_1202	-	hypothetical protein MSMEG_1202	2	39.5	3.5	-3.5	158.1	13.97	-36	1	1
MSMEG_1203c	-	methoxy mycolic acid synthase 1	17	181.7	186.8	0.04	6176.8	6351.26	5.1	1	1
MSMEG_1204	-	3-oxoacyl-(acyl carrier protein) synthase II	9	190.2	209.2	0.14	3423.9	3766.13	19	0.86	1
MSMEG_1205c	-	cyclopropane-fatty-acyl-phospholipid synthase 1	13	75	153.7	1.03	1950.7	3995.35	78.6	0.045	1
MSMEG_1206c	-	hypothetical protein MSMEG_1206	0	0	0	0	0	0	0	1	1
MSMEG_1207	-	glycosyltransferase, group I	11	131.3	95	-0.47	2888.7	2090.99	-36.3	0.73	1
MSMEG_1208	-	glycosyltransferase, group I	8	65.7	47.5	-0.47	1051.9	760.72	-18.2	0.59	1
MSMEG_1209	-	glycosidase	20	78.4	165.4	1.08	3137.6	6616.45	87	0.128	1
MSMEG_1210c	-	hypothetical protein MSMEG_1210	9	261.4	210.8	-0.31	4704.8	3795.24	-50.5	0.67	1
MSMEG_1211	-	Fatty acid desaturase	18	129.1	131.1	0.02	4646.1	4719.86	2	0.98	1
MSMEG_1212	-	hypothetical protein MSMEG_1212	1	151	86.1	-0.81	302	172.3	-64.9	0.62	1
MSMEG_1213	-	cytochrome P450 monooxygenase	8	126.3	169.5	0.42	2020.9	2711.64	43.2	0.58	1
MSMEG_1214	-	oxidoreductase	10	130.9	47.3	-1.47	2617.7	945.05	-83.6	0.06	1
MSMEG_1215	-	serine/threonine-protein kinase PknE, putative	5	74.6	80.3	0.11	746.3	802.89	5.7	0.92	1
MSMEG_1216c	-	ABC-type transport system periplasmic substrate-binding protein	16	133.8	208.7	0.64	4280.8	6678.78	74.9	0.23	1
MSMEG_1217c	-	ABC-type transport system ATP-binding protein I	6	91.6	399.6	2.13	1099.2	4795.29	308	0.28	1
MSMEG_1218c	-	ABC-type transport system ATP-binding protein II	3	57.8	59.2	0.04	346.8	355.33	1.4	0.94	1
MSMEG_1219c	-	ABC-type transport system permease protein II	18	142.6	187.3	0.39	5133.8	6742.44	44.7	0.49	1
MSMEG_1220c	-	ABC-type transport system permease protein I	12	346.5	286.7	-0.27	8317.1	6881.21	-59.8	0.54	1
MSMEG_1221	-	rifampin ADP-ribosyl transferase	6	365.8	345.9	-0.08	4389.4	4150.56	-19.9	0.84	1
MSMEG_1222c	-	ISMsm6, transposase	18	223.7	191.7	-0.22	8051.8	6899.46	-32	0.73	1
MSMEG_1223c	-	hypothetical protein MSMEG_1223	3	724.3	416	-0.8	4345.6	2495.87	-308.3	0.25	1
MSMEG_1224	-	rifampin ADP-ribosyl transferase	1	1187	721.3	-0.72	2374	1442.54	-465.7	0.58	1
MSMEG_1225c	-	hypothetical protein MSMEG_1225	10	73	112.4	0.62	1459.3	2248.17	39.4	0.48	1
MSMEG_1226	-	sulfatase-modifying factor 1	10	76.5	137.4	0.85	1529.2	2747.74	60.9	0.92	1
MSMEG_1227	-	transcriptional regulator, GntR family protein	3	7.1	8.5	0.26	42.7	51.22	1.4	1	1
MSMEG_1228	-	sulfatase	20	73.4	50.9	-0.53	2934.7	2036.8	-22.4	0.52	1
MSMEG_1229	gyrB	DNA gyrase subunit B	21	58.9	94.8	0.69	2475.7	3981.37	35.8	0.5	1
MSMEG_1230c	-	hypothetical protein MSMEG_1230	2	85.4	34.9	-1.29	341.7	139.7	-50.5	0.46	1
MSMEG_1231c	-	inner membrane protein YidH	3	16.4	10.9	-0.59	98.3	65.19	-5.5	1	1
MSMEG_1232	-	ABC transporter substrate-binding protein	22	61.4	64.5	0.07	2699.5	2838.79	3.2	0.9	1
MSMEG_1234	-	taurine import ATP-binding protein TauB	3	74.1	40.4	-0.88	444.3	242.15	-33.7	0.56	1
MSMEG_1235	-	sulfate permease	9	101.9	183.4	0.85	1834.2	3301.76	81.5	0.94	1
MSMEG_1236c	-	Mpr protein	4	82.8	20.4	-2.02	662.6	162.98	-62.4	0.32	1
MSMEG_1237	-	hypothetical protein MSMEG_1237	2	0	1.2	1.11	0	4.66	1.2	1	1
MSMEG_1238	-	type III restriction enzyme, res subunit	76	47.2	50.6	0.1	7175.7	7688.78	3.4	0.75	1
MSMEG_1239c	-	ISMsm4, transposase	16	180.7	158.2	-0.19	5781.9	5061.72	-22.5	0.68	1
MSMEG_1240	-	hypothetical protein MSMEG_1240	63	47.5	50.6	0.09	5983.8	6376.35	3.1	0.81	1
MSMEG_1241	-	hypothetical protein MSMEG_1241	30	47.7	62.4	0.39	2862.3	3744.13	14.7	0.57	1
MSMEG_1242	iscS	cysteine desulfurase IscS	24	386.4	298.2	-0.37	18548.8	14312	-88.3	0.34	1
MSMEG_1243	-	hypothetical protein MSMEG_1243	26	291.3	438.8	0.59	15149	22817.3	147.5	0.37	1
MSMEG_1244	-	hypothetical protein MSMEG_1244	72	290	383.6	0.4	41761.4	55231.4	93.5	0.1	1
MSMEG_1245	-	phosphoadenosine phosphosulfate reductase	21	237.6	304	0.36	9977.3	12767.8	66.4	0.53	1
MSMEG_1246	-	hypothetical protein MSMEG_1246	36	302.3	418	0.47	21765	30097	115.7	0.27	1
MSMEG_1247	-	hypothetical protein MSMEG_1247	7	163	244.7	0.59	2282.2	3425.67	81.7	0.5	1
MSMEG_1248	-	hypothetical protein MSMEG_1248	24	127.2	224.1	0.82	6106	10755.5	96.9	0.19	1
MSMEG_1249c	-	ISMsm7, transposase orfB	12	76.8	84.6	0.14	1843.9	2029.42	7.7	0.86	1
MSMEG_1250c	-	ISMsm7, transposase orfA	2	251.2	99	-1.34	1004.8	395.82	-152.2	0.14	1
MSMEG_1251	-	hypothetical protein MSMEG_1251	8	695.1	837.3	0.27	11122.2	13396.3	142.1	0.77	1
MSMEG_1252	-	hypothetical protein MSMEG_1252	48	140.6	140.3	0	13497.5	13465	-0.3	0.99	1
MSMEG_1253	-	hypothetical protein MSMEG_1253	79	143.4	162.8	0.18	22663.8	25721.6	19.4	0.96	1
MSMEG_1254	-	DEAD/DEAH box helicase	102	248.9	234.1	-0.09	50778.3	47766.1	-14.8	0.73	1
MSMEG_1255	-	UvrD/Rep helicase	33	214.9	201.1	-0.1	14180.4	13273.1	-13.7	0.87	1
MSMEG_1256	-	hypothetical protein MSMEG_1256	7	39.6	50.4	0.35	553.8	705.36	10.8	0.71	1
MSMEG_1257	-	IS1096, tnpR protein	10	444.4	312.5	-0.51	8887.7	6249.45	-131.9	0.2	1
MSMEG_1258c	-	IS1096, tnpA protein	9	562	515.9	-0.12	10116	9286.16	-46.1	0.81	1
MSMEG_1259	-	hypothetical protein MSMEG_1259	8	275.1	199.1	-0.47	4401.8	3184.94	-76.1	0.52	1
MSMEG_1260c	-	hypothetical protein MSMEG_1260	19	183.4	355.1	0.95	6970	13494.8	171.7	0.5	1
MSMEG_1261	-	hypothetical protein MSMEG_1261	26	101.3	181	0.84	5266.7	9410.75	79.7	0.25	1
MSMEG_1262	-	hypothetical protein MSMEG_1262	3	407.3	318.3	-0.36	2443.9	1909.91	-89	0.54	1
MSMEG_1263c	-	hypothetical protein MSMEG_1263	11	282	189.1	-0.58	6203	4160.92	-92.8	0.16	1
MSMEG_1264	-	prophage Lp1 protein 5	9	160.1	123.5	-0.37	2881.9	2222.55	-36.6	0.51	1
MSMEG_1265c	-	hypothetical protein MSMEG_1265	21	164.4	299.2	0.86	6906.5	12566.7	134.8	0.3	1
MSMEG_1266c	-	ankyrin repeat-containing protein	4	103.3	89.1	-0.21	826.3	712.47	-14.2	0.85	1
MSMEG_1268	-	nudix hydrolase	5	39.7	32.1	-0.31	397.3	321.31	-7.6	0.8	1
MSMEG_1269c	-	Ser/Thr protein phosphatase family protein	21	124.3	84.6	-0.56	5220.3	3551.78	-39.7	0.25	1
MSMEG_1270c	-	hypothetical protein MSMEG_1270	4	269.2	361.3	0.42	2153.3	2890.53	92.2	0.48	1
MSMEG_1271c	-	hypothetical protein MSMEG_1271	7	155.4	126	-0.3	2175.3	1764.25	-29.4	0.56	1
MSMEG_1272c	-	putative ribosylglycohydrolase	14	55.6	85.2	0.61	1558.1	2385.93	29.6	0.31	1
MSMEG_1273c	-	hypothetical protein MSMEG_1273	7	258.6	168.3	-0.62	3620.9	2356.82	-90.3	0.45	1
MSMEG_1274c	-	gluconolactonase	12	185.9	193.3	0.06	4462.5	4638.75	7.3	0.9	1
MSMEG_1275c	-	HNH nuclease, putative	12	36.4	20.1	-0.86	872.6	481.84	-16.3	0.26	1
MSMEG_1276	-	hypothetical protein MSMEG_1276	2	143.5	47.7	-1.59	574.1	190.92	-95.8	0.15	1
MSMEG_1277	-	hypothetical protein MSMEG_1277	0	0	0	0	0	0	0	1	1
MSMEG_1278	-	death-on-curing protein	6	228.5	290.3	0.35	2741.6	3484.01	61.9	0.78	1
MSMEG_1279	-	hypothetical protein MSMEG_1279	18	176	249.8	0.51	6337.4	8994.34	73.8	0.47	1
MSMEG_1280	-	putative cytoplasmic protein	11	174.9	134.7	-0.38	3847.4	2963.36	-40.2	0.59	1
MSMEG_1281	-	hypothetical protein MSMEG_1281	32	184.7	139.6	-0.4	11817.9	8937.41	-45	0.29	1
MSMEG_1282	-	putative cytoplasmic protein	16	96.8	211.7	1.13	3097	6773.74	114.9	0.2	1
MSMEG_1283	-	ribbon-helix-helix transcription factor, family protein	5	281	497.6	0.82	2810.2	4976.25	216.6	0.45	1
MSMEG_1284	-	PilT domain-containing protein	7	219.2	129.3	-0.76	3068.6	1810.56	-89.9	0.4	1
MSMEG_1285c	-	TPR repeat-containing protein	18	84.3	52.3	-0.69	3034	1884.41	-31.9	0.26	1
MSMEG_1286c	-	sulfatase family protein	28	68.5	95.5	0.48	3834.4	5347.74	27	0.46	1
MSMEG_1287c	-	cyclase/dehydrase superfamily protein	6	146	193.3	0.4	1752.5	2319.19	47.2	0.81	1
MSMEG_1288	-	hypothetical protein MSMEG_1288	10	70.8	106.3	0.59	1415.2	2126.83	35.6	0.71	1
MSMEG_1289c	-	hypothetical protein MSMEG_1289	10	167.9	188.9	0.17	3358.4	3778.41	21	0.67	1
MSMEG_1290	ilvD	dihydroxy-acid dehydratase	18	73.3	52.9	-0.47	2638.1	1904.47	-20.4	0.56	1
MSMEG_1291c	-	putative oxidoreductase	25	66.9	97.8	0.55	3342.8	4889.83	30.9	0.42	1
MSMEG_1292c	-	FAD binding domain-containing protein	4	105.6	42.8	-1.3	845.1	342.14	-62.9	0.83	1
MSMEG_1293	-	xanthine/uracil permeases family protein	16	131.3	56.1	-1.23	4200.1	1795.42	-75.1	0.058	1
MSMEG_1294	-	putative OHCU decarboxylase	4	97.7	77.6	-0.33	781.4	620.51	-20.1	0.7	1
MSMEG_1295	-	transthyretin	9	60.4	62.7	0.05	1087.5	1128.09	2.3	0.97	1
MSMEG_1296	-	uricase	12	33.8	31	-0.13	812	743.78	-2.8	0.93	1
MSMEG_1297	-	hydroxydechloroatrazine ethylaminohydrolase	11	62.7	30.6	-1.03	1378.4	672.76	-32.1	0.32	1
MSMEG_1298	-	guanine deaminase	16	11.6	36.9	1.67	371.9	1182.28	25.3	0.028	1
MSMEG_1299	-	oxidoreductase, 2OG-Fe(II) oxygenase family protein	10	109.6	65.3	-0.75	2192.1	1305.04	-44.4	0.25	1
MSMEG_1300	-	hypothetical protein MSMEG_1300	6	105	243.2	1.21	1260.5	2917.84	138.1	0.66	1
MSMEG_1301	-	NanT3	3	162.5	77.9	-1.06	974.8	467.35	-84.6	0.4	1
MSMEG_1302	-	alkylphosphonate uptake protein	2	67.5	22.1	-1.61	270	88.48	-45.4	0.3	1
MSMEG_1303c	-	putative transcriptional regulator	7	81.2	41.9	-0.95	1136.3	586.23	-39.3	0.19	1
MSMEG_1304	-	rhizopine catabolism protein	14	74.6	47.3	-0.66	2088.7	1324.19	-27.3	0.54	1
MSMEG_1305c	-	TetR family protein regulatory protein	11	135	238	0.82	2970.1	5235.08	103	0.44	1
MSMEG_1306c	-	aldehyde dehydrogenase (NAD) family protein	21	101.4	68.4	-0.57	4257.2	2873.45	-32.9	0.34	1
MSMEG_1307c	-	EthD protein	6	119.7	79.3	-0.59	1436.9	951.65	-40.4	0.35	1
MSMEG_1308c	-	peptidase S15	23	43.3	25.2	-0.78	1990.5	1161.46	-18	0.15	1
MSMEG_1309	-	hypothetical protein MSMEG_1309	2	0	15.1	4.01	0	60.54	15.1	1	1
MSMEG_1310	-	TnpC protein	18	139.7	111.3	-0.33	5029	4007.11	-28.4	0.42	1
MSMEG_1311c	-	oligopeptide transporter, OPT family protein	14	228.2	210.1	-0.12	6390.9	5881.69	-18.2	0.83	1
MSMEG_1312	-	hypothetical protein MSMEG_1312	7	210	172.2	-0.29	2940.2	2410.64	-37.8	0.83	1
MSMEG_1313	-	secreted protein	21	102.4	85.4	-0.26	4301.7	3584.77	-17.1	0.74	1
MSMEG_1314c	-	hypothetical protein MSMEG_1314	8	180.1	152.4	-0.24	2881.3	2438.05	-27.7	0.82	1
MSMEG_1315	-	transporter, small conductance mechanosensitive ion channel (MscS) family protein	11	271	205.2	-0.4	5962	4514.69	-65.8	0.45	1
MSMEG_1316c	prfC	peptide chain release factor 3	12	80	85.3	0.09	1920.8	2046.25	5.2	0.96	1
MSMEG_1317c	-	transcriptional regulator	4	4	8.1	1.01	32.4	65.19	4.1	0.7	1
MSMEG_1318c	-	polysaccharide deacetylase family protein	11	103.1	47.4	-1.12	2267.5	1043.1	-55.7	0.12	1
MSMEG_1319c	-	Asp/Glu racemase	8	119.8	242.8	1.02	1916.5	3885.41	123.1	0.36	1
MSMEG_1320c	-	major facilitator superfamily protein MFS_1	13	117.3	90.4	-0.38	3049.7	2351.51	-26.9	0.5	1
MSMEG_1321	-	5-carboxymethyl-2-hydroxymuconate delta-isomerase	7	199.1	333.3	0.74	2786.8	4666.05	134.2	0.83	1
MSMEG_1322	-	ErfK/YbiS/YcfS/YnhG family protein	17	407.6	443.4	0.12	13858.9	15074	35.7	0.82	1
MSMEG_1323	-	hypothetical protein MSMEG_1323	2	286.9	340.9	0.25	1147.7	1363.77	54	1	1
MSMEG_1324c	-	hypothetical protein MSMEG_1324	1	81.6	27.9	-1.55	163.3	55.88	-53.7	0.59	1
MSMEG_1325c	recD	exodeoxyribonuclease V, alpha subunit	12	78	55	-0.5	1871.5	1319.53	-23	0.37	1
MSMEG_1326	-	hypothetical protein MSMEG_1326	2	55.3	2.3	-4.57	221.1	9.31	-52.9	0.36	1
MSMEG_1327c	recB	exodeoxyribonuclease V, beta subunit	26	58.3	72.8	0.32	3032.4	3783.59	14.4	0.52	1
MSMEG_1328c	recC	exodeoxyribonuclease V, gamma subunit	23	95.6	80.4	-0.25	4396.1	3697.31	-15.2	0.71	1
MSMEG_1329c	-	major facilitator superfamily protein MFS_1, putative	5	291	107.3	-1.44	2910.1	1072.72	-183.7	0.26	1
MSMEG_1330c	-	MarR-family protein transcriptional regulator	4	283	341.1	0.27	2264.3	2728.72	58	0.68	1
MSMEG_1331c	-	enoyl-CoA hydratase	4	295.7	163.3	-0.86	2365.2	1306.07	-132.4	0.35	1
MSMEG_1332c	-	hypothetical protein MSMEG_1332	16	173.2	207.3	0.26	5541.4	6633.12	34.1	0.6	1
MSMEG_1333c	-	hypothetical protein MSMEG_1333	11	360	473.1	0.39	7920	10408.9	113.1	0.6	1
MSMEG_1334c	-	metallo-beta-lactamase family protein	8	99.7	111.5	0.16	1595.9	1784.17	11.8	0.82	1
MSMEG_1335	-	transcriptional regulator, BadM/Rrf2 family protein	2	84.6	88.5	0.07	338.3	353.91	3.9	1	1
MSMEG_1336	-	flavohemoprotein, putative	10	142.7	208.1	0.54	2854.2	4161.57	65.4	0.45	1
MSMEG_1339	rpmG	ribosomal protein L33	3	94.2	63.2	-0.57	564.9	379.39	-30.9	0.57	1
MSMEG_1340	-	(3R)-hydroxyacyl-ACP dehydratase subunit HadA	10	130.8	193.7	0.57	2615.7	3874.28	62.9	0.56	1
MSMEG_1341	-	(3R)-hydroxyacyl-ACP dehydratase subunit HadB	3	0	0	0	0	0	0	1	1
MSMEG_1342	-	(3R)-hydroxyacyl-ACP dehydratase subunit HadC	4	13.9	62.9	2.18	110.9	503.58	49.1	0.37	1
MSMEG_1344	secE	preprotein translocase subunit SecE	5	0	0	0	0	0	0	1	1
MSMEG_1345	nusG	transcription antitermination protein NusG	5	1.2	6	2.31	12.1	60.28	4.8	1	1
MSMEG_1346	rplK	50S ribosomal protein L11	2	2	0	-1.6	8.1	0	-2	1	1
MSMEG_1347	rplA	50S ribosomal protein L1	6	0	0	0	0	0	0	1	1
MSMEG_1348c	-	RNA polymerase ECF-subfamily protein sigma factor	12	70.2	50.7	-0.47	1684.4	1217.34	-19.5	0.44	1
MSMEG_1349c	-	DGPF domain-containing protein	8	420.2	231.7	-0.86	6723.1	3706.87	-188.5	0.61	1
MSMEG_1350c	-	cyclopropane-fatty-acyl-phospholipid synthase 1	16	181.7	173.5	-0.07	5815.7	5552.1	-8.2	0.93	1
MSMEG_1351c	-	cyclopropane-fatty-acyl-phospholipid synthase 1	13	189.3	224.6	0.25	4923	5840.83	35.3	0.82	1
MSMEG_1352c	-	hydrolase, alpha/beta fold family protein	8	148.2	271.7	0.87	2371.9	4346.68	123.4	0.59	1
MSMEG_1353c	-	ABC1 family protein	10	8.8	136.1	3.96	175.4	2722.13	127.3	0.16	1
MSMEG_1355	-	transcriptional regulator, TetR family protein	4	246.8	121.1	-1.03	1974.1	968.59	-125.7	0.38	1
MSMEG_1356c	-	hypothetical protein MSMEG_1356	6	103.4	129.8	0.33	1241.3	1557.93	26.4	0.71	1
MSMEG_1357c	-	hypothetical protein MSMEG_1357	7	103	90.4	-0.19	1442.2	1265.59	-12.6	0.81	1
MSMEG_1358c	-	hypothetical protein MSMEG_1358	4	237.1	207.2	-0.19	1896.8	1657.78	-29.9	0.88	1
MSMEG_1359	-	DeoR-family protein transcriptional regulator	14	82.2	67.6	-0.28	2301.2	1893.61	-14.6	0.75	1
MSMEG_1360	-	endonuclease/exonuclease/phosphatase	8	439.5	276.3	-0.67	7031.8	4420.25	-163.2	0.33	1
MSMEG_1361	-	alpha-mannosidase	44	75.1	81	0.11	6610.4	7127.26	5.9	0.86	1
MSMEG_1362	-	hypothetical protein MSMEG_1362	4	34.8	36.9	0.09	278.6	295.57	2.1	1	1
MSMEG_1363	-	glucokinase	4	130.8	85.1	-0.62	1046.6	680.79	-45.7	0.67	1
MSMEG_1364	rplJ	50S ribosomal protein L10	3	0	5	2.59	0	30.14	5	1	1
MSMEG_1365	rplL	50S ribosomal protein L7/L12	0	0	0	0	0	0	0	1	1
MSMEG_1366	-	ABC transporter, ATP-binding protein	11	349.8	219.7	-0.67	7696.4	4833.68	-130.1	0.39	1
MSMEG_1367	rpoB	DNA-directed RNA polymerase subunit beta	32	0.7	4.4	2.66	44.5	280.57	3.7	0.04	1
MSMEG_1368	rpoC	DNA-directed RNA polymerase subunit beta'	46	6.8	3.9	-0.79	621.5	360.25	-2.8	0.48	1
MSMEG_1369c	-	LacI-family protein transcriptional regulator	8	47.9	95	0.99	765.7	1519.77	47.1	0.33	1
MSMEG_1370	-	2-deoxy-scyllo-inosamine dehydrogenase	9	88.7	182.1	1.04	1596.2	3278.48	93.5	0.87	1
MSMEG_1371	-	hypothetical protein MSMEG_1371	6	98.6	299.1	1.6	1183.3	3589.45	200.5	0.71	1
MSMEG_1372	-	ABC transporter ATP-binding protein	2	33.1	87.6	1.4	132.4	350.42	54.5	0.64	1
MSMEG_1373	-	ribose/xylose/arabinose/galactoside ABC-type transport systems, permease components	11	71.6	63.8	-0.16	1574.3	1404.52	-7.7	0.81	1
MSMEG_1374	-	ribose ABC transporter, periplasmic binding protein	8	229.2	119.1	-0.94	3667.7	1905.5	-110.1	0.043	1
MSMEG_1375c	-	tagatose-1,6-bisphosphate aldolase GatY	3	46.2	49.7	0.11	277	298.03	3.5	0.93	1
MSMEG_1376	-	putative xylulose kinase	4	58.4	183.3	1.65	466.8	1466.1	124.9	0.86	1
MSMEG_1377	-	DeoR-family protein transcriptional regulator	4	16	4.7	-1.78	128.2	37.25	-11.4	0.81	1
MSMEG_1378	-	1-phosphofructokinase	5	88.2	303.9	1.78	882.1	3039.05	215.7	0.63	1
MSMEG_1379	-	hypothetical protein MSMEG_1379	12	154.3	107.8	-0.52	3702.9	2586.94	-46.5	0.51	1
MSMEG_1380c	-	transcriptional regulator	4	69.4	154.2	1.15	555.2	1233.39	84.8	0.32	1
MSMEG_1381	-	MmpS5 protein	5	241.2	212.7	-0.18	2411.9	2127.35	-28.5	0.77	1
MSMEG_1382	-	MmpL5 protein	29	104.5	144	0.46	6063.4	8350.3	39.4	0.41	1
MSMEG_1383	-	endonuclease IV	4	463.2	430.5	-0.11	3705.6	3443.91	-32.7	0.87	1
MSMEG_1384c	-	hypothetical protein MSMEG_1384	6	431.5	795.8	0.88	5177.6	9549.44	364.3	1	1
MSMEG_1385	-	PAP2 superfamily protein	14	522.5	600.2	0.2	14631.2	16805.4	77.6	0.68	1
MSMEG_1386	-	hypothetical protein MSMEG_1386	10	267.1	365.5	0.45	5341.8	7309.92	98.4	0.88	1
MSMEG_1387	-	putative acyl-CoA dehydrogenase	17	192.4	221.2	0.2	6542	7519.97	28.8	0.66	1
MSMEG_1388	-	enoyl-CoA hydratase	7	85.8	108.3	0.33	1201.6	1515.64	22.4	0.74	1
MSMEG_1389	-	hypothetical protein MSMEG_1389	5	34.2	50.2	0.55	341.8	501.63	16	0.71	1
MSMEG_1390	-	enoyl-CoA hydratase	7	19.7	28.8	0.55	275.9	403.84	9.1	0.62	1
MSMEG_1391c	-	transcriptional regulator, LysR family protein	13	36.5	43.9	0.27	948.1	1140.25	7.4	0.95	1
MSMEG_1392	-	alcohol dehydrogenase, class IV	12	36.4	45.4	0.32	874	1089.03	9	0.78	1
MSMEG_1393c	-	hypothetical protein MSMEG_1393	2	819.9	888.3	0.12	3279.4	3553.22	68.4	0.93	1
MSMEG_1394c	-	transmembrane protein	4	223	150	-0.57	1783.7	1199.62	-73	0.59	1
MSMEG_1395	-	putative lipoprotein	4	475.1	298.7	-0.67	3800.4	2389.67	-176.3	0.26	1
MSMEG_1396	-	LprB protein	2	715	772.3	0.11	2859.9	3089.35	57.4	0.94	1
MSMEG_1397	-	transcriptional regulator, TetR family protein	8	203.7	291.7	0.52	3259.8	4667.98	88	0.66	1
MSMEG_1398	rpsL	30S ribosomal protein S12	4	0.5	3.8	2.9	4	30.14	3.3	1	1
MSMEG_1399	rpsG	30S ribosomal protein S7	5	0	0.5	0.55	0	4.66	0.5	1	1
MSMEG_1401	tuf	elongation factor Tu	10	0.4	3	2.9	8.1	60.28	2.6	0.46	1
MSMEG_1402	-	hypothetical protein MSMEG_1402	3	191.1	107.5	-0.83	1146.3	644.82	-83.6	0.45	1
MSMEG_1403	-	cutinase superfamily protein	8	178.9	119.8	-0.58	2861.9	1916.24	-59.1	0.34	1
MSMEG_1404	-	IS1096, tnpA protein	9	568.9	513.5	-0.15	10240.2	9243.08	-55.4	0.81	1
MSMEG_1405c	-	IS1096, tnpR protein	10	378.2	318.6	-0.25	7564.8	6372.72	-59.6	0.58	1
MSMEG_1406	-	hypothetical protein MSMEG_1406	8	52	298.8	2.52	832.5	4781.06	246.8	0.28	1
MSMEG_1409	arcA	arginine deiminase	22	135.6	190.8	0.49	5965.8	8395.84	55.2	0.57	1
MSMEG_1410	fabG	3-ketoacyl-(acyl-carrier-protein) reductase	10	74.5	101.2	0.44	1489.7	2024.65	26.7	0.8	1
MSMEG_1411c	-	universal stress protein family protein	9	34.2	47.5	0.47	615.2	854.12	13.3	0.8	1
MSMEG_1412c	-	amino acid permease	16	118.9	117.5	-0.02	3805.7	3759.14	-1.5	1	1
MSMEG_1413c	rocD	ornithine--oxo-acid transaminase	6	142.8	180.7	0.34	1713.7	2168.75	37.9	0.9	1
MSMEG_1414c	-	amidinotransferase	11	168.2	169.1	0.01	3701	3720.47	0.9	1	1
MSMEG_1415	-	AsnC-family protein transcriptional regulator	2	414.8	153.7	-1.43	1659.3	614.68	-261.2	0.15	1
MSMEG_1416	-	pyridine nucleotide-disulphide oxidoreductase	10	142	102.8	-0.47	2840.9	2055.03	-39.3	0.45	1
MSMEG_1417c	-	glyoxalase family protein	20	44.2	45.8	0.05	1767.9	1831.9	1.6	0.93	1
MSMEG_1418c	-	RNA polymerase ECF-type sigma factor	10	90.4	65.9	-0.46	1807.3	1317.59	-24.5	0.71	1
MSMEG_1419	-	hypothetical protein MSMEG_1419	2	251.6	140.3	-0.84	1006.3	561	-111.3	0.52	1
MSMEG_1420c	-	transcriptional regulatory protein	9	42.6	134.2	1.66	766.9	2415.69	91.6	0.6	1
MSMEG_1421	-	hypothetical protein MSMEG_1421	5	145.5	285.2	0.97	1454.9	2851.99	139.7	0.24	1
MSMEG_1422	-	hypothetical protein MSMEG_1422	3	85.3	39.6	-1.11	512	237.49	-45.8	0.36	1
MSMEG_1423	-	radical SAM domain-containing protein	7	99.8	27.9	-1.84	1397	391.16	-71.8	0.025	1
MSMEG_1424	-	FMN-dependent dehydrogenase	9	65.4	190.7	1.54	1177	3432.92	125.3	0.07	1
MSMEG_1425	-	creatininase subfamily protein	12	86.7	258.9	1.58	2079.8	6212.74	172.2	0.4	1
MSMEG_1426	-	membrane sugar transferase	12	68.3	112.2	0.71	1640.3	2692.37	43.8	0.54	1
MSMEG_1427c	-	transmembrane efflux protein	13	43.5	25.2	-0.79	1131.3	655.56	-18.3	0.3	1
MSMEG_1428	-	glucose-methanol-choline oxidoreductase	12	46.4	7.7	-2.6	1112.4	183.81	-38.7	0.111	1
MSMEG_1429c	-	cytochrome P450-terp	15	122.4	112	-0.13	3673.4	3361	-10.4	0.9	1
MSMEG_1430	-	transcriptional regulator, TetR family protein	5	67.7	183.2	1.44	677.2	1831.52	115.4	0.4	1
MSMEG_1431c	-	cytochrome P450-terp	17	467.1	469.9	0.01	15883	15976.1	2.7	1	1
MSMEG_1432	-	acetylcholinesterase	17	136.8	61.3	-1.16	4649.7	2084.91	-75.4	0.11	1
MSMEG_1433c	-	thioesterase	12	101.7	83.7	-0.28	2441.6	2008.2	-18.1	0.63	1
MSMEG_1434	-	hypothetical protein MSMEG_1434	5	97	247	1.35	970.1	2469.88	150	0.72	1
MSMEG_1435	rpsJ	30S ribosomal protein S10	4	0	3.8	2.25	0	30.14	3.8	1	1
MSMEG_1436	rplC	50S ribosomal protein L3	7	0	0	0	0	0	0	1	1
MSMEG_1437	rplD	50S ribosomal protein L4	4	0	0	0	0	0	0	1	1
MSMEG_1438	rplW	50S ribosomal protein L23	4	0.5	0	-0.59	4	0	-0.5	1	1
MSMEG_1439	rplB	50S ribosomal protein L2	11	0.4	0	-0.45	8.1	0	-0.4	0.41	1
MSMEG_1440	rpsS	30S ribosomal protein S19	1	0	0	0	0	0	0	1	1
MSMEG_1441	-	50S ribosomal protein L22	3	0.7	0	-0.74	4	0	-0.7	1	1
MSMEG_1442	rpsC	30S ribosomal protein S3	12	0.2	3.8	4.48	4	90.42	3.6	0.24	1
MSMEG_1443	rplP	50S ribosomal protein L16	6	0	0	0	0	0	0	1	1
MSMEG_1444	rpmC	50S ribosomal protein L29	3	1.3	0	-1.23	8.1	0	-1.3	0.4	1
MSMEG_1445	-	30S ribosomal protein S17	7	0	0	0	0	0	0	1	1
MSMEG_1446	-	NTP pyrophosphohydrolase	5	169.1	83.4	-1.02	1690.9	833.55	-85.7	0.27	1
MSMEG_1447c	-	transcriptional regulator, MerR family protein	4	55.8	25.6	-1.12	446.1	204.89	-30.1	0.8	1
MSMEG_1448c	-	integral membrane transporter	11	153.9	221.6	0.53	3385.1	4875.86	67.8	0.9	1
MSMEG_1450	-	hypothetical protein MSMEG_1450	0	0	0	0	0	0	0	1	1
MSMEG_1451	-	arylsulfatase	34	188.5	287.5	0.61	12815.6	19548.1	99	0.41	1
MSMEG_1452	-	sulfatase-modifying factor 1	10	30.6	55.9	0.87	611.2	1117.74	25.3	0.41	1
MSMEG_1453c	-	citrate transporter	10	215.6	448.2	1.06	4312.5	8963.97	232.6	0.2	1
MSMEG_1454	-	hypothetical protein MSMEG_1454	1	0	0	0	0	0	0	1	1
MSMEG_1455	-	putative multidrug resistance protein	10	128.8	66.5	-0.95	2575.5	1330.53	-62.2	0.22	1
MSMEG_1456c	-	hypothetical protein MSMEG_1456	10	138.1	287.8	1.06	2762.4	5755.99	149.7	0.33	1
MSMEG_1457	-	hypothetical protein MSMEG_1457	2	76.8	88.8	0.21	307.3	355.33	12	0.93	1
MSMEG_1458	-	tena/thi-4 family protein	15	150.2	142.4	-0.08	4506	4270.73	-7.8	0.92	1
MSMEG_1459	-	Rieske (2Fe-2S) domain-containing protein	5	62.4	45.9	-0.45	624.4	458.56	-16.6	0.67	1
MSMEG_1460	-	pyridine nucleotide-disulphide oxidoreductase	7	25.1	54.9	1.13	351.5	769.01	29.8	0.37	1
MSMEG_1461	-	5-oxovalerate dehydrogenase	9	66.1	71.7	0.12	1190.6	1290.04	5.5	0.84	1
MSMEG_1462	-	ferredoxin	4	145.8	57.6	-1.34	1166.4	461.01	-88.2	0.11	1
MSMEG_1463	-	gamma-glutamyltranspeptidase	11	94.3	96.3	0.03	2073.8	2118.3	2	0.98	1
MSMEG_1464	-	translation initiation inhibitor	5	275	273.8	-0.01	2750.4	2738.15	-1.2	1	1
MSMEG_1465	rplN	ribosomal protein L14	2	0	0	0	0	0	0	1	1
MSMEG_1466	rplX	50S ribosomal protein L24	2	0	0	0	0	0	0	1	1
MSMEG_1467	rplE	50S ribosomal protein L5	5	0	0	0	0	0	0	1	1
MSMEG_1468	rpsN	ribosomal protein S14p/S29e	2	0	0	0	0	0	0	1	1
MSMEG_1469	rpsH	30S ribosomal protein S8	6	0	2.5	1.81	0	30.14	2.5	1	1
MSMEG_1470	rplF	50S ribosomal protein L6	7	0	2.2	1.66	0	30.14	2.2	1	1
MSMEG_1471	rplR	50S ribosomal protein L18	2	0	0	0	0	0	0	1	1
MSMEG_1472	rpsE	30S ribosomal protein S5	5	0	6	2.81	0	60.28	6	1	1
MSMEG_1473	rpmD	ribosomal protein L30	3	0	0	0	0	0	0	1	1
MSMEG_1474	rplO	50S ribosomal protein L15	3	4.2	1.6	-1.45	25.4	9.31	-2.7	0.63	1
MSMEG_1475c	-	hypothetical protein MSMEG_1475	8	183.2	115.2	-0.67	2931.8	1842.9	-68.1	0.36	1
MSMEG_1476	sppA	signal peptide peptidase SppA, 67K type	14	149.3	67.3	-1.15	4180	1883.9	-82	0.24	1
MSMEG_1477	-	major facilitator superfamily protein	26	183.7	127.1	-0.53	9553	6606.97	-56.7	0.14	1
MSMEG_1478	-	transporter, LysE family protein	8	110.4	518.9	2.23	1766.9	8302.2	408.5	0.31	1
MSMEG_1479c	-	methyltransferase, putative, family protein	9	68.1	65.4	-0.06	1225.2	1176.85	-2.7	0.92	1
MSMEG_1480c	-	methyltransferase	10	75	109.8	0.55	1499.4	2195.52	34.8	0.48	1
MSMEG_1481c	-	methyltransferase	9	88.1	41.6	-1.08	1586.3	749.21	-46.5	0.15	1
MSMEG_1482c	-	methyltransferase	5	193.3	131.3	-0.56	1932.9	1313.19	-62	0.45	1
MSMEG_1483	secY	preprotein translocase subunit SecY	25	29.9	34.3	0.2	1496.9	1717.3	4.4	0.9	1
MSMEG_1484	adk	adenylate kinase	7	0	0	0	0	0	0	1	1
MSMEG_1485	map	methionine aminopeptidase	8	224.2	525.3	1.23	3587.7	8404.51	301.1	0.6	1
MSMEG_1486	-	RNA polymerase sigma factor SigL	10	163.4	121.9	-0.42	3268.7	2438.18	-41.5	0.65	1
MSMEG_1487	-	hypothetical protein MSMEG_1487	5	153.9	73.3	-1.07	1538.8	732.78	-80.6	0.49	1
MSMEG_1488	-	acetolactate synthase	18	92.5	101.3	0.13	3330.9	3647.13	8.8	0.9	1
MSMEG_1489	-	hypothetical protein MSMEG_1489	11	140.8	197.9	0.49	3097.4	4353.54	57.1	0.6	1
MSMEG_1490	-	3-oxoacyl-ACP synthase III	9	178.8	101.2	-0.82	3218.5	1821.16	-77.6	0.18	1
MSMEG_1491	-	histidinol-phosphate aminotransferase 2	13	116.5	180.4	0.63	3028	4689.34	63.9	0.64	1
MSMEG_1492	-	transcriptional regulator, MarR family protein	1	29.9	72	1.27	59.8	144.1	42.1	0.36	1
MSMEG_1493c	-	sensor histidine kinase	6	80.8	95.7	0.24	970.1	1147.88	14.8	0.81	1
MSMEG_1494c	-	transcriptional regulatory protein DegU	6	151.6	230.5	0.6	1819.5	2765.97	78.9	0.76	1
MSMEG_1495	-	HAD-superfamily protein hydrolase subfamily protein IA, variant 3, putative	5	325.5	81.5	-2	3254.9	814.66	-244	0.17	1
MSMEG_1496c	mmsB	3-hydroxyisobutyrate dehydrogenase	3	52.6	154.8	1.56	315.7	928.5	102.1	0.38	1
MSMEG_1497c	-	acyl-CoA dehydrogenase family protein member 8	15	67.4	72.8	0.11	2022.9	2183.35	5.3	0.81	1
MSMEG_1498c	mmsA	methylmalonate-semialdehyde dehydrogenase	17	90.4	45.2	-1	3075.2	1536.19	-45.3	0.057	1
MSMEG_1499	-	oxygenase	9	194.7	70.7	-1.46	3505.3	1273.48	-124	0.028	1
MSMEG_1500	-	TetR family protein transcriptional regulatory protein	10	60.4	42.6	-0.5	1208	851.66	-17.8	0.28	1
MSMEG_1501	-	methyltransferase, putative, family protein	16	69.5	67.9	-0.03	2223.2	2172.49	-1.6	0.94	1
MSMEG_1502	-	ABC transporter, ATP-binding protein	12	54.3	34.6	-0.65	1302.7	830.83	-19.7	0.39	1
MSMEG_1503	-	antibiotic ABC transporter transmembrane protein	10	55.9	83.4	0.58	1117.6	1667.63	27.5	0.77	1
MSMEG_1504	-	antibiotic ABC transporter transmembrane protein	11	134.2	189.3	0.5	2952.2	4164.93	55.1	0.45	1
MSMEG_1505c	-	integral membrane protein	4	60.7	118.7	0.97	485.9	949.33	57.9	0.64	1
MSMEG_1506c	-	transcriptional regulator, TetR family protein	12	137.5	247.9	0.85	3299.7	5948.84	110.4	0.32	1
MSMEG_1507	-	D-aminopeptidase	7	72.8	177.7	1.29	1019	2487.99	104.9	0.37	1
MSMEG_1508	-	amino acid permease-associated region	15	75.3	177.5	1.24	2260	5325.76	102.2	0.36	1
MSMEG_1509c	-	TetR-family protein transcriptional regulator	7	111	173.2	0.64	1554.3	2425	62.2	0.51	1
MSMEG_1510c	-	dTDP-4-dehydrorhamnose 3,5-epimerase	5	0.4	3	2.9	4	30.14	2.6	1	1
MSMEG_1511	-	putative oxidoreductase	2	152.7	17.5	-3.13	610.8	69.85	-135.2	0.54	1
MSMEG_1512c	rfbB	dTDP-glucose 4,6-dehydratase	14	0.6	1.2	1.1	16.2	34.8	0.7	0.74	1
MSMEG_1513c	-	hypothetical protein MSMEG_1513	9	130.9	147.5	0.17	2356.6	2655.24	16.6	0.84	1
MSMEG_1514c	-	hypothetical protein MSMEG_1514	11	159	186.5	0.23	3499	4102.84	27.4	0.63	1
MSMEG_1515c	-	two-component sensor histidine kinase	14	210.7	183	-0.2	5899.8	5123.81	-27.7	0.72	1
MSMEG_1516c	-	thioredoxin reductase	20	314.9	298.9	-0.08	12596.8	11955	-16	0.83	1
MSMEG_1517c	-	SPFH domain-containing protein/band 7 family protein	7	321.9	219.3	-0.55	4506.3	3070.58	-102.5	0.37	1
MSMEG_1518c	-	hypothetical protein MSMEG_1518	6	545.6	817.5	0.58	6546.6	9809.53	271.9	0.32	1
MSMEG_1519	infA	translation initiation factor IF-1	4	2	0	-1.6	16.2	0	-2	0.48	1
MSMEG_1520	rpmJ	50S ribosomal protein L36	0	0	0	0	0	0	0	1	1
MSMEG_1521	rpsM	30S ribosomal protein S13	5	0	6	2.81	0	60.28	6	1	1
MSMEG_1522	rpsK	30S ribosomal protein S11	1	0	45.2	5.53	0	90.42	45.2	1	1
MSMEG_1523	rpsD	30S ribosomal protein S4	11	0.4	1.4	1.9	8.1	30.14	1	1	1
MSMEG_1524	rpoA	DNA-directed RNA polymerase subunit alpha	10	3.3	6.5	0.99	65.4	129.87	3.2	0.48	1
MSMEG_1525	-	50S ribosomal protein L17	3	0	5	2.59	0	30.14	5	1	1
MSMEG_1526c	-	cutinase	6	296.2	293.4	-0.01	3554.7	3521.01	-2.8	1	1
MSMEG_1527	truA	tRNA pseudouridine synthase A	10	42.9	22.2	-0.95	858.7	444.33	-20.7	0.31	1
MSMEG_1528c	-	cutinase	10	83.6	55.8	-0.58	1672.5	1116.58	-27.8	0.54	1
MSMEG_1529c	-	serine esterase, cutinase family protein	6	157.9	96.2	-0.71	1894.6	1154.86	-61.6	0.37	1
MSMEG_1530c	-	integral membrane protein	10	258.9	156.2	-0.73	5178.5	3124.14	-102.7	0.25	1
MSMEG_1531	-	hypothetical protein MSMEG_1531	3	174.9	85	-1.04	1049.5	509.78	-89.9	0.39	1
MSMEG_1532c	-	antibiotic biosynthesis monooxygenase	3	171.2	66.3	-1.37	1027.4	398.02	-104.9	0.27	1
MSMEG_1533c	-	subtilase family protein	9	28.7	30.6	0.09	515.8	550.92	1.9	0.93	1
MSMEG_1534	-	hypothetical protein MSMEG_1534	10	41	26.1	-0.65	819.9	521.29	-14.9	0.56	1
MSMEG_1535c	-	hypothetical protein MSMEG_1535	12	25.6	104.9	2.04	614.1	2518.65	79.4	0.1	1
MSMEG_1536	-	ftsk/SpoIIIE family protein	29	94.7	62.6	-0.6	5494.1	3630.69	-32.1	0.32	1
MSMEG_1537	-	hypothetical protein MSMEG_1537	8	14.8	33.3	1.17	237.4	532.55	18.4	0.24	1
MSMEG_1538	-	hypothetical protein MSMEG_1538	0	0	0	0	0	0	0	1	1
MSMEG_1539	-	hypothetical protein MSMEG_1539	3	52.5	20.2	-1.38	315	121.07	-32.3	0.52	1
MSMEG_1540c	-	ATP-dependent RNA helicase	4	222.9	167.1	-0.42	1783	1336.47	-55.8	0.72	1
MSMEG_1541	-	hypothetical protein MSMEG_1541	2	92	51.2	-0.84	367.9	204.89	-40.8	0.63	1
MSMEG_1542	-	transcriptional regulator	6	159.7	74.1	-1.11	1916.9	889.43	-85.6	0.26	1
MSMEG_1543	-	eptc-inducible aldehyde dehydrogenase	20	135.6	298.8	1.14	5424.3	11951.4	163.2	0.18	1
MSMEG_1544	-	PduO protein	1	160	71	-1.17	320	141.9	-89.1	0.67	1
MSMEG_1545c	-	hypothetical protein MSMEG_1545	5	65.6	101.5	0.63	656	1015.04	35.9	0.68	1
MSMEG_1546	-	coenzyme B12-dependent glycerol dehydrogenase small subunit	4	22.3	89.4	2.01	178.1	715.58	67.2	0.31	1
MSMEG_1547	-	glycerol dehydratase large subunit	11	119.9	185.8	0.63	2637.7	4088.49	65.9	0.9	1
MSMEG_1548	-	propanediol utilization: dehydratase, medium subunit	3	8.5	10.1	0.25	50.8	60.54	1.6	0.81	1
MSMEG_1550	-	PduH protein	2	10.7	7	-0.61	42.7	27.94	-3.7	1	1
MSMEG_1551c	-	hypothetical protein MSMEG_1551	2	55.2	37.3	-0.57	220.8	149.01	-18	1	1
MSMEG_1552	eat	ethanolamine permease	18	146.6	184.6	0.33	5276.8	6644.63	38	0.6	1
MSMEG_1553	eutB	ethanolamine ammonia-lyase, large subunit	12	177.7	113.8	-0.64	4264.7	2731.16	-63.9	0.25	1
MSMEG_1554	eutC	ethanolamine ammonia-lyase small subunit	4	148	91.9	-0.69	1184	735.24	-56.1	0.51	1
MSMEG_1556	rplM	50S ribosomal protein L13	6	0.3	5	3.9	4	60.28	4.7	0.46	1
MSMEG_1557	rpsI	ribosomal protein S9	5	0	0.5	0.55	0	4.66	0.5	1	1
MSMEG_1558	-	hypothetical protein MSMEG_1558	0	0	0	0	0	0	0	1	1
MSMEG_1559	glmM	phosphoglucosamine mutase	7	0.3	0	-0.37	4	0	-0.3	1	1
MSMEG_1560	-	hypothetical protein MSMEG_1560	4	31.8	15.1	-1.07	254.6	121.07	-16.7	0.2	1
MSMEG_1561c	-	LysR-family protein trancsriptional regulator	8	35.7	58.2	0.71	570.9	930.96	22.5	0.93	1
MSMEG_1563	-	short-chain dehydrogenase/reductase SDR	11	67.7	30.6	-1.15	1489.1	672.76	-37.1	0.067	1
MSMEG_1564c	-	lignostilbene-alpha,beta-dioxygenase	25	66.1	67.3	0.03	3307.1	3367.2	1.2	0.98	1
MSMEG_1565	-	transcriptional regulator, TetR family protein	5	36.6	57.5	0.65	366.1	574.97	20.9	0.95	1
MSMEG_1566c	-	oxidoreductase	20	77	58.6	-0.39	3078.4	2345.17	-18.3	0.47	1
MSMEG_1567c	-	hypothetical protein MSMEG_1567	6	175.6	211.6	0.27	2107.5	2539.2	36	0.72	1
MSMEG_1568	glmS	D-fructose-6-phosphate amidotransferase	22	0	2.1	1.61	0	90.42	2.1	0.25	1
MSMEG_1569c	-	hypothetical protein MSMEG_1569	2	0	10.5	3.52	0	41.91	10.5	0.46	1
MSMEG_1570	-	carboxylesterase	9	37.3	77.6	1.06	670.7	1397.54	40.4	0.72	1
MSMEG_1571c	-	integral membrane protein	10	155.1	86	-0.85	3102.5	1720	-69.1	0.39	1
MSMEG_1572	-	transcriptional regulator, GntR family protein	15	28.4	21.4	-0.41	850.8	642.37	-6.9	0.71	1
MSMEG_1573	-	carbohydrate kinase family protein	12	150.6	203.3	0.43	3613.7	4879.21	52.7	0.49	1
MSMEG_1574	-	glutamate decarboxylase	15	197.6	233.4	0.24	5928.7	7001.39	35.8	0.81	1
MSMEG_1575	alr	alanine racemase	12	0.2	0	-0.22	4	0	-0.2	1	1
MSMEG_1576	-	alpha/beta hydrolase fold	9	96.7	53.6	-0.85	1739.8	964.59	-43.1	0.3	1
MSMEG_1577	-	hypothetical protein MSMEG_1577	2	88.3	143.4	0.7	353	573.43	55.1	0.72	1
MSMEG_1578	-	peptidase M22, glycoprotease	7	42.4	25.4	-0.74	593.2	356.11	-16.9	0.51	1
MSMEG_1579	rimI	ribosomal-protein-alanine acetyltransferase	10	88.6	62.8	-0.5	1772.7	1256.53	-25.8	0.39	1
MSMEG_1580	-	O-sialoglycoprotein endopeptidase	8	75.2	161.9	1.11	1203.3	2590.7	86.7	0.37	1
MSMEG_1581	-	hypothetical protein MSMEG_1581	5	199.3	218.3	0.13	1993.4	2182.97	19	0.93	1
MSMEG_1582	groES	co-chaperonin GroES	4	0.5	0	-0.59	4	0	-0.5	1	1
MSMEG_1583	groEL	chaperonin GroEL	4	89.5	53.6	-0.74	716.3	428.42	-36	0.35	1
MSMEG_1584	-	hypothetical protein MSMEG_1584	9	162.2	55.9	-1.54	2920.3	1005.59	-106.4	0.056	1
MSMEG_1585	-	cupin domain-containing protein	8	78	61.1	-0.35	1247.4	977.91	-16.8	0.75	1
MSMEG_1586c	-	beta-lactamase	11	175.2	124.2	-0.5	3853.5	2733.49	-50.9	0.41	1
MSMEG_1587c	-	alpha/beta hydrolase fold	8	194.1	116.9	-0.73	3106.1	1869.67	-77.3	0.55	1
MSMEG_1588	-	hypothetical protein MSMEG_1588	4	232	86.9	-1.42	1855.9	695.53	-145	0.21	1
MSMEG_1589c	-	hypothetical protein MSMEG_1589	4	100.2	8.1	-3.62	801.7	65.19	-92.1	0.028	1
MSMEG_1590	-	hypothetical protein MSMEG_1590	1	0	53.6	5.77	0	107.1	53.6	1	1
MSMEG_1591	-	TnpC protein	18	143.8	112.1	-0.36	5175.2	4035.56	-31.7	0.41	1
MSMEG_1592	-	hypothetical protein MSMEG_1592	11	107.5	199.1	0.89	2364.5	4379.66	91.6	0.65	1
MSMEG_1593c	-	hypothetical protein MSMEG_1593	2	25.4	19.8	-0.36	101.4	79.16	-5.6	0.85	1
MSMEG_1594	-	enoyl-CoA hydratase	4	203.5	787.7	1.95	1627.7	6301.23	584.2	0.87	1
MSMEG_1595c	-	putative oxidoreductase	4	202.3	87.3	-1.21	1618.4	698.5	-115	0.081	1
MSMEG_1596	-	transcriptional regulator	5	87.1	305.8	1.81	871.1	3058.45	218.7	0.57	1
MSMEG_1597c	-	transcription factor WhiB	2	0	0	0	0	0	0	1	1
MSMEG_1598	-	hypothetical protein MSMEG_1598	12	207.2	91.6	-1.18	4972.1	2198.87	-115.6	0.1	1
MSMEG_1599	-	RNA polymerase sigma factor SigD	5	122.4	51.2	-1.26	1224	512.24	-71.2	0.124	1
MSMEG_1600	-	hypothetical protein MSMEG_1600	8	261	138.4	-0.92	4176.3	2214.4	-122.6	0.55	1
MSMEG_1601c	-	hypothetical protein MSMEG_1601	9	207	212.3	0.04	3725.2	3821.89	5.4	0.95	1
MSMEG_1602	guaB	inositol-5-monophosphate dehydrogenase	11	53.6	39	-0.46	1179.2	858.77	-14.6	0.84	1
MSMEG_1603	-	inositol-5-monophosphate dehydrogenase	11	163	144	-0.18	3585.7	3168.78	-19	0.8	1
MSMEG_1604	-	FAD dependent oxidoreductase	19	242.2	214.5	-0.18	9202.3	8150.96	-27.7	0.75	1
MSMEG_1605	phoU	phosphate transport system regulatory protein PhoU	4	140.2	126.4	-0.15	1121.4	1011.15	-13.8	0.77	1
MSMEG_1606	-	benzoylformate decarboxylase	20	25.5	58.4	1.2	1018.8	2336.64	32.9	0.39	1
MSMEG_1607	-	putative tautomerase	3	127.2	19.4	-2.71	763.3	116.42	-107.8	0.048	1
MSMEG_1608c	-	glycosyl transferase	31	88.2	82.2	-0.1	5465.4	5096.53	-5.9	0.89	1
MSMEG_1610	guaA	bifunctional GMP synthase/glutamine amidotransferase protein	11	0.2	2.7	3.9	4	60.28	2.6	0.51	1
MSMEG_1611	-	transcriptional regulator, TetR family protein, putative	5	65.9	212.1	1.69	658.9	2121.15	146.2	0.25	1
MSMEG_1612	-	extracellular solute-binding protein, family protein 3	11	71.9	72.4	0.01	1582.5	1592.33	0.4	0.97	1
MSMEG_1613	-	ABC polar amino acid transporter, inner membrane subunit	6	62.7	143.3	1.19	752.9	1719.62	80.6	0.17	1
MSMEG_1614	-	glutamine transport ATP-binding protein GlnQ	1	0	79.2	6.32	0	158.33	79.2	1	1
MSMEG_1615	ggt	gamma-glutamyltranspeptidase	7	68.1	20	-1.77	953.8	279.4	-48.2	0.17	1
MSMEG_1617c	-	kumamolisin	17	146.9	201.3	0.45	4995.8	6844.75	54.4	0.57	1
MSMEG_1618c	-	hypothetical protein MSMEG_1618	1	0	48.8	5.64	0	97.53	48.8	0.33	1
MSMEG_1619	-	hypothetical protein MSMEG_1619	2	0	7.5	3.09	0	30.14	7.5	1	1
MSMEG_1620	-	hypothetical protein MSMEG_1620	4	39.5	19.8	-1	315.7	158.33	-19.7	0.55	1
MSMEG_1621c	-	pyrimidine-specific ribonucleoside hydrolase RihA	5	65.3	70.5	0.11	652.9	705.24	5.2	0.91	1
MSMEG_1622	-	putative DNA repair polymerase	9	74.8	46.6	-0.68	1345.9	839.37	-28.1	0.47	1
MSMEG_1623c	-	short chain dehydrogenase	24	85.3	73.2	-0.22	4094.4	3514.92	-12.1	0.54	1
MSMEG_1624	-	universal stress protein family protein	4	51.8	24.1	-1.1	414.7	193.12	-27.7	0.51	1
MSMEG_1625	-	amino acid transporter, putative	21	104.8	165.2	0.66	4400.7	6938.28	60.4	0.38	1
MSMEG_1626c	-	putative DNA-binding protein	8	45.9	119.1	1.38	734.2	1906.03	73.2	0.52	1
MSMEG_1627c	-	hypothetical protein MSMEG_1627	0	0	0	0	0	0	0	1	1
MSMEG_1628	-	oxidoreductase, short chain dehydrogenase/reductase family protein	9	65.5	39.7	-0.72	1179.3	714.16	-25.8	0.31	1
MSMEG_1629c	-	hypothetical protein MSMEG_1629	9	212.2	92.1	-1.2	3819.6	1658.69	-120.1	0.02	1
MSMEG_1630c	-	2,5-dichloro-2,5-cyclohexadiene-1,4-diol dehydrogenase	6	501.2	281.6	-0.83	6014.4	3379.49	-219.6	0.33	1
MSMEG_1631	-	DNA-binding protein	7	184.1	300.4	0.71	2576.7	4205.3	116.3	0.79	1
MSMEG_1632c	-	hypothetical protein MSMEG_1632	3	32.8	15.1	-1.12	196.5	90.42	-17.7	0.67	1
MSMEG_1633	dnaE2	error-prone DNA polymerase	28	68.1	34.9	-0.97	3816.4	1952.58	-33.3	0.055	1
MSMEG_1634	-	forkhead-associated protein	3	75.8	81.9	0.11	454.7	491.15	6.1	0.9	1
MSMEG_1635	-	nitroreductase family protein	5	132.9	93.8	-0.5	1328.9	938.2	-39.1	0.5	1
MSMEG_1636c	-	RNA methyltransferase, TrmH family protein, group 2	7	238.5	191.4	-0.32	3338.4	2680.07	-47	0.68	1
MSMEG_1637	-	periplasmic sensor signal transduction histidine kinase	17	287.2	263.5	-0.12	9765.7	8958.11	-23.8	0.85	1
MSMEG_1638	-	roadblock/LC7 domain-contain protein	3	192	388.6	1.02	1152	2331.61	196.6	0.85	1
MSMEG_1639	-	hypothetical protein MSMEG_1639	9	232.8	241.1	0.05	4190.4	4339.93	8.3	0.95	1
MSMEG_1640	-	ATP/GTP-binding protein	5	118.7	120.6	0.02	1186.7	1206.22	2	0.99	1
MSMEG_1641	-	hypothetical protein MSMEG_1641	6	139.4	261.6	0.91	1672.5	3139.29	122.2	0.83	1
MSMEG_1642c	-	ABC transporter, ATP-binding protein	26	163.5	211.3	0.37	8501.3	10987.3	47.8	0.66	1
MSMEG_1643	-	hypothetical protein MSMEG_1643	22	220.6	263.9	0.26	9705.9	11610.1	43.3	0.51	1
MSMEG_1644c	-	hypothetical protein MSMEG_1644	11	154.3	171.4	0.15	3394.3	3771.69	17.2	0.82	1
MSMEG_1645c	-	NADH:flavin oxidoreductase/NADH oxidase	11	273.2	254.1	-0.1	6010.1	5590.28	-19.1	0.85	1
MSMEG_1646c	-	ribosomal RNA adenine dimethylase family protein	9	12.7	5.4	-1.22	228.5	97.79	-7.3	0.52	1
MSMEG_1647	-	tetrahydrofolate dehydrogenase/cyclohydrolase FolD	3	22.9	12.4	-0.88	137.2	74.51	-10.4	0.49	1
MSMEG_1648	-	putative transcriptional regulator	9	106.9	104.4	-0.03	1923.9	1879.5	-2.5	0.95	1
MSMEG_1649	-	FAD dependent oxidoreductase	15	107.1	73	-0.55	3213.6	2191.38	-34.1	0.38	1
MSMEG_1650c	-	methyltransferase type 11	5	81.5	129.9	0.67	815.3	1298.84	48.4	0.44	1
MSMEG_1651c	metX	homoserine O-acetyltransferase	10	118.5	95.7	-0.31	2369.7	1913.78	-22.8	0.61	1
MSMEG_1652c	-	O-acetylhomoserine aminocarboxypropyltransferase	15	276.3	224.3	-0.3	8288.7	6728.19	-52	0.46	1
MSMEG_1653c	-	hypothetical protein MSMEG_1653	1	157.6	88.5	-0.83	315.3	176.95	-69.2	1	1
MSMEG_1654	-	isocitrate dehydrogenase, NADP-dependent	26	36.3	169	2.22	1888.9	8787.29	132.7	0.019	1
MSMEG_1655c	-	hydrolase, alpha/beta fold family protein, putative	7	89.9	50.2	-0.84	1259.3	703.16	-39.7	0.2	1
MSMEG_1656	xth	exodeoxyribonuclease III	4	85.7	317.8	1.89	685.4	2542.71	232.2	0.062	1
MSMEG_1657	trpS	tryptophanyl-tRNA synthetase	12	0	0	0	0	0	0	1	1
MSMEG_1658	-	ribonuclease, putative	8	131.1	376.1	1.52	2098.2	6017.42	245	0.58	1
MSMEG_1659c	-	multidrug resistance protein, SMR family protein	2	361.3	730.5	1.02	1445.1	2922.11	369.2	0.66	1
MSMEG_1660	-	oxidoreductase, 2-nitropropane dioxygenase family protein	3	14.8	2.3	-2.67	89.1	13.97	-12.5	1	1
MSMEG_1661c	-	D-alanyl-D-alanine carboxypeptidase	14	50.8	30.7	-0.73	1423.2	859.03	-20.1	0.25	1
MSMEG_1662c	-	hypothetical protein MSMEG_1662	18	65.3	52.2	-0.32	2352	1880.02	-13.1	0.56	1
MSMEG_1663c	-	transcriptional regulator, AsnC family protein	8	90.2	16.3	-2.47	1443.1	260.77	-73.9	0.075	1
MSMEG_1664c	-	hypothetical protein MSMEG_1664	6	2	8.5	2.08	24.3	102.45	6.5	0.62	1
MSMEG_1665	-	gamma-aminobutyraldehyde dehydrogenase	13	112.7	220.9	0.97	2929.7	5742.8	108.2	0.67	1
MSMEG_1666	-	RNA polymerase sigma factor SigJ	8	189.1	274.1	0.54	3025	4385.6	85	0.58	1
MSMEG_1668	-	pyridoxamine 5'-phosphate oxidase family protein	3	244.3	134.3	-0.86	1465.6	805.61	-110	0.41	1
MSMEG_1669c	sdhB	succinate dehydrogenase iron-sulfur subunit	9	0.4	0	-0.54	8.1	0	-0.4	0.44	1
MSMEG_1670c	sdhA	succinate dehydrogenase flavoprotein subunit	26	0.4	2.3	2.57	20.2	120.56	1.9	0.22	1
MSMEG_1671c	-	succinate dehydrogenase hydrophobic membrane anchor protein SdhD	8	6.5	5.2	-0.31	103.9	83.82	-1.3	0.91	1
MSMEG_1672c	sdhC	succinate dehydrogenase, cytochrome b556 subunit	9	0	0	0	0	0	0	1	1
MSMEG_1673	cdd	cytidine deaminase	4	28.3	20.9	-0.44	226.4	167.38	-7.4	0.95	1
MSMEG_1674c	-	hypothetical protein MSMEG_1674	2	39	48.9	0.33	156	195.58	9.9	1	1
MSMEG_1675	deoA	thymidine phosphorylase	4	257.3	234.9	-0.13	2058.1	1879.12	-22.4	0.9	1
MSMEG_1676	add	adenosine deaminase	9	149.6	82.4	-0.86	2693.5	1482.51	-67.3	0.21	1
MSMEG_1677c	aspA	aspartate ammonia-lyase	16	103.6	191.6	0.89	3315.7	6131.24	88	0.3	1
MSMEG_1678	-	transcriptional regulator, LysR family protein	16	194	127.2	-0.61	6207	4068.93	-66.8	0.12	1
MSMEG_1679c	-	AmiB	15	65.6	39	-0.75	1967.6	1171.03	-26.6	0.44	1
MSMEG_1680c	-	hypothetical protein MSMEG_1680	5	46.1	95.2	1.05	461	952.3	49.1	0.53	1
MSMEG_1681c	-	endoribonuclease L-PSP superfamily protein	6	107.8	88.4	-0.29	1293.5	1061.21	-19.4	0.66	1
MSMEG_1682c	-	flavin-containing monooxygenase FMO	18	76	50	-0.6	2736.2	1799.05	-26	0.23	1
MSMEG_1683c	-	cytosine/purine/uracil/thiamine/allantoin permease family protein	20	165.9	85.3	-0.96	6634.8	3413.49	-80.5	0.017	1
MSMEG_1684c	-	hypothetical protein MSMEG_1684	10	186.6	250.3	0.42	3731.6	5006.25	63.7	0.56	1
MSMEG_1685c	-	hypothetical protein MSMEG_1685	0	0	0	0	0	0	0	1	1
MSMEG_1686c	-	NPL/P60-family protein secreted protein	5	40.8	10.2	-1.99	408.3	102.45	-30.6	0.19	1
MSMEG_1687c	-	hypothetical protein MSMEG_1687	2	12.8	9.3	-0.46	51.3	37.25	-3.5	1	1
MSMEG_1688c	-	cupin domain-containing protein	2	1.1	32.6	4.93	4.3	130.39	31.5	0.5	1
MSMEG_1689c	-	3-oxoacyl-	5	12.8	42.5	1.73	127.9	425.18	29.7	0.26	1
MSMEG_1690c	-	putative ECF sigma factor RpoE1	5	67	17.2	-1.96	670	172.3	-49.8	0.16	1
MSMEG_1691c	-	transcriptional regulatory protein	17	59.3	78.6	0.41	2016.5	2672.06	19.3	0.83	1
MSMEG_1692	-	ECF-family protein RNA polymerase sigma factor	7	124.8	75.2	-0.73	1746.9	1052.41	-49.6	0.28	1
MSMEG_1693c	-	succinate dehydrogenase	18	52.6	75.7	0.53	1893.5	2725.35	23.1	0.47	1
MSMEG_1694	upp	uracil phosphoribosyltransferase	4	277.7	298.1	0.1	2221.6	2384.89	20.4	0.97	1
MSMEG_1695c	-	phosphoglucomutase/phosphomannomutase	8	94.9	55.9	-0.77	1519.1	893.83	-39.1	0.29	1
MSMEG_1696c	-	regulatory protein, MarR	2	442.2	79.1	-2.48	1768.9	316.4	-363.1	0.42	1
MSMEG_1697c	-	hypothetical protein MSMEG_1697	7	153.5	150.7	-0.03	2149.2	2109.89	-2.8	0.98	1
MSMEG_1698	-	putative ammonia monooxygenase superfamily protein	8	84	206.6	1.3	1343.7	3304.99	122.6	0.12	1
MSMEG_1699c	-	pentachlorophenol 4-monooxygenase	9	47.7	47.7	0	859	858.91	0	1	1
MSMEG_1700	-	TetR-family protein transcriptional regulator	4	27	35.8	0.41	215.6	286.26	8.8	0.68	1
MSMEG_1701c	-	purine nucleoside phosphorylase	10	200.9	126.8	-0.66	4018.7	2536.23	-74.1	0.49	1
MSMEG_1702	-	amidohydrolase	7	168.8	88.3	-0.93	2363.6	1236.88	-80.5	0.13	1
MSMEG_1703	-	amidohydrolase	5	94.1	38.9	-1.28	941.3	388.71	-55.3	0.086	1
MSMEG_1704	-	ABC transporter	17	45	39	-0.21	1531.4	1324.44	-6.1	0.75	1
MSMEG_1705	-	D-xylose transport ATP-binding protein XylG	14	11.6	15	0.37	324.7	419.1	3.4	0.64	1
MSMEG_1706	-	xylose transport system permease protein XylH	12	45.7	246.9	2.43	1096.7	5924.42	201.2	0.13	1
MSMEG_1707c	-	phosphatase YfbT	1	85	80	-0.09	170.1	160.01	-5	1	1
MSMEG_1708c	-	ribose operon repressor, putative	7	25.3	18.8	-0.43	354.1	262.97	-6.5	0.63	1
MSMEG_1709c	-	inner membrane ABC transporter permease protein YjfF	14	159.3	225	0.5	4459.9	6300.57	65.7	0.74	1
MSMEG_1710c	-	ribose transport system permease protein RbsC	9	54.3	172.8	1.67	978.1	3110.84	118.5	0.88	1
MSMEG_1711c	-	ATP binding protein of ABC transporter	9	8.2	112.9	3.79	147.3	2031.38	104.7	0.43	1
MSMEG_1712c	-	ABC transporter periplasmic-binding protein YtfQ	5	43.1	27.5	-0.65	430.6	274.75	-15.6	0.57	1
MSMEG_1713	araB	ribulokinase	17	49.4	28.2	-0.81	1681.1	959.02	-21.2	0.16	1
MSMEG_1714	-	L-ribulose-5-phosphate 4-epimerase	8	54.3	36.1	-0.59	869.6	577.17	-18.3	0.46	1
MSMEG_1715	araA	L-arabinose isomerase	11	64.9	55	-0.24	1427.7	1210.88	-9.9	0.67	1
MSMEG_1716	-	IS3 family protein element, transposase orfA	3	0	0	0	0	0	0	1	1
MSMEG_1717c	-	ISMsm8, transposase	20	95	81.9	-0.21	3799.1	3274.07	-13.1	0.71	1
MSMEG_1720	-	IS1137, transposase orfA	1	19.2	23.3	0.28	38.4	46.57	4.1	1	1
MSMEG_1721	-	IS1137, transposase orfB	24	88.5	81.5	-0.12	4248	3913.46	-7	0.78	1
MSMEG_1722c	-	hypothetical protein MSMEG_1722	9	117.2	208.7	0.83	2110.3	3756.69	91.5	0.56	1
MSMEG_1723	-	hypothetical protein MSMEG_1723	5	110.3	65.3	-0.76	1103	653.36	-45	0.41	1
MSMEG_1724c	-	hypothetical protein MSMEG_1724	6	174.1	274.7	0.66	2088.9	3296.2	100.6	0.83	1
MSMEG_1725	-	putative transposase	6	173.3	295.6	0.77	2079.4	3547.52	122.3	0.29	1
MSMEG_1726	-	transposase	16	247.5	181.7	-0.45	7918.4	5812.87	-65.8	0.14	1
MSMEG_1728	-	ISMsm1, transposase orfA	3	179	121.4	-0.56	1073.9	728.13	-57.6	0.76	1
MSMEG_1730	-	ISMsm1, transposase orfB	17	175.7	130.4	-0.43	5975	4434.37	-45.3	0.31	1
MSMEG_1731c	-	IS6120, transposase	19	156.8	113.9	-0.46	5958	4328.03	-42.9	0.27	1
MSMEG_1732	-	transposase IS116/IS110/IS902	28	160.8	173.9	0.11	9002.9	9737.62	13.1	0.86	1
MSMEG_1733	-	hypothetical protein MSMEG_1733	6	99.2	43.5	-1.19	1190.7	521.55	-55.8	0.26	1
MSMEG_1734c	-	hypothetical protein MSMEG_1734	6	301.4	168.2	-0.84	3617.2	2018.94	-133.2	0.18	1
MSMEG_1735	-	flavoprotein disulfide reductase	11	174.4	101.1	-0.79	3837.9	2223.97	-73.4	0.16	1
MSMEG_1736	-	glycerol-3-phosphate dehydrogenase 2	20	121.8	231	0.92	4871.6	9241.05	109.2	0.45	1
MSMEG_1737	-	RNA pseudouridine synthase family protein	9	276.1	254.8	-0.12	4970.4	4585.71	-21.4	0.77	1
MSMEG_1738c	-	transmembrane protein	4	292.3	40.7	-2.84	2338.3	325.97	-251.5	0.027	1
MSMEG_1739c	-	enoyl-CoA hydratase/isomerase family protein	8	140.8	69.3	-1.02	2253	1109.2	-71.5	0.32	1
MSMEG_1740	-	dehydrogenase/reductase SDR family protein member 4	8	285.1	387.1	0.44	4561.1	6193.21	102	0.5	1
MSMEG_1741c	-	TetR-family protein transcriptional regulator	7	60	362	2.59	840.2	5067.97	302	0.43	1
MSMEG_1742	-	oxidoreductase	12	115.9	103.5	-0.16	2780.7	2485.14	-12.3	0.83	1
MSMEG_1743	-	Fatty acid desaturase	19	127.6	198.7	0.64	4849	7549.87	71.1	0.33	1
MSMEG_1744c	-	hypothetical protein MSMEG_1744	12	85.5	49.5	-0.79	2053	1188.63	-36	0.19	1
MSMEG_1745c	-	transcriptional regulator	10	86.4	107.4	0.31	1728.9	2147.92	21	0.71	1
MSMEG_1746	-	6-hydroxy-D-nicotine oxidase	11	111.8	112.3	0.01	2459	2471.31	0.6	1	1
MSMEG_1747	-	RNA polymerase sigma-70 factor	10	20.7	59.4	1.52	414.2	1187.34	38.7	0.23	1
MSMEG_1748	-	hypothetical protein MSMEG_1748	6	27.6	5.8	-2.24	331.1	69.85	-21.8	0.21	1
MSMEG_1749c	-	putative monooxygenase	10	156.8	57.7	-1.44	3136.8	1153.83	-99.1	0.097	1
MSMEG_1750	-	hypothetical protein MSMEG_1750	4	0	12.2	3.73	0	97.79	12.2	0.45	1
MSMEG_1751c	-	norsolorinic acid reductase	19	144.3	175	0.28	5481.6	6650.59	30.8	0.8	1
MSMEG_1752c	-	hypothetical protein MSMEG_1752	1	166.4	46.6	-1.84	332.8	93.13	-119.8	0.7	1
MSMEG_1753	mtnN	MTA/SAH nucleosidase	4	46.9	154.5	1.72	375.1	1235.98	107.6	0.52	1
MSMEG_1754	-	hypothetical protein MSMEG_1754	4	247.4	133.8	-0.89	1979.4	1070.52	-113.6	0.29	1
MSMEG_1755c	-	anti-sigm factor, ChrR	5	157.5	207.7	0.4	1574.6	2076.9	50.2	0.77	1
MSMEG_1756c	-	endonuclease VIII and DNA n-glycosylase with an AP lyase activity	6	248.8	158.4	-0.65	2986	1901.37	-90.4	0.59	1
MSMEG_1757c	-	DEAD/DEAH box helicase	30	102.9	112.3	0.13	6174.1	6740.1	9.4	0.82	1
MSMEG_1758c	-	hypothetical protein MSMEG_1758	0	0	0	0	0	0	0	1	1
MSMEG_1759	-	hypothetical protein MSMEG_1759	7	328.1	196.9	-0.74	4592.8	2756.64	-131.2	0.15	1
MSMEG_1760c	-	short-chain dehydrogenase/reductase SDR	10	142.7	110.6	-0.37	2853.1	2212.58	-32	0.48	1
MSMEG_1761	-	integral membrane protein	21	232.3	428.3	0.88	9758.2	17989	196	0.16	1
MSMEG_1762c	-	piperideine-6-carboxylic acid dehydrogenase	8	204.9	195.8	-0.07	3278.6	3133.59	-9.1	0.96	1
MSMEG_1763	-	leucine-responsive regulatory protein	6	428.9	403.1	-0.09	5147.2	4837.3	-25.8	0.92	1
MSMEG_1764	-	L-lysine aminotransferase	5	385.8	828.6	1.1	3858	8286.29	442.8	0.37	1
MSMEG_1765c	-	restriction endonuclease family protein	2	128.1	441	1.78	512.2	1763.87	312.9	0.42	1
MSMEG_1766	-	hypothetical protein MSMEG_1766	1	69.8	2241	5	139.6	4482	2171.2	0.72	1
MSMEG_1767	-	hypothetical protein MSMEG_1767	3	75.4	63.6	-0.24	452.4	381.85	-11.8	0.88	1
MSMEG_1768	-	hypothetical protein MSMEG_1768	7	130.4	70.8	-0.88	1825.2	991.62	-59.5	0.4	1
MSMEG_1769	-	UsfY protein	2	327.5	1.2	-8.14	1310	4.66	-326.3	0.45	1
MSMEG_1770c	-	hypothetical protein MSMEG_1770	0	0	0	0	0	0	0	1	1
MSMEG_1771	-	methylase, putative	6	161.5	72	-1.16	1937.8	864.34	-89.5	0.24	1
MSMEG_1772	-	hypothetical protein MSMEG_1772	3	208.8	65.2	-1.68	1253	391.16	-143.6	0.15	1
MSMEG_1773c	-	hypothetical protein MSMEG_1773	15	246.2	293.1	0.25	7387.3	8794.25	46.9	0.71	1
MSMEG_1774c	-	hypothetical protein MSMEG_1774	5	251	120.7	-1.06	2509.8	1206.74	-130.3	0.141	1
MSMEG_1775	-	cytochrome P450 monooxygenase	9	75.4	50.8	-0.57	1356.6	914.65	-24.6	0.28	1
MSMEG_1776c	-	ribonuclease Z	13	65.8	21.6	-1.61	1710.7	560.74	-44.2	0.28	1
MSMEG_1777	-	UsfY protein	0	0	0	0	0	0	0	1	1
MSMEG_1778c	-	hypothetical protein MSMEG_1778	3	244.8	253.1	0.05	1468.9	1518.61	8.3	0.98	1
MSMEG_1779c	-	hypothetical protein MSMEG_1779	3	59.1	29.4	-1.01	354.9	176.7	-29.7	0.33	1
MSMEG_1780c	-	hypothetical protein MSMEG_1780	16	169.8	97.9	-0.8	5434.2	3131.51	-72	0.16	1
MSMEG_1781c	-	hypothetical protein MSMEG_1781	4	122	163.1	0.42	976	1305.18	41.1	0.8	1
MSMEG_1782c	-	oxidoreductase, short chain dehydrogenase/reductase family protein	15	208	138.3	-0.59	6239.9	4148.61	-69.7	0.17	1
MSMEG_1783c	-	hypothetical protein MSMEG_1783	3	118	29.8	-1.98	708.2	178.9	-88.2	0.033	1
MSMEG_1784c	-	type I topoisomerase	17	134.3	86.4	-0.64	4564.7	2939.3	-47.8	0.22	1
MSMEG_1785	-	hypothetical protein MSMEG_1785	19	127.4	79.4	-0.68	4841.1	3018.46	-48	0.26	1
MSMEG_1786c	-	STAS domain-containing protein	3	499.5	251.7	-0.99	2997	1510.45	-247.8	0.15	1
MSMEG_1787	-	RsbW protein	4	111.9	101.7	-0.14	895.5	813.37	-10.3	0.92	1
MSMEG_1788	-	hypothetical protein MSMEG_1788	3	75	83.7	0.16	449.9	502.15	8.7	0.93	1
MSMEG_1789	-	hypothetical protein MSMEG_1789	2	487.1	162.4	-1.58	1948.4	649.48	-324.7	0.2	1
MSMEG_1790	-	hypothetical protein MSMEG_1790	3	120.2	100.6	-0.26	721.1	603.57	-19.6	0.8	1
MSMEG_1791	-	UsfY protein	2	0	0	0	0	0	0	1	1
MSMEG_1792c	-	hypothetical protein MSMEG_1792	3	134.9	81.5	-0.73	809.7	488.95	-53.5	0.35	1
MSMEG_1793c	-	membrane protein	3	81	128.8	0.67	485.9	772.89	47.8	0.88	1
MSMEG_1794	-	dehydrogenase	11	187.6	212.4	0.18	4128.1	4673.03	24.8	0.91	1
MSMEG_1795c	-	2-deoxy-scyllo-inosamine dehydrogenase	9	139.2	168.8	0.28	2505.5	3039.29	29.7	0.74	1
MSMEG_1796c	-	membrane protein	16	359.5	410.4	0.19	11505.4	13134.2	50.9	0.75	1
MSMEG_1797c	-	salicylate esterase	6	134.2	139.3	0.05	1610.2	1672.03	5.2	0.97	1
MSMEG_1798c	-	major facilitator superfamily protein	23	246.5	245.3	-0.01	11340.4	11285.2	-1.2	1	1
MSMEG_1799	-	transcriptional regulator	6	184.8	255.4	0.47	2217.5	3064.39	70.6	0.57	1
MSMEG_1800c	-	hypothetical protein MSMEG_1800	1	0	0	0	0	0	0	1	1
MSMEG_1801	-	hypothetical protein MSMEG_1801	1	83	254.6	1.62	165.9	509.26	171.7	0.77	1
MSMEG_1802	-	ChaB protein	5	203.2	76.3	-1.41	2031.6	762.67	-126.9	0.67	1
MSMEG_1803	-	RsbW protein	3	89.6	41.9	-1.1	537.4	251.46	-47.7	0.36	1
MSMEG_1804	-	RNA polymerase sigma factor SigF	3	420.8	188.9	-1.16	2525.1	1133.52	-231.9	0.13	1
MSMEG_1805c	-	hypothetical protein MSMEG_1805	3	137.3	369.2	1.43	824.1	2215.19	231.9	0.84	1
MSMEG_1806	-	hypothetical protein MSMEG_1806	5	35	91	1.38	350.1	910.39	56	0.38	1
MSMEG_1807c	-	acetyl-/propionyl-coenzyme A carboxylase alpha chain	10	0.4	0	-0.49	8.1	0	-0.4	1	1
MSMEG_1808c	-	Fe-S metabolism associated SufE	4	234.6	252.6	0.11	1877.2	2020.5	17.9	0.86	1
MSMEG_1809c	-	putative thiosulfate sulfurtransferase	12	205.8	258.4	0.33	4940	6201.72	52.6	0.42	1
MSMEG_1810c	-	hypothetical protein MSMEG_1810	2	298.4	481.9	0.69	1193.7	1927.76	183.5	0.84	1
MSMEG_1811c	maf	Maf-like protein	3	52.1	48.5	-0.1	312.8	290.91	-3.6	0.96	1
MSMEG_1812c	-	hypothetical protein MSMEG_1812	1	0	0	0	0	0	0	1	1
MSMEG_1813c	-	propionyl-CoA carboxylase beta chain	24	0.3	3.1	3.22	16.2	150.7	2.8	0.121	1
MSMEG_1814	-	hypothetical protein MSMEG_1814	3	57.7	43.5	-0.41	346	260.77	-14.2	0.72	1
MSMEG_1815c	-	hypothetical protein MSMEG_1815	1	0	0	0	0	0	0	1	1
MSMEG_1817c	-	transmembrane protein	6	62.2	25.8	-1.27	746.9	309.28	-36.5	0.73	1
MSMEG_1818	-	membrane flanked domain-containing protein	5	75.3	79.2	0.07	752.7	792.03	3.9	0.96	1
MSMEG_1819	purK	phosphoribosylaminoimidazole carboxylase ATPase subunit	6	131.2	103.8	-0.34	1573.9	1245.54	-27.4	0.8	1
MSMEG_1820	purE	phosphoribosylaminoimidazole carboxylase, catalytic subunit	1	40.6	30.3	-0.42	81.2	60.54	-10.3	1	1
MSMEG_1821	-	acyl-CoA dehydrogenase	16	240.6	275.1	0.19	7699.5	8803.68	34.5	0.74	1
MSMEG_1822	-	biotin-	3	0	0	0	0	0	0	1	1
MSMEG_1823c	-	hypothetical protein MSMEG_1823	5	199.4	143.6	-0.47	1994.4	1435.69	-55.9	0.51	1
MSMEG_1824c	-	transcriptional regulator, LytR family protein	9	81.6	47.9	-0.77	1469.6	862.91	-33.7	0.56	1
MSMEG_1825	rfbD	dTDP-4-dehydrorhamnose reductase	17	12	14.8	0.3	408.9	504.09	2.8	0.88	1
MSMEG_1826	-	dTDP-RhA:a-D-GlcNAc-diphosphoryl polyprenol, a-3-L-rhamnosyl transferase	14	0	5.5	2.71	0	155.35	5.5	0.12	1
MSMEG_1827c	-	hydrolase, nudix family protein, putative	3	18.5	3.9	-2.25	111.1	23.28	-14.6	0.41	1
MSMEG_1829c	-	F420-0--gamma-glutamyl ligase	4	31.4	30.3	-0.05	251.4	242.15	-1.2	1	1
MSMEG_1830c	cofD	LPPG:FO 2-phospho-L-lactate transferase	10	89.3	138	0.63	1786.8	2759.63	48.6	0.5	1
MSMEG_1831	-	transcription factor WhiB	5	0	0	0	0	0	0	1	1
MSMEG_1832c	-	hypothetical protein MSMEG_1832	6	120	62.5	-0.94	1439.5	749.47	-57.5	0.21	1
MSMEG_1833	-	hypothetical protein MSMEG_1833	2	5.1	0	-2.6	20.2	0	-5.1	1	1
MSMEG_1834	manB	phosphomannomutase/phosphoglucomutase	15	0.3	0	-0.34	8.1	0	-0.3	0.55	1
MSMEG_1835	-	TobH protein	8	21.7	14.6	-0.58	347.9	232.83	-7.2	0.6	1
MSMEG_1836	manA	mannose-6-phosphate isomerase, class I	8	0.3	1.9	2.9	4	30.14	1.6	1	1
MSMEG_1837c	-	secreted protein	14	118	75.3	-0.65	3303.2	2107.68	-42.7	0.39	1
MSMEG_1838	-	cationic amino acid transporter	19	158.2	173.5	0.13	6010.3	6592.65	15.3	0.82	1
MSMEG_1839	-	alkane 1-monooxygenase	22	322.6	239.5	-0.43	14192.3	10536.6	-83.1	0.35	1
MSMEG_1840	-	rubredoxin	3	54.9	24.8	-1.14	329.3	149.01	-30	0.37	1
MSMEG_1841	-	rubredoxin	2	0	14	3.9	0	55.88	14	0.45	1
MSMEG_1842	-	transcriptional regulator, TetR family protein	9	159	273.9	0.79	2861.5	4930.71	115	0.32	1
MSMEG_1844c	-	hypothetical protein MSMEG_1844	6	67.8	28.9	-1.23	813.7	346.28	-39	0.24	1
MSMEG_1845c	-	YghA protein	6	156.1	43	-1.86	1873.6	516.38	-113.1	0.14	1
MSMEG_1846c	-	polysulphide reductase, NrfD	11	177.4	114.8	-0.63	3903.5	2526.66	-62.6	0.5	1
MSMEG_1847c	-	4Fe-4S ferredoxin, iron-sulfur binding protein	11	34.9	485.4	3.8	768.6	10678.3	450.4	0.38	1
MSMEG_1849c	selB	selenocysteine-specific translation elongation factor	8	85.2	61.4	-0.47	1362.5	982.56	-23.7	0.44	1
MSMEG_1850c	selA	selenocysteine synthase	7	59	42.7	-0.47	826.3	598.26	-16.3	0.53	1
MSMEG_1852	selD	selenide, water dikinase	10	71.2	251.2	1.82	1424.8	5023.21	179.9	0.27	1
MSMEG_1854	-	valosin containing protein-1	12	139.2	102.8	-0.44	3339.6	2468.32	-36.3	0.39	1
MSMEG_1855	-	TPR repeat-containing protein	16	78.3	91.9	0.23	2505.3	2940.98	13.6	0.67	1
MSMEG_1856c	-	hypothetical protein MSMEG_1856	11	114	64.8	-0.81	2507.8	1425.6	-49.2	0.22	1
MSMEG_1857	-	transposase IstA protein, putative	15	73.5	62.5	-0.23	2205.7	1875.24	-11	0.81	1
MSMEG_1858	-	putative transposition helper protein	9	55.5	26.5	-1.07	998.9	476.67	-29	0.26	1
MSMEG_1859c	-	hypothetical protein MSMEG_1859	5	70.4	40.5	-0.8	704.1	404.87	-29.9	0.54	1
MSMEG_1860c	-	hypothetical protein MSMEG_1860	4	67.7	188.8	1.48	541.3	1510.47	121.1	0.79	1
MSMEG_1861c	-	hypothetical protein MSMEG_1861	12	125.2	315.1	1.33	3003.8	7561.65	189.9	0.45	1
MSMEG_1862c	-	transposase	17	219.5	161.3	-0.44	7463.5	5484.57	-58.2	0.11	1
MSMEG_1863c	-	putative transposase	6	166	227.6	0.46	1991.7	2731.04	61.6	0.52	1
MSMEG_1864c	-	transposase	2	95.2	60.5	-0.65	380.7	242.15	-34.6	0.52	1
MSMEG_1865	-	IS1549, transposase	16	349.2	302.9	-0.21	11175.8	9693.49	-46.3	0.59	1
MSMEG_1866c	-	transposase B	8	61.3	75.6	0.3	980.3	1210.36	14.4	0.83	1
MSMEG_1867c	-	transposase	3	195.7	213	0.12	1174.3	1277.75	17.2	0.86	1
MSMEG_1868c	-	hypothetical protein MSMEG_1868	9	0	6.7	2.94	0	120.56	6.7	0.29	1
MSMEG_1869c	-	hypothetical protein MSMEG_1869	20	152.3	105	-0.54	6091.4	4199.46	-47.3	0.33	1
MSMEG_1870c	-	hypothetical protein MSMEG_1870	51	112.8	100.6	-0.16	11501	10262.3	-12.1	0.58	1
MSMEG_1871c	-	hypothetical protein MSMEG_1871	3	38.4	25.6	-0.59	230.7	153.67	-12.8	0.84	1
MSMEG_1872c	-	hypothetical protein MSMEG_1872	5	115.7	101.3	-0.19	1156.9	1013.1	-14.4	0.85	1
MSMEG_1873	-	thymidylate kinase	10	7.5	1.5	-2.31	149.8	30.14	-6	1	1
MSMEG_1874	mtrA	DNA-binding response regulator MtrA	4	55	15.7	-1.81	439.9	125.47	-39.3	0.24	1
MSMEG_1875	-	sensor histidine kinase MtrB	8	33.8	8.4	-2	541.6	135.04	-25.4	0.037	1
MSMEG_1876	-	lipoprotein LpqB	14	52.1	149.9	1.52	1459.3	4195.98	97.7	0.26	1
MSMEG_1877	-	hypothetical protein MSMEG_1877	2	12.8	25.6	1	51.3	102.45	12.8	1	1
MSMEG_1878	-	S30AE family protein	8	198.3	342.4	0.79	3172.6	5478.14	144.1	0.51	1
MSMEG_1879c	-	hypothetical protein MSMEG_1879	3	144.1	170.4	0.24	864.9	1022.41	26.3	0.79	1
MSMEG_1880c	-	hypothetical protein MSMEG_1880	6	117.5	97.9	-0.26	1409.8	1174.53	-19.6	0.79	1
MSMEG_1881	secA	preprotein translocase subunit SecA	36	3.3	0.7	-2.16	239.1	53.42	-2.6	0.33	1
MSMEG_1882	-	acyltransferase, ws/dgat/mgat subfamily protein	16	237.1	293.2	0.31	7588.2	9383.18	56.1	0.61	1
MSMEG_1883	-	glycine betaine transporter OpuD	15	136.8	241.5	0.82	4103.5	7243.69	104.7	0.84	1
MSMEG_1884	-	hypothetical protein MSMEG_1884	5	336.4	223	-0.59	3363.7	2230.04	-113.4	0.5	1
MSMEG_1885	-	2Fe-2S iron-sulfur cluster binding domain-containing protein	7	13.1	23.8	0.86	183.3	332.57	10.7	0.31	1
MSMEG_1886	-	Fatty acid desaturase	15	28.7	13.5	-1.09	860.2	404.87	-15.2	0.077	1
MSMEG_1887	-	hypothetical protein MSMEG_1887	2	58.6	302.6	2.37	234.3	1210.5	244	0.71	1
MSMEG_1888c	-	methyltransferase	7	30	23.9	-0.32	419.9	335.28	-6	0.66	1
MSMEG_1889c	-	putative ribosome small subunit-dependent GTPase RsgA	4	0.5	5.5	3.45	4	44.11	5	0.48	1
MSMEG_1890c	aroA	3-phosphoshikimate 1-carboxyvinyltransferase	4	0.5	0	-0.59	4	0	-0.5	1	1
MSMEG_1891	-	hypothetical protein MSMEG_1891	3	188.2	239.8	0.35	1129.4	1438.54	51.5	0.67	1
MSMEG_1892	-	transferase	11	73.1	110.8	0.6	1608.1	2438.06	37.7	0.55	1
MSMEG_1893c	-	UbiE/COQ5 methyltransferase	2	13.4	5.8	-1.21	53.7	23.28	-7.6	0.68	1
MSMEG_1894c	-	short chain dehydrogenase	10	170.3	36.6	-2.22	3405.5	731.1	-133.7	0.01	1
MSMEG_1895c	-	HTH-type transcriptional regulator AlsR	7	177.1	186.6	0.08	2479.3	2611.9	9.5	0.93	1
MSMEG_1896	-	acetyl-CoA acetyltransferase	6	45.7	59.4	0.38	548.5	712.35	13.7	0.76	1
MSMEG_1897	pcaD	3-oxoadipate enol-lactonase	6	34.4	65.2	0.92	412.9	782.2	30.8	0.38	1
MSMEG_1898	-	succinyl-CoA:3-ketoacid-coenzyme A transferase 1, precursor	3	59.2	47.7	-0.31	355.1	286.26	-11.5	0.8	1
MSMEG_1899	-	succinyl-CoA:3-ketoacid-coenzyme A transferase subunit B	3	57	31	-0.88	342.3	186.27	-26	0.48	1
MSMEG_1900c	-	D-alanyl-D-alanine carboxypeptidase family protein	3	120.3	1411.8	3.55	721.5	8471.02	1291.6	0.53	1
MSMEG_1901c	-	DNA-binding HTH domain-containing protein	18	116.6	110.1	-0.08	4197.1	3962.09	-6.5	0.9	1
MSMEG_1902c	-	transcriptional regulator	6	197	100.6	-0.97	2364.5	1207.51	-96.4	0.28	1
MSMEG_1903c	-	caib/baif family protein	15	54.5	30.2	-0.85	1635	904.57	-24.3	0.23	1
MSMEG_1904c	-	acyl-CoA dehydrogenase	11	59	234.1	1.99	1298.7	5150.11	175.1	0.26	1
MSMEG_1905c	-	acyl-CoA dehydrogenase protein	10	109	111.2	0.03	2179.4	2223.97	2.2	0.92	1
MSMEG_1906c	-	toluate 1,2-dioxygenase electron transfer component	31	88.4	64	-0.47	5483.5	3967	-24.5	0.3	1
MSMEG_1907c	-	toluate 1,2-dioxygenase beta subunit	13	101.5	69.8	-0.54	2640	1814.56	-31.7	0.32	1
MSMEG_1908c	-	benzoate 1,2-dioxygenase alpha subunit	17	100.8	144.7	0.52	3426.1	4920.74	44	0.58	1
MSMEG_1909	-	putative HTH-type transcriptional regulator YnfL	7	69.8	41.2	-0.76	977.2	577.17	-28.6	0.23	1
MSMEG_1910	-	muconate cycloisomerase	11	90.5	45.7	-0.99	1990	1005.07	-44.8	0.12	1
MSMEG_1911	catA	catechol 1,2-dioxygenase	9	242.5	248.6	0.04	4364.3	4475.63	6.2	0.97	1
MSMEG_1912	-	muconolactone delta-isomerase 1	4	45.6	38.4	-0.25	364.9	307.34	-7.2	0.91	1
MSMEG_1913c	ybaK	YbaK/ebsC protein	3	101.1	60.5	-0.74	606.6	362.96	-40.6	0.72	1
MSMEG_1914	-	RNA polymerase sigma-70 factor, family protein	10	293.7	161.2	-0.87	5873.8	3223.86	-132.5	0.12	1
MSMEG_1915	-	anti-sigma factor, family protein	3	15.7	17.4	0.16	94	104.65	1.8	1	1
MSMEG_1916c	-	hypothetical protein MSMEG_1916	1	318	76.8	-2.05	636	153.67	-241.2	0.32	1
MSMEG_1917	-	putative acetyl-CoA carboxylase biotin carboxyl carrier protein subunit	0	0	0	0	0	0	0	1	1
MSMEG_1918	-	sensor histidine kinase	5	67.3	58.9	-0.19	673.4	588.94	-8.5	0.83	1
MSMEG_1919c	-	transcription factor WhiB	0	0	0	0	0	0	0	1	1
MSMEG_1920c	-	diacylglycerol kinase, catalytic region	6	162.1	115.3	-0.49	1945.3	1383.95	-46.8	0.52	1
MSMEG_1921c	-	SecC motif-containing protein	5	269.2	192.4	-0.48	2692.3	1924	-76.8	0.5	1
MSMEG_1922	aroQ	3-dehydroquinate dehydratase, type II	6	0.7	0	-0.76	8.3	0	-0.7	0.44	1
MSMEG_1923	-	membrane protein	5	11.1	78.4	2.82	110.8	784.14	67.3	0.22	1
MSMEG_1924c	-	N-acetyltransferase Ats1	5	160.5	61.4	-1.39	1605.5	614.43	-99.1	0.053	1
MSMEG_1925c	-	isochorismate synthase DhbC	6	0.7	0	-0.74	8.1	0	-0.7	1	1
MSMEG_1926c	-	acid phosphatase	4	72.9	39.6	-0.88	583.3	316.66	-33.3	0.44	1
MSMEG_1927	-	cobyrinic acid a,c-diamide synthase	8	81.5	142	0.8	1303.7	2272.22	60.5	0.35	1
MSMEG_1928	-	regulatory protein	3	34.3	59.8	0.8	206	358.57	25.4	0.6	1
MSMEG_1929c	-	hypothetical protein MSMEG_1929	12	47.9	131.7	1.46	1150.4	3160.12	83.7	0.16	1
MSMEG_1930c	-	DEAD/DEAH box helicase	13	65.3	152.7	1.23	1698.4	3970.52	87.4	0.18	1
MSMEG_1931	-	hypothetical protein MSMEG_1931	8	10.7	8.7	-0.29	170.7	139.44	-2	0.68	1
MSMEG_1932c	-	MmpS3 protein	14	159	285.2	0.84	4453.1	7985.93	126.2	0.22	1
MSMEG_1933	-	hypothetical protein MSMEG_1933	1	263.5	190.9	-0.47	527.1	381.85	-72.6	1	1
MSMEG_1934	-	ATP-binding protein	1	447	125.7	-1.83	894.1	251.46	-321.3	0.34	1
MSMEG_1935c	-	TetR-family protein transcriptional regulator	10	5	6.2	0.31	99.6	123.27	1.2	0.82	1
MSMEG_1936	-	hypothetical protein MSMEG_1936	14	276.7	157	-0.82	7748.5	4396.59	-119.7	0.14	1
MSMEG_1937	-	molybdopterin biosynthesis-like protein MoeZ	15	226	221.6	-0.03	6780.3	6648.77	-4.4	0.98	1
MSMEG_1938	-	hypothetical protein MSMEG_1938	9	65	127.7	0.97	1170.5	2299.13	62.7	0.39	1
MSMEG_1939c	-	6-O-methylguanine DNA methyltransferase	2	35.2	31.4	-0.17	141	125.73	-3.8	1	1
MSMEG_1940c	-	hydrolase, alpha/beta fold family protein	3	6.7	14	1.05	40.5	83.82	7.2	0.47	1
MSMEG_1941	-	helicase, UvrD/Rep family protein	11	28.3	87.4	1.63	621.7	1923.62	59.2	0.2	1
MSMEG_1942c	-	integral membrane protein	4	77.3	57	-0.44	618.4	456.36	-20.3	0.65	1
MSMEG_1943	-	ATP-dependent DNA helicase	20	20.9	15.8	-0.4	835.3	633.05	-5.1	0.58	1
MSMEG_1944c	-	membrane protein	4	240.2	127.2	-0.92	1921.3	1017.36	-113	0.31	1
MSMEG_1945	-	ion channel membrane protein	12	39.9	141.9	1.83	957.8	3404.86	102	0.68	1
MSMEG_1946	nudC	NADH pyrophosphatase	7	246.2	425.2	0.79	3446.3	5952.6	179	0.34	1
MSMEG_1947c	-	hypothetical protein MSMEG_1947	5	455	255.6	-0.83	4550.2	2556.28	-199.4	0.15	1
MSMEG_1948c	-	hypothetical protein MSMEG_1948	2	0	0	0	0	0	0	1	1
MSMEG_1949	-	hypothetical protein MSMEG_1949	0	0	0	0	0	0	0	1	1
MSMEG_1950	-	hypothetical protein MSMEG_1950	2	79.7	148.1	0.89	318.6	592.31	68.4	0.46	1
MSMEG_1951	-	hypothetical protein MSMEG_1951	2	218.5	86.7	-1.33	873.9	346.79	-131.8	0.17	1
MSMEG_1952	-	ATP-dependent DNA helicase	18	21	6.5	-1.68	755.5	235.03	-14.5	0.39	1
MSMEG_1953	-	transcription factor WhiB	1	26.3	2.3	-3.5	52.6	4.66	-24	1	1
MSMEG_1954c	-	ABC1 family protein	11	132.6	62.5	-1.08	2916.5	1374.89	-70.1	0.15	1
MSMEG_1955c	-	hypothetical protein MSMEG_1955	5	70.4	91.1	0.37	704.1	910.65	20.7	0.76	1
MSMEG_1956	-	hypothetical protein MSMEG_1956	3	168.1	60.5	-1.47	1008.6	363.22	-107.6	0.43	1
MSMEG_1957c	-	hypothetical protein MSMEG_1957	2	75.3	436.6	2.53	301.4	1746.41	361.3	0.68	1
MSMEG_1958	-	PDZ domain-containing protein	6	172	158.8	-0.11	2063.4	1905.38	-13.2	0.87	1
MSMEG_1959	-	hypothetical protein MSMEG_1959	58	46.5	35.9	-0.37	5397.6	4165.57	-10.6	0.23	1
MSMEG_1960	-	hypothetical protein MSMEG_1960	3	61.9	42.7	-0.54	371.2	256.12	-19.2	0.69	1
MSMEG_1961	-	hypothetical protein MSMEG_1961	14	162.6	285.5	0.81	4553.6	7992.65	122.8	0.83	1
MSMEG_1962	-	hypothetical protein MSMEG_1962	6	39.7	32.4	-0.29	475.8	388.71	-7.3	0.78	1
MSMEG_1963	-	putative transcriptional regulatory protein	25	68.2	50.9	-0.42	3407.6	2546.32	-17.2	0.26	1
MSMEG_1964	-	mitomycin radical oxidase	12	57	109.5	0.94	1368.7	2626.92	52.4	0.67	1
MSMEG_1966c	-	hypothetical protein MSMEG_1966	4	171.5	127.1	-0.43	1372	1016.59	-44.4	0.61	1
MSMEG_1967	-	TetR-family protein transcriptional regulator	10	155.6	406.8	1.39	3112.8	8136.62	251.2	0.45	1
MSMEG_1968c	-	putative oxidoreductase	6	191.1	345.9	0.86	2293.6	4151.1	154.8	0.45	1
MSMEG_1969	-	MerR-family protein transcriptional regulator	6	190.4	87.6	-1.12	2284.5	1051.64	-102.7	0.31	1
MSMEG_1970c	-	sigma factor	18	87.4	100.3	0.2	3147.1	3609.23	12.8	0.84	1
MSMEG_1971	-	propane monooxygenase hydroxylase large subunit	32	87.1	97.3	0.16	5571.4	6229.02	10.3	0.83	1
MSMEG_1972	-	methane monooxygenase component C	14	134.3	96.3	-0.48	3759.3	2696.76	-37.9	0.46	1
MSMEG_1974	-	propane monooxygenase coupling protein	4	65.1	32.3	-1.01	521	258.32	-32.8	0.31	1
MSMEG_1975	-	amidohydrolase 2	27	99.1	114.7	0.21	5351.8	6194.49	15.6	0.83	1
MSMEG_1976	-	hypothetical protein MSMEG_1976	10	65.9	116.7	0.82	1318.5	2334.58	50.8	0.89	1
MSMEG_1977	-	alcohol dehydrogenase	9	61.5	58.4	-0.07	1106.5	1051.78	-3	0.96	1
MSMEG_1978	groEL	chaperonin GroEL	8	70.2	82.7	0.24	1123.9	1322.77	12.4	0.91	1
MSMEG_1979	-	antibiotic biosynthesis monooxygenase	3	92	11.6	-2.98	552.2	69.85	-80.4	0.17	1
MSMEG_1980c	-	hypothetical protein MSMEG_1980	20	113.9	83.4	-0.45	4554.2	3334.6	-30.5	0.48	1
MSMEG_1981c	-	hypothetical protein MSMEG_1981	5	63.1	50	-0.34	630.8	499.69	-13.1	0.84	1
MSMEG_1982	-	acyl-CoA synthase	18	67.3	44.6	-0.59	2422.7	1607.21	-22.7	0.32	1
MSMEG_1983c	-	major facilitator family protein transporter	12	56	32.9	-0.77	1343.7	788.92	-23.1	0.46	1
MSMEG_1984c	-	haloacetate dehalogenase H-1	9	101.2	96.4	-0.07	1822.4	1735.14	-4.8	0.92	1
MSMEG_1985	-	transcriptional regulator, LysR family protein	11	48.9	31.1	-0.65	1076.1	683.5	-17.8	0.46	1
MSMEG_1986	-	tartrate dehydrogenase	12	118	57	-1.05	2833	1367.26	-61.1	0.112	1
MSMEG_1987	-	hypothetical protein MSMEG_1987	8	91	287.2	1.66	1456.3	4594.65	196.1	0.42	1
MSMEG_1988	-	hypothetical protein MSMEG_1988	2	36.3	45.8	0.34	145.2	183.29	9.5	0.8	1
MSMEG_1989	-	phenoxybenzoate dioxygenase beta subunit	12	67.7	39.9	-0.76	1625	958.51	-27.8	0.39	1
MSMEG_1990	-	hypothetical protein MSMEG_1990	18	90.4	42.3	-1.1	3254.6	1523.39	-48.1	0.22	1
MSMEG_1991	-	isovaleryl-CoA dehydrogenase	16	92.4	30.2	-1.61	2956.3	965.36	-62.2	0.041	1
MSMEG_1992	-	L-carnitine dehydratase/bile acid-inducible protein F	8	56	74.3	0.41	895.2	1188.76	18.3	0.63	1
MSMEG_1993	-	MaoC like domain-containing protein	7	84.3	127.3	0.59	1179.9	1782.1	43	0.6	1
MSMEG_1994	-	HpcH/HpaI aldolase	2	3	17.5	2.52	12.1	69.85	14.4	1	1
MSMEG_1995c	-	transcriptional regulator MdcY family protein	4	82.3	48.9	-0.75	658.3	391.16	-33.4	0.34	1
MSMEG_1996	-	N5,N10- methylenetetrahydromethanopterin reductase-related protein	10	192	219.5	0.19	3840.8	4389.49	27.4	0.92	1
MSMEG_1997	-	N-acyl-D-glutamate amidohydrolase	14	46	31	-0.57	1287.3	868.09	-15	0.26	1
MSMEG_1998	-	hydrolase, alpha/beta fold family protein	13	103.9	81.5	-0.35	2702.2	2118.81	-22.4	0.6	1
MSMEG_1999c	-	hypothetical protein MSMEG_1999	1	0	75.5	6.26	0	150.96	75.5	0.37	1
MSMEG_2000c	-	hypothetical protein MSMEG_2000	7	163.5	136.7	-0.26	2289.4	1913.13	-26.9	0.74	1
MSMEG_2001c	-	sugar transporter	7	210.8	141.2	-0.58	2951.5	1977.43	-69.6	0.43	1
MSMEG_2002	-	IS1096, tnpR protein	10	411.4	311.8	-0.4	8228.4	6236	-99.6	0.32	1
MSMEG_2003c	-	IS1096, tnpA protein	9	590	501.2	-0.24	10620.4	9021.5	-88.8	0.67	1
MSMEG_2004c	-	arabinose-proton symporter	10	93.4	164	0.81	1868.8	3279.24	70.5	0.24	1
MSMEG_2005c	-	sugar phosphate isomerase/epimerase	8	62.7	33.1	-0.92	1003	530.09	-29.6	0.34	1
MSMEG_2006c	-	2,3-dihydroxybiphenyl 1,2-dioxygenase	9	80.2	51.4	-0.64	1443.3	924.88	-28.8	0.4	1
MSMEG_2007c	-	putative HpcE protein	6	114	92.5	-0.3	1368.1	1109.46	-21.6	0.73	1
MSMEG_2008	-	hypothetical protein MSMEG_2008	3	0	0.8	0.83	0	4.66	0.8	1	1
MSMEG_2009	-	regulatory protein GntR, HTH:GntR, C-	6	92	48.3	-0.93	1104.3	579.63	-43.7	0.51	1
MSMEG_2010c	-	stress responsive A/B barrel domain superfamily protein	6	31.4	203.7	2.7	376.7	2443.88	172.3	0.35	1
MSMEG_2011c	-	transcriptional regulator, LacI family protein	9	45.8	45.3	-0.02	823.6	814.66	-0.5	1	1
MSMEG_2012	hisD	histidinol dehydrogenase	13	71.1	44.7	-0.67	1847.4	1162.88	-26.3	0.44	1
MSMEG_2013	-	oxidoreductase, short chain dehydrogenase/reductase family protein	5	41.1	42	0.03	410.6	420.27	1	0.97	1
MSMEG_2014c	-	molybdenum import ATP-binding protein ModC	6	2.7	5.4	1	32.6	65.19	2.7	0.7	1
MSMEG_2015c	modB	molybdate ABC transporter, permease protein	7	88.3	42.8	-1.04	1236.3	599.42	-45.5	0.77	1
MSMEG_2016c	modA	molybdate ABC transporter, periplasmic molybdate-binding protein	3	32	20.2	-0.67	192.2	121.07	-11.9	1	1
MSMEG_2017c	-	transcriptional regulator, MerR family protein	2	27.8	0	-4.85	111.1	0	-27.8	1	1
MSMEG_2019	-	short-chain dehydrogenase/reductase SDR	2	170.8	1631.2	3.26	683.1	6524.63	1460.4	0.98	1
MSMEG_2021	-	lipopolysaccharide biosynthesis acyltransferase, M	28	135.5	195.5	0.53	7590.7	10948.9	60	0.53	1
MSMEG_2022	-	GntT protein, putative	5	127	63.8	-0.99	1269.9	637.97	-63.2	0.19	1
MSMEG_2023	-	CAIB/BAIF family protein	16	67.5	35.6	-0.92	2159.5	1138.43	-31.9	0.11	1
MSMEG_2024	-	hydroxymethylglutaryl-CoA lyase	2	13.7	18.6	0.45	54.6	74.51	5	0.98	1
MSMEG_2025	-	putative IclR family protein transcriptional regulator	6	37.6	5	-2.9	450.6	60.54	-32.5	0.089	1
MSMEG_2026	-	short chain dehydrogenase	7	68.7	52.7	-0.38	961.1	737.44	-16	0.66	1
MSMEG_2027c	-	hypothetical protein MSMEG_2027	7	132.8	90.3	-0.56	1859.8	1263.65	-42.6	0.57	1
MSMEG_2028c	-	chloramphenicol resistance protein	10	60.8	35.3	-0.78	1215.8	706.79	-25.4	0.33	1
MSMEG_2029c	-	3-ketoacyl-ACP/CoA redutase	3	38.1	11.6	-1.71	228.7	69.85	-26.5	0.35	1
MSMEG_2030	-	transcriptional regulator, TetR family protein	5	69.1	26.1	-1.41	690.8	260.77	-43	0.22	1
MSMEG_2031c	-	hypothetical protein MSMEG_2031	0	0	0	0	0	0	0	1	1
MSMEG_2032	-	hypothetical protein MSMEG_2032	8	70.7	244	1.79	1131.7	3904.3	173.3	0.21	1
MSMEG_2033c	-	oxidoreductase, zinc-binding dehydrogenase family protein	7	27.3	117.3	2.1	382.3	1642.8	90	0.62	1
MSMEG_2034	-	aryl-alcohol dehydrogenase	3	71.5	22.1	-1.69	428.9	132.59	-49.4	0.47	1
MSMEG_2035c	-	amine oxidase	13	35.3	118.9	1.75	917.5	3090.79	83.6	0.75	1
MSMEG_2036	-	hydrolase, alpha/beta fold family protein	8	24.7	4.7	-2.41	394.7	74.51	-20	0.74	1
MSMEG_2037	-	hypothetical protein MSMEG_2037	11	107.7	158.3	0.56	2368.6	3481.69	50.6	0.79	1
MSMEG_2038	-	monooxygenase, flavin-binding family protein	27	70.4	41.8	-0.75	3802.3	2255.01	-28.7	0.082	1
MSMEG_2039c	-	putative transcriptional regulator	6	9.2	10.5	0.19	110.2	125.73	1.3	0.97	1
MSMEG_2040	-	hypothetical protein MSMEG_2040	6	11.9	32.3	1.44	143.2	387.67	20.4	0.47	1
MSMEG_2042c	-	phosphotransferase enzyme family protein	13	27.9	17.4	-0.68	724.3	451.7	-10.5	0.35	1
MSMEG_2043	-	transcriptional regulator, TetR family protein	4	81.8	31.1	-1.4	654.8	248.75	-50.8	0.25	1
MSMEG_2044	-	integral membrane transport protein	18	109.3	83.8	-0.38	3934.8	3016.9	-25.5	0.41	1
MSMEG_2045	-	monoxygenase	19	98.3	205	1.06	3736.2	7789.18	106.7	0.71	1
MSMEG_2046	-	GlcNAc-PI de-N-acetylase family protein	10	62.5	98.8	0.66	1249.8	1976.14	36.3	0.84	1
MSMEG_2047c	-	enoyl-CoA hydratase	6	35	30.3	-0.21	419.4	363.22	-4.7	0.83	1
MSMEG_2048	-	alcohol dehydrogenase	3	24.2	186.9	2.95	145.2	1121.11	162.6	0.34	1
MSMEG_2049	-	putative transcriptional regulator, TetR family protein	10	59.6	27.7	-1.11	1192	554.15	-31.9	0.076	1
MSMEG_2050c	nuoN	NADH dehydrogenase subunit N	17	12.3	42.3	1.78	417.8	1438.54	30	0.092	1
MSMEG_2051c	nuoM	NADH dehydrogenase subunit M	22	31.6	64.8	1.04	1389.8	2851.22	33.2	0.13	1
[truncated: 4,720 more rows]
